# Supplementary material for: Arrested development – a comparative analysis of multilayer coronatextures in metamorphic rocks
Source: Copernicus journal article supplement (doi:10.5194/se-2016-97), 2016-07-25
Supplement: Supplementary file [file se-2016-97-AC1-supplement.pdf]

# Arrested development – a comparative analysis of multilayer corona textures in high-grade metamorphic rocks

Paula P-Ogilvie<sup>1</sup>, Roger Lawrence R-L. Gibson<sup>1</sup>,

<sup>1</sup>School of Geosciences, University of the Witwatersrand, P O WITS, Johannesburg 2050, South Africa

Correspondence to: Roger L. Gibson (roger.gibson@wits.ac.za)

**Abstract.** Coronas, including symplectites, ~~are provide~~ vital clues to the presence of arrested reaction and preservation of partial equilibrium in metamorphic and igneous rocks. Compositional zonation across such coronas is common, indicating the persistence of chemical potential gradients and incomplete equilibration. Major controls on corona mineralogy include  $P$ ,  $T$  and  $a_{\text{H}_2\text{O}}$  during formation, ~~continuous or non-continuous single-stage or sequential corona eorona formation layer growth,~~ reactant bulk compositions and extent of metasomatic exchange with the surrounding rock, relative diffusion rates for major components, and/or contemporaneous deformation and strain. High-variance local equilibria in a corona and disequilibrium across the corona as a whole preclude the application of conventional thermobarometry when determining  $P$ - $T$  conditions of corona formation, and zonation in phase composition across a corona should not be interpreted as a record of discrete  $P$ - $T$  conditions during successive layer growth along the  $P$ - $T$  path. Rather, the local equilibria between mineral pairs in corona layers more likely reflect compositional partitioning of the corona domain during steady-state growth at constant  $P$  and  $T$ .

Corona formation in pelitic and mafic ~~bulk rocks k-compositions~~ requires relatively dry, ~~restite-residual~~ bulk rock compositions. Since most melt is lost along the high- $T$  prograde to peak segment of the  $P$ - $T$  path, at or near peak conditions only a small fraction of melt is generally retained in the ~~restite-residual~~ post-peak assemblage. Reduced melt volumes with cooling limit length-scales of diffusion to the extent that diffusion-controlled corona growth occurs. On the prograde path, the low melt (or melt-absent) volumes required for diffusion kinetically constrained controlled corona growth are only commonly realised in mafic igneous rocks, owing to their intrinsic anhydrous bulk composition, and in dry, ~~restite-residual~~ pelitic compositions that have lost melt in an earlier metamorphic event.

~~Mafic and pelitic prograde coronas show similar ranges of thickness and vermicule size; prograde contact aureole coronas display similar thicknesses but slightly longer vermicule lengths compared to regional metamorphic coronas. Retrograde coronas in mafic rocks are significantly thinner than pelitic coronas and have smaller vermicule lengths, whereas retrograde pelitic coronas show similar parameters to their prograde counterparts. Reduced maximum corona thickness and smaller maximum vermicule size in retrograde mafic coronas compared to retrograde pelitic coronas attests to more restricted~~

Formatted: Line spacing: 1,5 lines

Formatted: Not Highlight

Formatted: Subscript

Formatted: Font: Italic

Formatted: Font: Italic

length scales of diffusion in melt-poor, anhydrous, mafic bulk rock compositions. Increased maximum layer thickness and vermicule size in prograde mafic coronas compared to retrograde mafic coronas is due to greater length scales of diffusion in more melt-rich bulk compositions with protracted reaction along the prograde path. Prograde pelitic coronas do not differ significantly from retrograde pelitic coronas with respect to microstructure, owing to the intrinsically more hydrous pelitic bulk compositions and capacity to generate diffusion-enhancing melt during decompression.

Experimental work characterising rate-limiting reaction mechanisms and their petrogenetic signatures in increasingly complex, higher variance systems has facilitated the refinement of chemical fractionation and partial equilibration diffusion models necessary to fully understand corona development. Through the application of ~~either~~ quantitative physical diffusion modelling models of coronas ~~or coupled with~~ phase equilibria modelling utilising calculated chemical potential gradients, it is possible to model the evolution of a corona through  $P$ - $T$ - $X$ - $t$  space by continuous, ~~steady-state -and/or sequential, non-continuous/episodic processes~~ reaction mechanisms. Most coronas in granulites form through a combination of these end-member reaction mechanisms each characterised by distinct textural and chemical potential signatures with very different petrogenetic implications. An understanding of the inherent petrogenetic limitations of a reaction mechanism model is critical if an appropriate interpretation of  $P$ - $T$  evolution is to be inferred from a corona. Since corona modelling employing calculated chemical potential gradients assumes nothing about the sequence in which the layers forms and is directly constrained by phase compositional variation within a layer, it allows far more nuanced and robust understanding of corona evolution and its implications for the path of a rock in  $P$ - $T$ - $X$  space.

Key words: corona, chemical potential gradient, diffusion, disequilibrium, metamorphism, mineral compositional zoning, reaction dynamics, reaction texture, symplectite.

## 1 Introduction

Fundamental to the study of metamorphic rocks is the application of equilibrium thermodynamics in the understanding of the development of a mineral assemblage within evolving pressure ( $P$ ), temperature ( $T$ ) and chemical potential regimes. In an equilibrated assemblage, the chemical potentials of all components are equal ~~spatially~~ throughout the equilibrium volume. However, different rates of intergranular diffusion for major and trace components limit the capacity of a rock to fully eliminate gradients in chemical potentials and attain equilibrium on both micro- and macro-scales (Fisher, 1977; Joesten, 1977; Fisher & Lasaga, 1981; Foster, 1981; Ashworth & Birdi 1990; Carlson, 2002; White et al., 2008; White & Powell, 2011). A more realistic model of partial equilibrium, i.e., equilibrium for some components and not for others, is likely to be attained in a rock. In a sense partial equilibrium is fortuitous, since evidence of disequilibrium preserved in reaction textures reveals basic physico-chemical reaction dynamics operating during metamorphism that are obscured if a rock equilibrates completely. However, partial disequilibrium also compromises petrographic and geothermobarometric evidence as records of the metamorphic evolution of a rock and can lead to erroneous interpretations (Mueller et al., 2010; White & Powell,

Formatted: Space After: 0 pt

Formatted: Font: Italic

Formatted: Line spacing: 1,5 lines

Formatted: Font: Not Bold, Font color: Auto

Formatted: Font: 10 pt, Not Bold, Font color: Auto

Formatted: Font: Not Bold, Not Italic, Font color: Auto

2011; Mueller et al., 2015). Thus, ~~An~~ understanding of how partial equilibrium manifests petrographically and chemically is, ~~thus, critical in refining our appreciation of metamorphic rocks~~ critical if we are to appreciate both the limitations and opportunities it affords in petrogenetic studies.

The most obvious manifestation of partial equilibrium ~~is that exhibited in~~ is reaction textures comprising coronas and symplectites. The spatially segregated phases preserved within these ~~incipient~~ reaction textures are the best petrographic evidence available to ~~us to allow the~~ study of the evolution of chemical potential gradients governing the reorganization of components within a rock with changing  $P$ - $T$ - $X$  (composition) conditions (e.g., White et al., 2008; Štípská, et al., 2010; White & Powell 2011; Baldwin et al., 2015). The disequilibrium commonly preserved in coronas and symplectites does not, however, preclude the application of equilibrium thermodynamics in modelling and interpreting those textures; ~~it~~ it only invokes a reconsideration of the appropriate equilibration volume in which chemical potential gradients are absent (White & Powell, 2011). Within any reaction texture, at an appropriate scale, chemical equilibrium exists and attendant chemical potentials may be determined for a given  $P$  and  $T$  within the local bulk composition dictated by the equilibration volume. This concept of local equilibrium was first introduced by Korzhinski (1959) and has been the premise upon which all studies of reaction textures are predicated.

In this paper, we present an analysis of more than 50 metamorphic corona textures developed in high-temperature granulite facies rocks (Appendices 1 and 2) and discuss two contrasting modelling methodologies used in interpreting the evolution of these textures. There are innumerable examples of reaction fronts and replacement textures encountered in lower temperature metamorphic rocks where the role of a discrete fluid phase is critical in the development of the texture. An exhaustive review of low-temperature replacement textures is not attempted here. Rather, we focus on the kinetics of reaction mechanisms and processes with particular reference to those applicable in the granulite  $P$ - $T$  regime. The review concludes with an appraisal of ~~We review recent strides in~~ efforts employing equilibrium thermodynamics and calculated phase diagrams to ~~modeling~~ corona textures and assesses ~~utilising calculated phase diagrams and assess~~ their significance and limitations when used to infer the  $P$ - $T$ - $X$  evolution of a metamorphic rock (White et al., 2008; Štípská et al., 2010; Baldwin et al., 2015).

## 2 Reaction Kinetics

Metamorphic reactions are initiated when a pre-existing mineral assemblage becomes unstable owing to changing  $P$ - $T$ - $X$  conditions. Chemical equilibrium is re-established by adjustment of chemical constituents into a new mineral assemblage coupled with a requisite change of phase compositions in higher variance equilibria. New minerals typically grow as a layer or sequence of layers between reactant phases. This layer succession forms a reaction rim most commonly observed as a corona in granulite facies rocks. Processes involved during metamorphic reaction include: (a) nucleation of product minerals; (b) transport of components to the reaction interface through the reactant by volume or intragranular diffusion; (c) dissolution of the reactant phases; (d) transport of components across the reaction interface along grain boundaries or

**Formatted:** Font: Not Bold, Italic, Font color: Auto

**Comment [P1]:** In this section, we describe reaction mechanisms - interface vs. diffusion. Their serial nature means that the slower of them is rate-limiting. We discuss theoretical models to discern reaction mechanism which are founded on an experimental observation. Preservation of disequilibrium textures produced experimentally enables workers to relate disequilibrium compositions to reaction mechanisms, petrogenetic processes and time. These studies and experimental foundation are critical for properly understanding coronas

**Formatted:** Space After: 12 pt

**Formatted:** Font: Italic

through melt; (e) incorporation of the diffusing components into the product surface through precipitation; and (f) the rate of supply or removal of heat (Fisher, 1977; Joesten, 1977; Brady, 1983; Foster, 1986; Tracey and McLellan, 1985; Carlson, 2002; Dohmen & Chakraborty, 2003; Chakraborty, Mueller et al., 2010; Abart & Petrisheva, 2011; Abart et al., 2012). Where reaction rate is primarily governed by nucleation and precipitation, the reaction is referred to as interface-controlled. Where reaction rate is constrained by rates of component diffusion, it is termed transport-controlled. Mueller et al (2010) stress that the serial nature of these processes means that the slowest of them is the limiting constraint on overall reaction rate and extent as a function of both temperature and time.

A model predicting the relative importance of either interface or diffusion controls on a particular reaction rate with respect to  $P$  and  $T$  was derived by Dohmen and Chakraborty (2003). Although only defined for mineral exchange reactions in the presence of a fluid phase, they derive a reaction mechanism map for determination of the rate-limiting step in any reaction based on relative dominance of either interface-controlled or transport-controlled mechanisms. Employing a thermodynamic model predicated on Fick's Laws governing chemical mass transfer, Abart & Petrisheva (2011) demonstrate that, during initial rim growth, reaction is interface-controlled and gradually becomes diffusion or transport-controlled as the reaction proceeds. Abart et al. (2012) augmented this thermodynamic model to include chemical segregation within a reaction front as a rate-limiting reaction mechanism during the growth of reaction rims with lamellar internal structure or symplectites. These models have been substantiated by a vast body of rigorous experimental work constraining the kinetics of reaction rim growth (e.g., Farver and Yund, 1996; Yund, 1997; Fisler et al., 1997; Milke et al., 2001; Watson and Price, 2002; Milke and Heinrich, 2002; Milke and Wirth, 2003; Abart and Schmidt, 2004; Schmid et al., 2009; Götze et al., 2010; Keller et al., 2008; Niedermeier et al., (2009); Dohmen and Milke, 2010; Keller et al., 2010; Gardes et al., 2011; Joachim et al., 2011a, 2011b; Mueller et al., 2012; Helpa et al., 2014; Helpa et al., 2015; Jonas et al., 2015; Abart et al., 2016). Phenomenological models of disequilibrium elemental and isotopic compositions produced experimentally with incomplete diffusive element exchange (e.g., Mueller et al. 2008; Watson and Mueller, 2009; Mueller et al, 2012) may be utilised to constrain the textural, isotopic and compositional evolution of mineral assemblages and infer timescales of reaction duration (Lasaga, 1983; Ague & Baxter 2007; Niedermeier et al., 2009; Mueller et al, 2015). Ongoing experimental work aimed at characterising rate-limiting reaction mechanisms and their petrogenetic signatures in more complex, higher variance systems is imperative to allow further refinement of partial equilibration models necessary to fully understand coronas. Reviews of the experimental basis for kinetic theory, reaction mechanisms and the petrogenetic implications of this work are provided by Putnis, (2009), Dohmen and Milke, (2010), Mueller et al., (2010, 2015); and Zhang (2010).

### 3 Diffusion and corona growth

Formatted: Not Highlight

**Comment [P2]:** In this section, we relate diffusion as a reaction mechanism to corona development. The basic equations governing development of the coronas are included. We discuss the formation of coronas conceptually and how they have been used to infer portions of the P-T path based on petrogenetic grids. We urge caution in this regard (cite some instances by Powell et al.) and suggest a good understanding of corona formation mechanism is required to do this properly.

## 2 Reaction kinetics and coronas

Metamorphic reactions are initiated when a pre-existing mineral assemblage becomes unstable owing to changing  $P$ - $T$ - $X$  conditions, and seeks to re-establish chemical equilibrium by rearrangement of its chemical constituents into a new mineral assemblage. The critical kinetic constraints on extent of any metamorphic reaction are (a) the rate of supply of matter through intergranular diffusion; (b) the rate of reactant dissolution and product nucleation during recrystallisation (interface control); and (c) the rate of supply or removal of heat (Fisher, 1977; Joesten, 1977; Brady, 1983; Tracey and McLellan, 1985; Carlson, 2002). Interface reaction rate, in turn, depends on the affinity for reaction, i.e., the difference between the chemical potentials of diffusing components and their equilibrium values (Carlson, 2002). The slowest of these rate-limiting processes determines the nature and extent of reaction and equilibration. During stages of reaction at high temperatures in the presence of a melt or fluid phase, reaction rates are typically interface rather than diffusion controlled since diffusion coefficients are large and, thus, unlikely to be rate limiting. With cooling or loss of the melt or fluid phase, diffusion rates become more important, as does heat flux out of the system. Lower diffusion rates impede efficient chemical communication of requisite components to reaction sites; consequently, the bulk rock composition becomes effectively partitioned into smaller compositional domains that are in local equilibrium, with gradients in chemical potential existing between them.

Multilayer coronas involving the spatial segregation of reaction products in layered corona bands arranged in order of increasing or decreasing chemical potential (Fisher, 1977; Joesten, 1977) are the most obvious manifestation of diffusion-controlled reactions. As changing  $P$  and  $T$  induces incipient reaction between contiguous metastable reactants, components will start to migrate between the reactants. If the major components display variable intergranular diffusivities, they will be partitioned into a continuum of compositional subdomains, or incipient "effective bulk compositions", in each of which local equilibrium is attained with its own unique chemical potentials. The width of the corona and each of its layers will be dictated by the different length scales of diffusion for each component. A layered corona assemblage develops, across which transient chemical potential gradients exist, which drive diffusion through the layers. With prolonged reaction or enhanced intergranular diffusion, component flux through the corona layers equalises chemical potentials at all points in the corona. Local incipient bulk compositions of subdomains gradually should expand with mass transfer across layers and approach the final steady-state effective bulk composition for the corona as a whole. Equilibrium is attained when no chemical potential gradients exist for any components, despite the spatial segregation of corona phases in layers. Diffusion is a consequence of the random motion of atoms, ions or molecules within a host reference frame (Mueller et al., 2010; Zhang, 2010). This random motion may result in a net diffusive flux when the concentration (or, rather, chemical potential) of a component is not uniform in that reference frame, (e.g., a reaction rim). The resultant diffusive mass transport in one dimension is governed by Fick's laws. Fick's First law relates diffusive component flux to component diffusivity in the presence of a concentration or chemical potential gradient:

Formatted: Line spacing: 1,5 lines

Formatted: Space After: 12 pt

$$J = -D \frac{\partial C}{\partial x} \quad (1)$$

In equation 1,  $J$  is the diffusive mass flux (a vector),  $D$  is the diffusion coefficient (or diffusivity),  $C$  is the concentration of a component (in mass per unit volume),  $x$  is distance, and  $\partial C/\partial x$  is the concentration gradient. Diffusivities are measures of the rate of component transport or diffusion. Values of diffusion coefficients (typically in  $\text{m}^2\text{s}^{-1}$ ) are dependent on temperature, pressure, composition, and the physical state and structure of the phase (Zhang, 2010). The time-dependence of diffusive mass transport (again in one dimension) and evolving concentration gradients are determined by Fick's second law:

$$\frac{\partial C}{\partial t} = D \frac{\partial^2 C}{\partial x^2} \quad (2)$$

Additional influences on evolving concentration gradients and diffusive flux in natural systems, which include the effect of bulk flow of the reaction framework, are quantified through extensions to Fick's laws (Mueller et al., 2010; Zhang, 2010).

Phenomenological models of corona formation through diffusion-controlled reaction employ a combination of Fick's First Law in conjunction with equilibrium thermodynamics (Fisher, 1970; Joesten, 1977; Foster, 1981). Fick's first law forms the basis for the first of these equations, which relates component fluxes  $J_i$  to chemical potential gradients  $d\mu_i/dx$  such that for each component  $i = 1$  to  $S$ ,

$$J_i = - \sum_{j=1}^S L_{ij} \frac{d\mu_j}{dx} \quad (3)$$

$L_{ij}$  are phenomenological coefficients for diffusion in an multi-component system (Joesten, 1977). Straight coefficients ( $i = j$ ) relate diffusion of component  $i$  to the chemical potential gradient of  $i$ , and the cross coefficients ( $i \neq j$ ) relate diffusion of component  $i$  to the chemical potential gradient of  $j$ . Joesten (1977) and Fisher (1970) assume that the contribution of terms involving cross-coefficients is negligible.

The Gibbs-Duhem equation relates component chemical potential gradients in the coronas to each other in the presence of a mineral  $k$ , in which the molar content of component  $i$  is  $n_{ik}$ , such that in a layer containing  $k$ ,

$$\sum_{i=1}^S n_{ik} \frac{d\mu_i}{dx} = 0 \quad (4)$$

A final equation relates the flux change between layers  $r-1$  and  $r$  to the stoichiometric coefficients  $v_k^r$  of phases  $k$  in the reaction at boundary  $r$ , such that for mass conservation and local mass balance at boundary  $r$ ,

Formatted: Line spacing: single

Formatted: Font: Italic

Formatted: Space After: 12 pt

Formatted: Font: Italic

Formatted: Font: Not Italic

Formatted: Font: Italic

$$J_i^r = J_i^{r-1} + \frac{d\varepsilon'}{dt} \sum_{k=1}^{\phi} n_{ik} v_k^r \quad (5)$$

In equation 5,  $\phi$  is the number of phases in layer  $r$  and  $\varepsilon'$  is the modified form of the reaction progress variable  $\varepsilon$  appropriate to layer growth (Ashworth & Sheplev, 1997). The factor  $\frac{d\varepsilon'}{dt}$  in equation 5 converts  $n_{ik} v_k^r$  (moles of component per mole of reaction progress) to  $J_i^r$  in its true units (mol component  $m^{-2}s^{-1}$ ).

Intrinsic to any corona formation model is mass balance. An overall reaction may be reconstructed using the measured proportion of phases to derive an open-system reaction, with boundary fluxes representing metasomatic interaction with the surrounding rock. The overall reaction may be summarised by a mass balance for each component  $i$ .

$$\sum_{k=1}^{\phi} v_k n_{ik} = 0 \quad (6)$$

In a closed system, the summation is over all minerals  $k$ . In an open system, the metasomatic fluxes at the end boundaries are treated as 'dummy' phases with unit stoichiometric coefficients. An expression for overall corona model reaction affinity was derived by Ashworth and Sheplev (1997). The reaction affinity is expressed as a function of phase compositions, phase proportions ( $v_k$ ), layer thicknesses and chemical potential gradients across all layers in equation 6:

$$(-\Delta G) = \sum_{k=1}^{\phi} v_k \sum_{i=1}^s n_{ik} \sum_{r=1}^{q^{k-1}} h^{r*} \left( \frac{d\mu_i}{dx} \right)^{r*} \quad (6)$$

Flatter chemical potential gradients reduce the  $(-\Delta G)$  accordingly, such that  $(-\Delta G)$  approaches zero, indicative of greater extent of equilibration. In contrast, large chemical potential gradients over thicker layers will cause the product  $(-\Delta G)$  to deviate further from zero, suggesting suppressed equilibration.

These equations predicate the steady-state diffusion-controlled models developed for spatially segregated reaction products in multi-layer coronas arranged in order of increasing or decreasing chemical potential (Fisher, 1977; Joesten, 1977; Mongkoltip and Ashworth, 1983; Foster, 1986; Grant, 1988; Johnson and Carlson 1990; Carlson and Johnson, 1991; Ashworth and Birdi, 1990; Ashworth et al., 1992; Ashworth and Sheplev, 1997; Markl et al., 1998; Ashworth et al., 1998; Dohmen & Chakraborty, 2003; Gardes et al., 2011). As changing  $P$  and  $T$  induces incipient reaction between contiguous metastable reactants, components will start to migrate between the reactants. If the major components display variable intergranular diffusivities, they will be partitioned into a continuum of compositional subdomains, or incipient "effective bulk compositions", in each of which local equilibrium is attained with its own unique chemical potentials. The width of the

Formatted: Space After: 12 pt

Formatted: Font: Times New Roman, Not Italic, Check spelling and grammar

corona and each of its layers will be dictated by the different length-scales of diffusion for each component. A layered corona assemblage develops, across which transient chemical potential gradients exist, which drive diffusion through the layers. With prolonged reaction or enhanced intergranular diffusion, component flux through the corona layers equalises chemical potentials at all points in the corona. Local incipient bulk compositions of subdomains gradually should expand with mass transfer across layers and approach the final steady-state effective bulk composition for the corona as a whole. Equilibrium is attained when no chemical potential gradients exist for any components, despite the spatial segregation of corona phases in layers.

The interpretation of corona textures has traditionally been a primary diagnostic tool for inferring metamorphic  $P$ - $T$ - $t$  paths and, hence, tectonics (Whitney and McLelland, 1973; Grew, 1980; Joesten, 1986; Droop, 1989; Clarke et al., 1989; Ashworth et al., 1992; White and Clarke, 1997; Norlander et al., 2002; White et al., 2002; Kelsey et al., 2003b; Johnson et al., 2004; Tsunogae and Van Reenen, 2006; Zulbati and Harley, 2007; Hollis et al., 2006). ~~Diffusion-Kinetically~~ constrained conditions may arise on both the prograde and retrograde paths but, typically most commonly, coronas are thought to have formed during retrogression from peak  $P$ - $T$  conditions as ~~univariant, or at least very~~ low variance equilibria are crossed. The topology of the inferred ~~univariants~~ low variance equilibria with respect to the peak assemblage has commonly been used to constrain a retrograde  $P$ - $T$  path (Harley, 1989). ~~Retarded reaction progress under retrograde conditions owing to sluggish reaction kinetics manifests as incomplete reaction between peak phases to produce layered, finely crystalline, spatially segregated reaction products, which armour the peak phases from further reaction.~~

The inherent assumption of disequilibrium between reactants and corona products was elegantly questioned in a study by White et al. (2002) on metapelites from the Musgrave Block in Australia. Phase equilibria modelling employing pseudosections in KFMASHTO demonstrated that corona textures could realistically be developed in a peak, high variance, assemblage that remains in equilibrium but undergoes large changes in mineral modes as the  $P$ - $T$  path tracks through the phase field. Thus, it may not be necessary to invoke crossing of ~~low variance equilibria~~ univariants and disequilibrium to explain corona textures. Indeed, the amount of decompression required to generate the equilibrium reaction texture described by White et al. (2002) was comparatively minor and may well have been overestimated by earlier workers (Harley, 1989). Similarly, incomplete reaction may not be assumed ~~White & Powell (2011), also urge caution in assuming incomplete reaction progress~~ in coronas where the cessation of textural development reflects the consumption of melt, in which case the reaction responsible has gone to completion White & Powell (2011).

Whilst there is a general understanding of the processes that induce corona formation (e.g., Harley, 1989; White et al., 2002; Johnson et al., 2004; White et al., 2008), the mechanism for corona development is ~~obscured~~ poorly known since the final steady-state configuration of corona layers observed in a rock reflects the complex evolution of chemical potential relationships with  $P$ ,  $T$  and bulk composition. These same complexities must also govern metamorphic processes on the prograde path, albeit at larger length scales. However, greater melt or fluid volumes and increasing temperatures on the



prograde path facilitate equalisation of chemical potentials through accelerated diffusion in the assemblage, such that only the spatial sequestration of phases (for example, between melt-rich leucosomes and melt-poor mesosomes) attests to the compositional partitioning of the rock and attendant chemical potential gradients that must have prevailed during diffusion-controlled reaction (White et al., 2004). In coronas, transient disequilibrium is frozen in the rock as reaction textures. Coupled with experimental work, they present the best petrographic evidence available to us to allow the study of the evolution of chemical potential gradients governing the reorganization of components within a rock with changing P-T-X conditions (e.g., White et al., 2008). In coronas, disequilibrium is frozen in the rock, preserving incipient reaction textures. They are, therefore, the best petrographic evidence available to us to allow the study of the evolution of chemical potential gradients governing the reorganization of components within a rock with changing P-T-X conditions (e.g., White et al., 2008).

### 3 Corona growth models

Two ~~distinct paradigms~~ end-member corona formation models have evolved in the last four decades to explain development of multi-layered coronas, namely, synchronous, continuous, single-stage, steady-state (e.g., Ashworth and Sheplev, 1997) and non-discontinuous, sequential (Joesten 1986; White and Clarke, 1997) diffusion-controlled growth. The formation mechanism for an individual corona is typically governed by either of these two endmember models predominantly. Since each end-member model is governed by reaction processes which limit their petrogenetic significance, determining the extent to which a particular formation mechanism applies when studying granulite corona evolution is distinguishing between the two mechanisms for corona formation is thus critical when using them to infer ~~infering~~ information regarding the P-T-X path from them ~~path for a rock~~ (White & Powell, 2011).

#### 3.1 ~~Continuous, s~~Single-stage, steady-state, diffusion-controlled corona growth (SSDC)

~~The This single-stage, steady-state multilayer~~ growth model attributes corona development to diffusion-controlled reaction mechanisms at constant pressure and temperature, with-utilising local equilibrium and chemical potential gradients across each layer and the corona as a whole (Fig. 1). The spatial segregation of phases into layers reflects relative mobility of components owing to variable intergranular diffusivities rather than distinct P-T conditions. All layers in the reaction bands coexist contemporaneously with infinitesimal thickness at the incipient stages of reaction. ~~Only-1~~ Layer thickness increases with reaction duration and no change to ~~the internal structure of the a~~ corona layer sequence occurs. Chemical potential gradients evolve toward a steady-state and ~~constant~~ final configuration balancing the rate of production and consumption of each component within each layer (Korzhinskii, 1959; Joesten, 1977; Mongkoltip and Ashworth, 1983; Foster, 1986; Grant, 1988; Johnson and Carlson 1990; Carlson and Johnson, 1991; Ashworth and Birdi, 1990; Ashworth et al., 1992; Ashworth and Sheplev, 1997; Markl et al., 1998; Ashworth et al., 1998).

**Comment [P3]:** In this section we discuss the two end-member corona formation models.

**Formatted:** Line spacing: 1,5 lines

**Formatted:** Font: Not Bold, Italic, Font color: Auto

**Formatted:** Font: Not Bold, Italic, Font color: Auto

**Formatted:** Line spacing: 1,5 lines

Figure 1 ~~demonstrates-illustrates~~ incipient stages of ~~SSDC-single-stage, steady-state~~ corona formation chemographically and in chemical potential space by considering two phases (A and D) initially at equilibrium under  $P_1$  and  $T_1$  with bulk composition indicated by the circle (Fig. 1a). If ~~under~~ new  $P$  and  $T$  conditions ( $P_2, T_2$ ) ~~are kinetically inhibited and~~ reaction ~~progress-rate becomes-is~~ diffusion-controlled, relative differences in intergranular diffusivities partition the original bulk composition (circle) into two endmember, non-overlapping, local bulk compositions (square, triangle, ~~)-intermediate between the reactant compositions-~~ (Fig. 1b). The ~~resulting~~ product mineral assemblage ~~forms~~ layers ~~that~~ are spatially segregated ~~but~~ in local equilibrium and comprise the mineral assemblage stabilised in each local effective bulk composition; ~~i.e., the local bulk composition indicated by the square stabilises assemblage BCD and, similarly, the bulk composition indicated by the triangle stabilises assemblage ABC~~ (Fig. 1b). A ternary  $G$ - $X$  surface (Fig. 1c) indicates that the tangent planes to the minimum free energy assemblages have different orientations and, accordingly, components have different chemical potentials in each assemblage. The coexistence of two local juxtaposed equilibria buffers the chemical potentials of diffusing components across the coronas (Joesten, 1977). Figure 1d represents the associated isothermal-isobaric chemical potential saturation surface for each of the local phase assemblages (modified after Joesten, 1977). Each local bulk composition, represented by a three-phase assemblage, is invariant in chemical potential space at constant  $P$  and  $T$ . The invariant assemblage ABC (triangle) lies at a higher chemical potential for component 3 and lower chemical potentials for components 1 and 2, than does the invariant assemblage BCD represented by the square. A projection of the saturation surface on the  $\mu_{\text{comp1}}-\mu_{\text{comp2}}$  plane (~~Fig. 1e~~) more clearly indicates the difference between chemical potentials for each local equilibrium (~~Fig. 1e~~). Maintenance of these local equilibria requires that chemical potential gradients must exist across each layer and, thus, that the system as a whole is in disequilibrium, which drives diffusion of components from one compositional domain to another. Chemical potential differences across each layer adjust to steady-state values that balance the rates of production and consumption of each component within the layer (Joesten, 1977). Chemical potential gradients for rapidly diffusing components may be eliminated across the corona, whilst those for the slowest moving components (typically Al and Si, ~~e.g., Ashworth & Sheplev, 1997~~) are maintained, establishing partial equilibrium.

Continued corona evolution entails the growth of a layer assemblage at the expense of its neighbour ~~by reaction with the diffusing components-~~ (Joesten, 1977). The relative diffusive fluxes of components in adjacent layers determine which mineral phases are consumed and produced at each layer boundary, as well as the reaction stoichiometry (Joesten, 1977; Fisher, 1977). All mineral layers grow ~~at the same timesimultaneously~~, by a set of ~~diffusion-controlledpartial~~ reactions at ~~the layer contacts-interfaces which liberate-liberating and consume-consuming~~ components in ~~the~~ appropriate proportions to account for mass balance in the overall system (Joesten, 1977, 1986; Fisher, 1977). The only layer that grows at both contacts is the layer that initially contained the original reactant interface (Joesten, 1977; Joesten, 1986). Fisher (1973) demonstrated that diffusion will automatically tend to shift potentials toward values such that the flux differences at every point in a corona balance local reactions, thereby establishing a steady-state configuration. Growth of coronas will ~~slow decelerate~~ and eventually cease ~~when either diffusive transport becomes inefficient or either when diffusion paths become too~~

Formatted: Font: Not Bold, Italic,  
Font color: Auto

~~tortuous and long~~; chemical potential gradients ~~approach values too low to drive significant diffusion~~~~are erased~~; and/or intergranular diffusivities are reduced with cooling during retrogression (Joesten, 1977; Fisher, 1977; Ashworth and Sheplev, 1997).

The corona in Fig. 2 is a schematic reconstruction of those described by Johnson and Carlson (1990) from metagabbros in the Adirondack Mountains that they interpreted as a natural example of ~~single stage, steady state, diffusion controlled growth at constant P and T~~~~this corona formation mechanism~~. During granulite facies metamorphism a primary igneous assemblage involving contiguous olivine and plagioclase (Fig. 2a) becomes unstable ~~during granulite facies metamorphism~~ and is replaced by a new stable assemblage (Fig. 2b) ~~involving~~~~eluding~~ orthopyroxene, clinopyroxene, plagioclase and garnet, ~~i.e., *Ol + Opx + Cpx + Pl + Grt + Pl* (reactants in italics)~~(Fig. 2b). ~~As rates of P-T change exceed rates of intergranular diffusion in the dry mafic bulk composition, diffusion controlled reaction ensues.~~ Variable relative rates of intergranular diffusion manifest as spatially segregated product layers, depending on the diffusional ~~range-length scale~~ of each component, and the corona domain is partitioned into a continuum of compositional subdomains or incipient effective bulk compositions in which local equilibrium is attained, each with unique chemical potentials (Fig. 1). ~~Since Al is the slowest diffusing component, the most aluminous product phase adjoins the most aluminous reactant and asymmetric~~ ~~Asymmetric~~ composition profiles for ~~slower diffusing~~ species are established across product bands ~~reflecting variable intergranular diffusivities~~, e.g., Al content in product bands increases toward the Al-rich reactant. Fe, Mg and Si released from olivine diffuse down chemical potential gradients toward plagioclase, whereas Na, Ca, Al and Si released from plagioclase diffuse toward olivine. Reactions occur at layer ~~boundaries-interfaces~~ and layers expand as ~~diffusion-element flux~~ progresses (Fig. 2b). ~~The width and composition of each corona layer depend on the relative fluxes of the diffusing elements.~~ Inherent in the model is that the product mineral assemblage does not change as reaction proceeds. With time, chemical potentials and fluxes approach steady-state values. Mg, Ca, Na and Al ~~migrate~~ ~~are imported~~ into the corona and Fe and Si ~~are exported~~~~move out~~ from the corona. Minor spinel ~~clouding~~ occurs in reactant plagioclase as Ca and Si diffuse preferentially into the reaction band, creating a Si deficiency that stabilises spinel in relict reactant plagioclase (Johnson and Carlson, 1990).

### 3.2 ~~Non-continuous,~~ ~~s~~Sequential, diffusion-controlled corona growth

~~The~~ ~~This sequential, diffusion controlled~~ corona ~~layer~~ growth model involves successive, step-wise, growth of layers, leading to overprinting and partial re-equilibration of younger ~~corona~~ layers as new equilibria are encountered on either the prograde or retrograde path. These changes are typically triggered by changing *P* and/or *T* but can also be triggered through changing component fluxes through the corona as a function of evolving local effective bulk compositions (e.g., Griffin, 1972; Griffin and Heier, 1973; Joesten, 1986; Droop, 1989; Indares, 1993; White et al., 2002; Johnson et al., 2004; Štípská et al., 2010; Baldwin et al., 2015). In contrast to the single-stage, steady-state model, the internal layer configuration of the corona reaction band evolves with time as new layers develop and old layers are resorbed. Relative diffusion fluxes and

Formatted: Line spacing: 1,5 lines

attendant chemical potential differences shift and evolve from one steady-state configuration to another under new  $P$ - $T$ - $X$  conditions.

Sequential corona development with changing  $P$  and  $T$  has been demonstrated in prograde coronas found in mafic rocks between olivine and plagioclase by Griffin (1972) and Mork (1986). ~~He~~ Griffin (1972) derived a sequential model for corona formation that involved cooling from ~~igneous~~ temperatures in excess of the dry basalt solidus (>1200 °C), ~~at~~ between 0.8 and 1.1 kbar-GPa and crossing of univariant equilibria (Figs. 3 and 4). Initially, olivine and plagioclase crystallised at point A, ~~but~~ as the rock cooled, it was buried and followed the path delineated by the arrow in Fig. 4. At point B, the olivine and plagioclase reacted to produce Tschermakitic clinopyroxene (Cpx I) and aluminous orthopyroxene (Opx I; Fig. 3a). As the rock tracked through  $P$ - $T$  space from B to C (Fig. 4), the clinopyroxene (Cpx I) exsolved spinel and anorthite to form a less  
10 Tschermakitic clinopyroxene (Cpx II; Fig. 3b). This clinopyroxene was partly consumed at point C (Fig. 4) to produce garnet and a jadeitic clinopyroxene (Cpx III; Fig. 3c). Further cooling into the eclogite facies produced omphacitic clinopyroxene and garnet with lesser quartz at point D (Fig. 3d). Finally, decompression on exhumation induced the exsolution of the jadeite component from omphacite to yield diopside (Cpx IV) and plagioclase towards point E (Figs. 3e and 4).

~~Mork (1986) also invoked a sequential model for corona formation between olivine and plagioclase in western Norway as a result of a clockwise  $P$ - $T$  path.~~

Sequential corona development may also occur at constant  $P$  and  $T$  through changes in the effective element fluxes across the corona band. A multilayer corona may evolve in a steady or quasi-stationary state controlled by diffusion (single-stage, steady-state growth) and then subsequently modify through back-retrograde reaction between two adjacent layers at constant  
20  $P$  and  $T$  through changing composition of the effective equilibration volume as the composition of a reactant evolves with protracted reaction. Brady (1977) and Vidale (1969) introduced a modification to the steady-state model that was first used to explain corona variability-variability in coronal layer development between the same reactants by Johnson and Carlson (1990). Vidale (1969) modelled the development of calc-silicate bands in a system with waning availability of certain components. According to his model, rapidly diffusing components in a reaction band will eventually eliminate their  
25 chemical potential gradients. The chemical potentials of ~~these~~ rapidly diffusing components in the phases comprising the corona assemblage are then then determined by equivalent to those in matrix phases equilibria outside ~~of~~ the corona band. As the number of components exerting a diffusive control on the reaction is reduced by one, so one mineral phases is are lost from the band (Vidale, 1969, Brady, 1977). This manifests as ‘cannibalisation’ of corona layers comprising the rapidly diffusing components. The original steady state is modified as the system enters a transient state that will evolve through  
30 time toward a new steady state with constant chemical potential gradients.

Johnson and Carlson (1990) employed the sequential development model to explain the variability in corona product assemblages developed between plagioclase and olivine in a mafic granulite from the Adirondack Mountains (plagioclase (Ol|Opx|Cpx|Pl|Grt|Pl) – Fig. 5). As the reactant plagioclase was gradually ~~exhausted~~ ~~depleted~~ in Ca and Si, it was converted from labradorite to andesine + spinel (Fig. 5a). This modification of the chemical potentials of Ca and Si by equilibria outside of the corona band manifests as the destabilisation and subsequent ‘cannibalisation’ of: first, the plagioclase corona layer and then the clinopyroxene layer (Fig. 5a, b), as the system evolved toward a new steady-state scenario with constant chemical potential gradients. According to Johnson and Carlson (1990), all corona bands were initially plagioclase- and clinopyroxene-bearing, but then evolved to different final configurations with greater or lesser cannibalisation of these phases, depending on the availability of Ca and Si in the surrounding phases. Where the olivine grain adjoins the spinel-poor plagioclase (originally less calcic, An<sub>43</sub>), both product plagioclase and clinopyroxene have been consumed, and the orthopyroxene is in contact with garnet (Fig. 5b, c). In contrast, where olivine is adjacent to spinel-rich reactant plagioclase (originally more calcic, An<sub>56</sub>), corona plagioclase and clinopyroxene are retained (Fig. 5c).

Sequential layer development in a corona through variation of *P*, *T* and changing bulk composition of the corona reaction volume was invoked by Indares (1993) to explain coronas between olivine and plagioclase in an olivine gabbro from the Shabogamo Intrusive Suite, Eastern Grenville Province (Ol|Opx|Cpx|Pl|Grt|Pl – Fig. 6). Initially, ~~at high *P* and *T*, under eclogite facies conditions,~~ calcic plagioclase reacted with olivine to form orthopyroxene and garnet coronas at high *P* and *T*, under eclogite facies conditions, (Fig. 6a). The relative difference in intergranular diffusivities of components ~~manifests as results in~~ two distinct corona layers ~~over which chemical potential gradients exist~~, grading from aluminous-Al-rich garnet adjacent to plagioclase to (Al-poor) orthopyroxene adjacent to olivine. Excess Al in the plagioclase was accommodated by the formation of corundum (Fig. 6a). At the same pressure and temperature, the garnet layer grew by reaction between calcic plagioclase and corona orthopyroxene in a local effective bulk composition different from that which produced the initial corona orthopyroxene and garnet, which included olivine (Fig. 6b). Continued reaction generated excess Si and Al in the reactant plagioclase, which reacted with corundum to form kyanite (Fig. 6b). In Fig. 6c, the reactant plagioclase is relatively enriched in Na through the two former reactions. Na then diffused out of plagioclase and reacted with corona orthopyroxene and garnet to form omphacite. In response, more kyanite formed in the plagioclase to accommodate excess residual Si and Al. With subsequent exhumation and decompression, corona garnet reacted with kyanite and corundum in plagioclase to form spinel and more calcic plagioclase (Fig. 6d). In addition, garnet reacted with omphacite and some excess Si to produce intervening plagioclase.

The sequential development of symplectites in pelitic rocks has been elegantly modelled using calculated phase diagrams involving chemical potentials for coupled spinel+plagioclase symplectites and monomineralic plagioclase coronas after kyanite (Ky|Spl+Pl|Pl|Otz+Fsp) by Štípská et al. (2010) and Baldwin et al. (2015). With isothermal decompression from peak conditions, kyanite ~~was~~ no longer stable and a zoned monomineralic plagioclase layer ~~formed~~ between the kyanite

and matrix with quartz in excess and only  $\text{Al}_2\text{O}_3$  considered immobile. As the plagioclase layer evolves, the diffusion of  $\text{SiO}_2$  through the plagioclase layer from the matrix was retarded and the local equilibrium volume encompassing the kyanite and plagioclase layer contact becomes a silica-deficient one. The chemical potential of  $\text{SiO}_2$  at the kyanite contact was accordingly lowered sufficiently to stabilise spinel in a symplectically intergrown with plagioclase.

#### 4 Controls on corona development in granulites

Of all the substantive literature references to corona textures, only a few do not relate to compositions that are neither pelitic or mafic bulk compositions. Appendix 1 presents details of prograde coronas in the literature, whereas Appendix 2 comprises a selection of the more numerous references to coronas formed during retrograde re-equilibration. Selected coronas from mafic and pelitic rocks are schematically illustrated in Figures 7 and 8, respectively. The assemblages and microstructure in coronas in both pelitic and mafic rocks vary considerably depending on (a) metamorphic conditions ( $P$ ,  $T$  and  $a\text{H}_2\text{O}$ ), (b) inferred formation mechanism through either steady-state and/or sequential layer development, (c) reactant compositions, (d) diffusion kinetics reaction kinetics, and (e) the amount of deformation or strain intensity on either the prograde or retrograde path.

#### 4.1 Pressure, temperature and $a\text{H}_2\text{O}$

Pressure, temperature and  $a\text{H}_2\text{O}$  conditions determine which mineral phases form within the corona. In olivine gabbros or troctolites from the Adirondack Highlands, coronal assemblages vary from  $Ol | \text{Opx} + \text{Cpx} | \text{Grt} | Pl$  (reactants in italics; abbreviations after Kretz, 1983) in the northeast (Johnson and Carlson, 1990 – Fig. 5a) to  $Ol | \text{Opx} | \text{Cpx} + \text{Spl} | Pl$  in the southwest (Whitney and McLelland, 1973 – Fig. 7a), with the presence of garnet in the former being attributed to higher pressures towards the northeast. In the Newer Basic Intrusion of NE Scotland, the coronal assemblage  $Ol | \text{Opx} | \text{Hbl} + \text{Spl} | Pl$  is observed (Mongkoltip and Ashworth, 1983 – Fig. 7b). In this case, Hbl hornblende is favoured over Cpx clinopyroxene under higher  $a\text{H}_2\text{O}$  conditions. Similarly, the dominance of hornblende in the corona assemblage between garnet and clinopyroxene described in Carlson and Johnson (1991) (Fig. 7c) versus the restriction of pargasite to the layer closest to garnet in the coronas described by Baldwin et al. (2004) (Fig. 7d), is attributed to higher  $a\text{H}_2\text{O}$  in the former corona compositional domain.

In metapelites, coronas after sapphirine and quartz comprise the sequence  $Spr | \text{Sil} | \text{Opx} | Qtz$  at higher pressures, but  $Spr | \text{Sil} | \text{Opx} + \text{Crd} | Qtz$  at lower pressures and temperatures and/or higher  $a\text{H}_2\text{O}$  conditions (e.g., Lal et al., 1987). Coronas after gedrite and kyanite from the Thor Odin Dome in British Columbia comprise the sequence  $Ged | \text{Crd} | \text{Crd} + \text{Spl} \text{ symplectite} | \text{Crd} + \text{Crn} \text{ symplectite} | Ky$  (Norlander et al., 2002 – Fig. 8a). The lower-temperature equivalent corona (assuming minimal bulk compositional differences) is  $Ged | \text{Crd} | \text{St} | Ky$ , which is seen in the Errabiddy metapelitic granulites in Western Australia (Baker et al., 1987).

Formatted: Line spacing: 1,5 lines

Formatted: Line spacing: 1,5 lines

#### 4.2 Sequential versus single-stage corona formation mechanism

Corona assemblages are also governed by the mechanism by which they formed, i.e., either in a single-stage, steady-state event, ~~or~~ as sequential layers in response to varying pressure, temperature or component fluxes into the reaction volume; or by a mechanism intermediate between these two end-member formation models. ~~Johnson and Carlson (1990) characterised a range of corona textures between olivine and plagioclase in the Adirondacks, New York (Fig. 2 and Fig. 5) and attributed different corona configurations to varying extents of internal corona cannibalisation with waning Ca and Si fluxes across the corona depending on the original composition of the plagioclase reactant. Alternatively, intervening layers may develop with cooling as length scales of diffusion become more constrained and the corona compositional domain partitions into smaller-volume local equilibria in which a secondary corona assemblage may develop by reaction between two contiguous layers at new *P* and *T* conditions (e.g., Griffin, 1972; Brandt et al., 2003).~~ Most coronas listed in Appendices 1 and 2 appear to be interpreted via the single-stage, steady-state model, but ~~sequential-growth~~ models in which sequential growth dominates are relatively invoked commonly.

Determining which model of corona formation is applicable in a specific context is commonly difficult but vital if information on the *P-T* path is to be gleaned correctly from the corona (White and Clarke, 1997). This is critically evident in contrasting interpretations of the coronas formed between olivine and plagioclase in metagabbros from Risor, Norway (Joesten, 1986; Ashworth, 1986).

Joesten (1986) cited textural evidence and the diffusional instability of any closed-system, steady-state, diffusion model for the coronas in support of a model involving a primary magmatic origin for the coronas, followed by secondary annealing. He suggested that cusped olivine-orthopyroxene contacts, thickening of orthopyroxene layers at narrow terminations of olivine grains, irregular contacts between orthopyroxene-spinel and amphibole-spinel layers, and ~~sectoral~~ heterogeneity in the corona assemblage developed depending on the adjacent magmatic phase (i.e., either plagioclase, amphibole or clinopyroxene) are all inconsistent with a diffusion-controlled origin. ~~He suggested that~~ these features were thought to be more likely a result of olivine dissolution in a melt, followed by the sequential growth of corona layers with cooling at magmatic temperatures above the olivine-plagioclase stability field. Joesten (1986) proposed that these primary magmatic coronas were diffusively unstable and that they were spontaneously partially to completely annealed on cooling.

In contrast, Ashworth (1986) suggested the Risor coronas formed by single-stage, steady-state, diffusion-controlled replacement of plagioclase and olivine with an open-system modification to mass-balance model constraints. Textural evidence apparently inconsistent with a diffusion model was attributed to locally variable kinetic controls on reaction mechanism, for example, epitaxial growth of tabular amphibole on magmatic grains versus heterogeneous nucleation at reactant contacts. Ashworth (1986) did not address the sectoral heterogeneity of the coronas nor the irregular contacts between amphibole-spinel and orthopyroxene-spinel layers; ~~however,~~ however, it is conceivable that variation in the bulk

composition of the equilibration volume - both spatially and temporally as reaction proceeded - may account for such heterogeneity (e.g., Johnson and Carlson 1990).

Alternative sequential models of corona formation, invoking varying  $P$ ,  $T$  and/or boundary fluxes, may similarly have important implications for reconstruction of  $P$ - $T$  paths. For the same corona textures between olivine and plagioclase in the New York Adirondacks (Figs. 2, 5, and 6), three different  $P$ - $T$  paths were constructed by Griffin (1972), Johnson and Carlson (1990) and Indares (1993), respectively, based on their inferences about the drivers behind the corona reactions, namely, changing pressure and temperature (Griffin, 1972; Joesten, 1986), changing component fluxes (Johnson and Carlson, 1990), or a combination of all three parameters (Indares, 1993). Mass-balance constraints and compositional zonation within each corona assemblage were cited in each case in support of the adopted model. ~~Johnson and Carlson (1990) attributed different corona configurations to varying extents of internal corona cannibalisation with waning Ca and Si fluxes across the corona that were dependent on the original composition of the plagioclase reactant. Alternatively, intervening layers may develop on a more local scale with cooling as length scales of diffusion become more constrained and the corona compositional domain partitions into smaller volume local equilibria in which a secondary corona assemblage may develop by reaction between two contiguous layers at new  $P$  and  $T$  conditions (e.g., Griffin, 1972; Brandt et al., 2003).~~

Criteria for the identification of single-stage, steady-state layer growth include mineral zonation and a marked spatial organisation of product reaction bands such that each layer represents a 'non-overlapping volume in compositional space' (Joesten, 1977; Fisher, 1977), all arranged in an orderly sequence of increasing or decreasing chemical potential (Fisher, 1977). If the corona has not attained equilibrium, asymmetric composition profiles in minerals within a corona layer and in the corona as a whole are consistent with chemical potential gradients induced by relative differences in intergranular diffusion rates of components at approximately constant  $P$ - $T$  conditions (Indares, 1993, White and Clarke, 1997). In contrast, a sequential corona model predicts symmetric, radial zoning of phases with respect to grain boundaries. Mass balance constraints commonly preclude the formation of an intervening layer by reaction between two initially contiguous layers in a sequential model. This necessitates the diffusion of requisite components from outside the limits of the immediate equilibration volume within a single-stage, steady-state diffusional regime. Even so, evidence may be equivocal and it may not be possible to exclusively establish single-stage, diffusion-controlled multilayer corona growth from step-wise, sequential growth in response to changing  $P$ - $T$  conditions or component fluxes. In these cases, the corona formation mechanism is likely reflects a combination of both end-member corona models. †Tectonic context and structural data might provide independent constraints favours one model over the other on the relative contributions of either end-member model to the overall corona formation mechanism. Ultimately, clarification is best attained by modelling the spatial arrangement of textures in a series of chemical potential phase diagrams, which allow the full range of possible textural configurations given different formation mechanisms to be evaluated (White & Powell, 2011; Štípská et al., 2010; Baldwin et al., 2015).



### 4.3 Reactant compositions

The compositions of local reactants principally determine the effective bulk composition of the corona, with a minor degree of open-system communication with matrix ~~beyond the immediate reactants~~. The most obvious manifestation of local compositional control on corona configuration is demonstrated by the three main types of coronas observed in mafic rocks, where metasomatic exchange with the enclosing rock is minimal and the corona bulk composition is principally determined by the reactants. Local corona bulk compositions comprising orthopyroxene, clinopyroxene, plagioclase and garnet form after olivine and plagioclase ( $Ol | Opx | Cpx | Pl | Grt | Pl$  – Fig. 2, 3 and 5). More aluminous, hydrous corona bulk compositions after garnet and clinopyroxene ~~with an externally derived H<sub>2</sub>O rich fluid~~ stabilise amphibole, plagioclase and orthopyroxene ( $Grt | Prg | Pl | Cpx/Opx | Cpx$  – Fig. 7c, d). Commonly, clinopyroxene reacts with plagioclase to yield clinopyroxene (with or without orthopyroxene), quartz and garnet coronas ( $Cpx | Cpx/Opx | Qtz | Grt | Pl$  – Fig. 7e, f).

Markl et al. (1998) described coronas after fayalite and K-feldspar or plagioclase ( $Fa | Opx | Grt+Opx | Pl/Kfs$ ), in which the layer thicknesses, product proportions and their compositions vary systematically depending on whether plagioclase or K-feldspar is the reactant. Carlson and Johnson (1991) described a corona after garnet and quartz in a metagabbro from the Llano Uplift in Texas comprising the layer sequence  $Grt | Pl+Mgt | Opx+Aug | Qtz$ . In metapelites, coronas after garnet and quartz typically yield a coronal assemblage of  $Grt | Crd+Opx | \pm Pl | Opx | Qtz$  (Hollis et al., 2006 – Fig 8b). The presence of augite, plagioclase and magnetite in ~~the~~ metagabbro corona may be attributed to significantly more calcic garnet (~8 wt% CaO) with a higher  $X_{Fe}$  than typical pelitic garnets. Van Lamoen (1979) and Nishiyama (1983) reported coronas after olivine and plagioclase in metamafic rocks and conclusively demonstrated a correlation between the compositions of reactant olivine and product orthopyroxene.

Sectoral development in complex coronas is perhaps the most obvious manifestation of reactant compositional control on corona mineralogy and morphology. Kelsey et al. (2003b) described sectoral development of coronas around garnet in pelitic granulites from the Mather paragneiss in the Rauer Group, Antarctica (Fig. 8c). In these granulites, garnet is enclosed by a complex corona that comprises  $Grt | Crd+Opx$  symplectite  $| Opx | Qtz$  where garnet was initially adjacent to quartz and  $Grt | Crd+Opx$  symplectite  $| Pl | Bt$ , where initially adjacent to biotite. These corona sectors appear to define unique, highly localised, effective bulk compositions. The sharp changes in mineral proportions between sectors attests to the limited degree of chemical communication between the  ~~$Grt+Bt$~~  and  ~~$Grt-Grt+Qtz$~~  compositional domains. Bruno et al. (2001) described coronas after biotite and quartz or feldspar, in which corona mineralogy varies around a single biotite grain from  $Bt | Grt | Qtz$  where biotite abuts quartz, to  $Bt | Grt | Grt+Qtz | Phg+Qtz | Kfs$  where biotite is adjacent to K-feldspar and  $Bt | Grt | Grt+Jd | Pl$  where plagioclase encloses biotite (Fig. 8d). Štípská et al. (2010) noted complex radial and sectoral heterogeneity in coronas after kyanite (Fig. 8h). Where kyanite is enclosed by plagioclase-K-feldspar-quartz matrix, it is replaced by a reasonably uniform corona comprising  $Ky | Pl+Sp \pm Crn$  symplectite  $| Pl | Matrix$ . The monomineralic plagioclase layer is strongly zoned with respect to anorthite content, grading from  $X_{An} = 0.45$  to 0.20 adjacent to the matrix.

Formatted: Line spacing: 1,5 lines

Formatted: Font: Not Bold, Italic, Font color: Auto

Formatted: Font: Not Bold, Italic, Font color: Auto

Locally, where kyanite abuts garnet from the peak assemblage, the plagioclase-spinel symplectite is absent and a thin Ca-poor garnet monomineralic layer is rather developed, which is in turn enclosed by unzoned monomineralic plagioclase. Štípská et al. (2010) ascribed the antipathetic occurrence of the garnet corona layer and the spinel+plagioclase symplectite to higher FeO and MgO chemical potentials in the equilibration volume encompassing both garnet and kyanite as a reactant, which stabilised garnet in the calculated product phase equilibria.

#### ~~4.4 Diffusion kinetics~~ Reaction Kinetics - Diffusion

The spatial array of corona product bands and the presence or absence of associated symplectite is a function of ~~diffusion kinetics, i.e.,~~ relative intergranular diffusivities of major system components. Typically, Al and Si are relatively immobile compared to more rapidly diffusing components such as Fe, Mg and, to a lesser extent, Ca (e.g., Johnson and Carlson, 1990; Carlson and Johnson, 1991; Ashworth and Birdi, 1990; Ashworth et al., 1992; Ashworth and Sheplev, 1997). In natural coronas that ~~have formed~~ are inferred to have formed in a single-stage, steady-state, diffusion-controlled scenario, typically limited Al diffusion manifests as both modal and phase compositional zonation in the corona, i.e., Al-rich minerals occur in layers closest to the aluminous reactant and, within these layers, the corona minerals exhibit asymmetric zonation in compositional profiles, e.g.,  $\gamma(\text{Opx})$  increases toward the Al-rich reactant. Since Fe and Mg typically diffuse more rapidly than Al, ferromagnesian minerals tend to segregate into layers farthest from the aluminous reactant.  $X_{\text{Fe}}$  varies across the corona depending on relative ~~intergranular diffusion length-scales~~ diffusivities of Fe and Mg. Coronas after sapphirine and quartz in metapelites (Ellis et al., 1980 – Fig. 8e) and between sillimanite and orthopyroxene (Kriegsman et al., 1999; Appendix 2) demonstrate spatial segregation of aluminous corona layers (sillimanite and sapphirine, respectively) from more Fe- and Mg-rich corona products (orthopyroxene and cordierite, respectively). Coronas after garnet and clinopyroxene in more mafic bulk compositions segregate into pargasite adjacent to garnet and orthopyroxene+plagioclase adjacent to clinopyroxene (Baldwin et al., 2004 – Fig. 7d).

~~Kinetically constrained~~ Diffusion-controlled reaction rates arise most commonly on the retrograde  $P$ - $T$  path (Appendix 2) in melt-depleted, ~~residual~~ high bulk rock compositions. In metapelites, coronal reaction textures are commonly attributed to near-isothermal decompression following peak conditions on a clockwise  $P$ - $T$  path (e.g., coronas after garnet and quartz; Kelsey et al., 2003b – Fig. 8c) or to near-isobaric cooling (e.g., coronas after sapphirine and quartz; Grew, 1980 – Fig. 8e). White et al. (2002), however, urge caution in inferring large amounts of decompression and cooling along the retrograde path to produce corona textures; phase equilibria modelling of spinel-bearing symplectites after garnet from an Fe-rich pelitic granulite in the Musgrave Block, Australia (Fig. 8f), suggested to them that coronas might develop on any number of retrograde  $P$ - $T$  path trajectories through a high-variance field in which the mode of garnet is decreasing while that of the corona products is increasing. Thus, ~~large~~ large amounts of decompression are, ~~thus,~~ not required to produce coronas and symplectites after garnet and, hence, estimates of decompression from other terranes (e.g., Harley, 1989) may well have been overestimated.

Formatted: Line spacing: 1,5 lines

Coronas developed on the prograde path (Appendix 1) are far less common than coronas that form ~~after peak phases~~ during retrogression (Appendix 2), owing largely to more prolonged reaction duration; ~~the presence of a melt or fluid and, hence, that promote~~ greater length-scales of diffusion; ~~and/or associated~~ deformation on the prograde path. Thus, the ~~diffusion-constrained kinetically constrained conditions~~ on the prograde path suitable for corona growth ~~occur in unique tectonic circumstances likely occur~~ where deformation is largely absent (e.g., White and Clarke, 1997 – Fig. 7e), ~~at in~~ low  $a_{\text{H}_2\text{O}}$  ~~in~~ mafic rocks (Ashworth et al., 1998 – Fig. 7f; Johnson and Carlson 1990 – Fig. 2) or ~~in~~ melt-depleted pelitic ~~restites~~ rocks, or where the rate of change of pressure and temperature occurs ~~anomalously quickly~~ sufficiently fast such that diffusion rates are exceeded. Typically, the latter scenario arises in contact aureoles characterised by rapid heating and cooling (Johnson et al., 2004 – Fig. 8g; Mcfarlane et al., 2003; Ings and Owen, 2002; Barboza and Bergantz, 2000; Wheeler et al., 2004; Daczko et al., 2002; Dasgupta et al., 1997; Joesten and Fisher, 1988), but it can also occur in shock-heated rocks within large impact structures (Gibson, 2002; Ogilvie, 2010).

#### 4.5 Deformation and strain

High strain intensities have been shown experimentally to enhance equilibration (~~Holyoke and Tullis, 2006~~). (~~Delle Piane et al., 2007; Heidelbach et al., 2009; Götze et al., 2010; Keller et al., 2010; Helpa et al., 2015~~). Deformation is thought to enhance diffusion-controlled reaction rates through inducing defects which act as additional diffusion pathways, e.g. dislocations and or new subgrain boundaries (Helpa et al., 2015). Experimental work is supported by field observations. White and Clarke (1997) described coronas developed after orthopyroxene and plagioclase in a dolerite adjacent to a shear zone in the Western Musgrave Block, Australia (Fig. 7e). Towards the shear zone, coronas diminish in complexity until complete equilibration and recrystallisation is attained in the highest strain domains within the shear zone. Koons et al. (1987) documented similar findings in a quartz diorite from the Sesia Zone, Western Alps, whilst Smit et al. (2001) described enhanced replacement of garnet by, and deformation of, orthopyroxene+cordierite symplectite approaching bounding shears zones in the Limpopo Belt, South Africa. With increasing deformation, equilibrium domains progressively approach that of the bulk rock composition without any discernable change in pressure and temperature. White and Clarke (1997) attributed this enhanced equilibration in high-strain domains to a combination of reduction in grain size with attendant increase in intergranular area, accelerated intracrystalline diffusion and nucleation, and increased permeability and  $a_{\text{H}_2\text{O}}$ .

#### 5 Conditions of corona formation

In general,  $P$ - $T$  thermobarometric estimates for the average  $P$ - $T$  conditions of corona formation in mafic and pelitic granulites ~~rocks are above the wet solidus for their respective bulk rock compositions depicted in (Fig. 9). In most cases, average  $P$ - $T$  conditions exceed the wet solidus for their respective bulk rock compositions.~~ The few exceptions plotting below the solidus may be attributed to retrograde compositional resetting with cooling. Fig. 9 is consistent with corona formation ~~at~~

Formatted: Line spacing: 1,5 lines

Formatted: Line spacing: 1,5 lines

Formatted: Font: Not Bold, Italic, Font color: Auto

in granulite facies ~~temperatures in~~ rocks that have an intrinsically ~~low  $a_{H_2O}$  anhydrous~~ bulk rock composition (e.g. mafic granulites) ~~and/or~~ have undergone a degree of melt loss. Under these conditions, intergranular diffusion limits reaction rate and extent of equilibration, especially when melt is absent in coarse-grained assemblages. Retrograde corona development is likely constrained to the high-T, suprasolidus, heating portion of the  $P$ - $T$  path immediately following peak  $T$ . Since most melt is lost at or near peak conditions (White and Powell, 2002), only a fraction of melt is retained in the restitic post-peak assemblage, ~~and since~~ diffusion in melts is much more efficient than on dry grain boundaries (Zhang, 2010) element mobility diminishes markedly in the absence of a melt phase. ~~RR~~ reduced melt volumes thus, limit length-scales of diffusion during cooling to the extent that diffusion-controlled corona growth occurs. On the prograde path, the low/absent melt volumes required for ~~kinetically constrained~~ corona growth are only commonly realised in mafic igneous rocks precursors, owing to their intrinsic anhydrous bulk composition, and in dry, restitic pelitic compositions that have lost melt in an earlier metamorphic event. White and Powell (2011) distinguish two types of coronas formed either on the prograde or retrograde paths, namely, progressive or non-progressive. Progressive coronas develop on the same  $P$ - $T$  path as the assemblage that they replace, in response to a smooth change in  $P$ - $T$  conditions from those that produced the peak assemblage (e.g., Johnson et al., 2004; Hollis et al., 2006; Kelsey et al., 2003b). Non-progressive coronas develop in a separate  $P$ - $T$  event to those that generate the peak assemblage (e.g., Johnson and Carlson, 1990; Gibson, 2002; McFarlane et al., 2003).

Formatted: Font: Not Bold, Italic, Font color: Auto

## 6 Corona microstructure

Corona microstructure in prograde and retrograde coronas for which data is available is summarized in Figures 10 and 11. The average maximum corona layer thickness in mafic prograde coronas is 475  $\mu\text{m}$  (range: 70-1000  $\mu\text{m}$ ,  $n = 19$ ) and average maximum vermicule size-length is 118  $\mu\text{m}$  (range: 50-300  $\mu\text{m}$ ,  $n = 19$ ). Pelitic prograde coronas are characterized by an average maximum corona thickness of 496  $\mu\text{m}$  (range: 75-1500  $\mu\text{m}$ ;  $n = 13$ ) and an average maximum vermicule size-length of 115  $\mu\text{m}$  (range: 10-300  $\mu\text{m}$ ,  $n = 13$ ). Thus, mafic and pelitic prograde coronas do not differ significantly with respect to maximum corona layer thickness and ~~vermicule size~~ vermicule length. However, pelitic prograde coronas developed in contact metamorphic aureoles appear to exhibit greater maximum corona layer thicknesses (>500  $\mu\text{m}$ ) compared to regional pelitic prograde coronas (Fig. 10a).

Formatted: Line spacing: 1,5 lines

Most retrograde coronas described in the literature occur in pelitic bulk compositions (Appendix 2; Figure 11). Pelitic retrograde coronas are characterized by an average maximum corona thickness of 571  $\mu\text{m}$  (range: 100-3000  $\mu\text{m}$ ;  $n = 28$ ) and an average maximum ~~vermicule size~~ vermicule length of 147  $\mu\text{m}$  (range: 20-500  $\mu\text{m}$ ,  $n = 28$ ). The average maximum corona layer thickness in mafic retrograde coronas is 262  $\mu\text{m}$  (range: 80-500  $\mu\text{m}$ ,  $n = 5$ ) and average maximum ~~vermicule size~~ vermicule length is 27  $\mu\text{m}$  (range: 10-40  $\mu\text{m}$ ,  $n = 5$ ). Whilst retrograde pelitic coronas do not differ significantly from prograde pelitic coronas in terms of width and ~~vermicule size~~ vermicule length, retrograde mafic coronas are distinctly narrower and show significantly reduced ~~vermicule size~~ vermicule length relative to prograde mafic coronas (Fig. 11) The latter most likely reflects greater length-scales of melt-enhanced diffusion along the prograde path. A similar relative paucity

of melt may explain the difference in corona thickness and ~~vermicule size~~vermicule length in retrograde mafic coronas compared to retrograde pelitic coronas.

## 7 Internal compositional zonation in coronas

Complex compositional zonation is commonly observed in coronas (Fig. 12). Fully equilibrated coronas, where no compositional zonation or chemical potential gradients exist, are rare. In the population of coronas studied, only 30% were fully equilibrated, of which 60% were in pelitic bulk compositions. Commonly, coronas exhibit asymmetric zonation across the band as a whole, reflecting variable length-scales of diffusion for major components during single-stage, steady-state growth (e.g., Ashworth et al., 1998 - A98; Johnson et al., 2004 - J04, Figure 12). Less commonly, radial zonation occurs within a product layer or vermicule from the band centre/vermicule core to the rim, indicative of sequential corona growth (e.g., Zulbati et al., 2007 - ZH07, Fig. 12). The maximum magnitude of zonation in  $X_{Mg}$  of orthopyroxene across a corona band in the coronas reviewed is 0.08 (Kriegsman et al., 1999 - K99; Osanai et al., 2004 - O04; Fig. 12) and 0.07 in cordierite (Baker et al., 1987 - BKS87; Fig. 12). Unfortunately, Al content in orthopyroxene is expressed as  $y(\text{Opx})$ , Al<sup>IV</sup> and Al wt% in the literature commonly without accompanying raw analyses, so that these values cannot be recomputed to a single formulation of Al in orthopyroxene to aid comparison. Maximum asymmetric zonation magnitude with respect to  $y(\text{Opx})$  is 0.08 in Hollis et al. (2006 - H06; Fig. 12); 0.13 with respect to Al<sup>IV</sup> (a.p.f.u.) (Brandt et al., 2003 - BKO03; Fig. 12) and 0.05 with respect to recalculated molecular proportion (Hisada and Miyano, (1996) - H96; Fig. 12). Maximum magnitude of zonation in garnet is 0.22 for  $X_{Grs}$  (White and Clarke, 1997 - WC97; Fig. 12), 0.18 for  $X_{Alm}$  (Indares, 1993 - I93; Fig. 12) and 0.17 for  $X_{Prp}$  (Koons et al., 1987 - K87; Fig. 12). Maximum magnitude in plagioclase zonation ( $\Delta X_{An}$ ) is 0.42 (Baldwin et al., 2004 - B04; Fig. 12).

~~Product phase zonation makes the application of quantitative thermobarometry exceptionally difficult. Asymmetric compositional zonation is consistent with steady-state, diffusion-controlled layer growth and, in this case, local equilibria between mineral pairs in corona layers do not reflect discrete  $P-T$  conditions but, rather, compositional partitioning of the corona domain during steady-state growth at constant  $P$  and  $T$ . Symmetric, radial zoning of phases with respect to grain boundaries is more consistent with a sequential corona formation model, where initially corona layers may develop by steady-state diffusion at  $(P_1, T_1)$ , equilibrate given sufficient time and then, with subsequent change in  $P$  and  $T$ , partially re-equilibrate under new  $P-T$  conditions  $(P_2, T_2)$  that are reflected in the rim compositions (e.g., White and Clarke, 1997).~~

In some instances, corona product phases in local equilibrium adjacent to a reactant possess low enough variance to apply a conventional thermobarometer. For example, Baldwin et al. (2004) obtained  $P-T$  conditions of corona formation from Grt-Opx-Pl-Qtz equilibria using garnet rim and orthopyroxene-plagioclase symplectite compositions in direct contact. Some authors have applied conventional thermobarometers to spatially segregated phases in a corona that are not in direct contact

Formatted: Line spacing: 1,5 lines

(e.g., Perchuk et al., 2002; Brandt et al., 2003). This approach is only valid if there is no variation in phase composition across the corona band and chemical potentials gradients do not exist.

Ashworth et al. (1998) derived a non-equilibrium extension to conventional thermobarometry based on open-system, steady-state diffusion modelling of coronas that has been successfully employed to estimate  $P$ - $T$  conditions of formation of asymmetrically-zoned coronas (Ashworth et al., 2001). Unfortunately, non-equilibrium thermobarometry, like conventional thermobarometry, is very sensitive to uncertainties in compositional data and prone to underestimating peak temperatures of formation, because of retrograde resetting upon cooling. The preferred thermobarometric technique for coronas entails phase equilibria modelling in THERMOCALC (e.g., Baldwin et al., 2015); where modes and phase compositions are used to jointly constrain a field of equilibration in  $P$ - $T$ - $X$  space. THERMOCALC allows the modelling of corona textures in chemical potential space (White et al., 2008; White and Powell, 2011; Štípská et al., 2010 and Baldwin et al., 2015) facilitating direct comparison of the observed phase zonation and spatial array of layers across a corona in which chemical potential gradients prevail with predicted compositions at a range of temperatures and pressures.

## 8 Modelling of coronas

Diffusion modeling of metamorphic reactions began in earnest with the foundational work of Thompson (1959) and Korzhinskii (1959), who demonstrated that infinitesimally small regions of rock can attain local equilibrium in the presence of chemical potential gradients for all or some components. This meant that even if the system is in disequilibrium as a whole, with gradients in chemical potentials of components in the intergranular medium, it is nevertheless possible to relate the mineral assemblage at any point to the chemical potentials at that point. Korzhinskii (1959) devised a graphical method for plotting a saturation surface in chemical potential space that allowed determination of relative chemical potential differences across a series of layers (Figure 1). This method facilitated an understanding of how layer sequences would evolve as components diffuse down chemical potential gradients. The limitation of Korzhinskii's technique is that many diffusion paths from one reactant to another are possible in the chemical potential diagram, such that more than one possible layer sequence could evolve for a particular  $P$ - $T$  condition (Nishiyama, 1983). The advances in thermodynamic formulations of phases required to model these relationships would only be developed by workers in later decades (Powell & Holland, 1988; Powell & Holland, 1990; Holland & Powell, 1998; Powell et al., 1998; Holland & Powell, 2003; Powell et al., 2005; Holland & Powell 2011; ~~White et al., 2014~~), and even then only readily applied to coronas using the appropriate activity-composition relationships through pioneering studies by White et al. (2008); Štípská et al. (2010) and Baldwin et al. (2015). In the interim, workers modelled coronas through a quantitative physico-chemical modelling approach, in which component fluxes and chemical potential gradients required to reproduce observed corona layers configurations were derived assuming reaction was driven and governed by minimisation of ~~entropy~~ Gibbs Free Energy.

Formatted: Line spacing: 1,5 lines

## 8.1 Quantitative physical modelling of coronas

The quantitative physical modelling of coronas is premised on the fact that, in layered reaction products, mineral layers grow by reaction at their contacts and the stoichiometries of the layer contact reactions are determined by the relative diffusion fluxes of components within the layer. Component fluxes and chemical potential differences across each layer attain steady-state values as a function of the rate of production and consumption of phases in the layer (Fisher, 1975; [Dohmen and Chakraborty, 2003](#)). Joesten (1977) combined the approaches of Fisher (1975) and Korzhinskii (1959) into a hybrid methodology that allowed the prediction of a unique sequence of mineral layers produced by steady-state diffusion for a given choice of phenomenological coefficients in an isochemical system. Joesten's model is based on three fundamental assumptions: first, diffusing components are in local equilibrium with contiguous minerals at every point in a corona, despite the fact that the corona as a whole is in disequilibrium; second, component fluxes and chemical potential gradients remain constant at each point in the corona in a steady-state throughout its evolution; and third, all components are considered to be conserved within the reaction band, i.e., there is no communication with a system beyond the boundaries of the reaction bands (the system is closed).

Joesten's model required the simultaneous solution of [the three sets of equations independently defined previously \(equations 3.4 and 5\) independently](#) relating component fluxes to chemical potential gradients in a layer, chemical potential gradients to each other in the presence of a mineral with a particular composition, and the flux change between layers to reaction coefficients at layer boundaries ([e.g., Ashworth and Sheplev, 1997](#)). It is possible to evaluate the stability of a multilayer reaction band for a postulated set of intergranular diffusion coefficients if the compositions of the phases in each band are known. The model predicts the relative widths of layers in the reaction band, modal proportions of phases within each layer, component fluxes across layers and reaction stoichiometry at layer boundaries.

Early attempts to model corona textures using Joesten's formalism focussed on corona reaction bands formed between olivine and plagioclase in metagabbros (e.g., Nishiyama, 1983; Joesten, 1986; Grant, 1988). This early work was hindered by the closed system constraint in Joesten's model. For example, Grant (1988) was unable to produce enough Ca from the observed reactant plagioclase to accommodate all the Ca in the corona reaction band. Furthermore, the failure of Joesten's model to account for hydrous corona products, such as hornblende, from anhydrous plagioclase and olivine reactants, led workers to embrace an open-system, metasomatic, modification to Joesten's model. An open-system modification was introduced by Johnson and Carlson (1990) and Ashworth and Birdi (1990). Material balance calculations allowed them to determine the external component fluxes across the outer boundaries of the corona, thereby accommodating open-system communication with the enclosing matrix. Johnson and Carlson (1990) and Carlson and Johnson (1991) introduced external boundary flux equations to model open-system behaviour. Ashworth and Birdi (1990) treated metasomatic fluxes at corona boundaries as theoretical 'phases' with 'negative' compositions where components were lost from the system and 'positive' compositions where they entered into the corona system. The open system studies of Johnson and Carlson (1990) and

Formatted: Line spacing: 1,5 lines

Carlson and Johnson (1991) ~~also indicated that corona growth may not occur as a 'single stage, steady state process', but accommodated rather through a number of 'transient states', reflecting~~ gradual changes in the composition of the reactants and external fluxes throughout corona evolution, thus manifesting as variable product assemblages. ~~(Figure 7a).~~

Open-system diffusion models for coronas had much more success in explaining corona development in a variety of different bulk compositions, from mafic rocks to metapelites, than the earlier isochemical models (Johnson and Carlson, 1990; Carlson and Johnson, 1991; Ashworth and Birdi, 1990; Ashworth et al., 1992; Ashworth, 1993; Ashworth and Sheplev, 1997; Ashworth et al., 1998). Ashworth (1993) noted that, although the overall extent of reaction was constrained by highly mobile components with large diffusive fluxes, the actual spatial arrangement of minerals in coronas appears to be strongly controlled by those components with lower diffusivities, particularly Al and Si. He noted that, in all cases, an Al-rich layer (commonly symplectitic) was located adjacent to the most aluminous reactant, grading into an Al-poor layer adjacent to the less aluminous reactant, and both separated by a 'transitional' layer of intermediate contents of Al (Figure 13).

Ashworth and Birdi (1990) compared the Al/Si ratio in aluminous reactants and the adjacent symplectite for a number of coronas using an isocon diagram (Figure 14; Grant, 1986). The isocon plot suggested that total Al and Si (strictly  $AlO_{3/2}$  and  $SiO_2$ , since the components used are oxides following Fisher, 1973) included within the phases in the symplectite appear to be 'inherited stoichiometrically' from the adjacent reactant. Any mismatch between Al/Si ratio of the reactant and individual phases comprising the symplectite is accommodated by proportional growth of symplectite phases in the appropriate ratio such that cumulatively the Al/Si ratio is retained. Ashworth and Birdi (1990) proposed that this was a consequence of low diffusivities of Al and Si relative to, ~~inter alia,~~ Fe, Mg and Ca. According to them, any ~~disagreement~~ mismatch between the Al/Si ratio of the symplectite and reactant implies open-system behaviour for these components. ~~The~~ Thus, the endmember scenario involving near-complete open-system behaviour for Al and Si would, ~~thus,~~ be a monomineralic reaction band in which mismatch in Al/Si ratio is greatest. Mongkoltip and Ashworth (1983) ventured still further that the occurrence of two immobile ~~diffusing~~ components is a necessary condition for symplectite formation. This assertion agreed with the metasomatic equilibrium theory of Korzhinskii (1965), which states that any divariant equilibrium assemblage of  $n$  phases contains at least  $n$  inert or immobile components. Assessing open- or closed-system behaviour for Al and Si is critical in deciding which assumptions are realistic when determining the overall reaction. If Al and Si are preserved in the symplectite, then closure to Al and Si can be used to constrain the system of simultaneous equations defining the overall reaction, such that it is not underdetermined. If this assumption is not valid, constant volume may have to be assumed (Carlson and Johnson, 1991).

The first thermodynamic treatment of conservation of volume during diffusion metasomatism was undertaken by Carmichael (1987). Carmichael challenged the assumption that pressure remains constant during irreversible diffusion metasomatism. During reaction, there is a tendency for the boundary between two juxtaposed reactants to be displaced perpendicular to the



interface between the reactants at a magnitude corresponding to the change of volume of solid phases of the reaction. If there is any mechanical resistance to this displacement, constant volume replacement is approached. Carmichael (1987) was able to model a field of nonhydrostatic stress induced by migration of the boundary between reactants. The stress field is oriented in a manner which opposes the displacement and strain accompanying the migration of the boundary. The stress field may be dissipated by either rock deformation or secondary mass transfer out of the reacting volume. According to Carmichael's model, the secondary mass transfer may be so efficient as to eliminate the induced stress caused by boundary migration, such that the original interface between reactants remains undisplaced. This realisation allows reasonable approximations to be made for the original boundary between reactants (and the relative proportions of reactants involved in reaction) such that an overall reaction may be derived.

In this context, the spacing of lamellae or vermicules in symplectites reflects a balance between diffusive energy dissipation and grain boundary energy. Ashworth and Chambers (2000) derived a theory quantifying this relationship employing both non-equilibrium thermodynamics and the principle of maximum rate of energy dissipation. Accordingly, the spacing of lamellae in a symplectite for a particular reaction is a function of the reaction rate (i.e., reaction front velocity), diffusion coefficient of the slowest-diffusing components and the width of the reaction front:

15

$$\lambda = \sqrt[3]{\frac{L\delta}{v}} \quad (8)$$

$\lambda$  = lamellae spacing;  $L$  = Onsager diffusion coefficient

$\delta$  = reaction front width;  $v$  = reaction rate

The finest symplectitic intergrowths (closest lamellae spacing) are predicted to occur when reaction rates greatly exceed diffusion coefficients for the slowest-diffusing species for a particular reaction front width.

Despite advances in diffusion metasomatic modelling of coronas in the early 1990's, success was still limited in that commonly more than one stable layer sequence was computable for the same inputs. Sheplev et al. (1991, 1992a, b) presented a criterion to determine which non-unique solution is more thermodynamically stable compared to others, ~~and is, thus, the correct solution.~~ The criterion was formalized by Ashworth and Sheplev (1997), and extended so as to obtain a measure of the affinity of reaction or, rather, departure from equilibrium, preserved in the corona. A final refinement to the open-system diffusion model for coronas was derived by Ashworth et al. (2001), in which ratios of the affinity of independent endmember reactions modelled for a corona are compared to ratios calculated from an internally-consistent thermodynamic database (Holland and Powell, 1998). The pressure and temperature where the ratio of model endmember reaction affinities and real endmember reaction affinities approach the same value is considered to represent the closure

pressure and temperature below which the corona remained inert to reaction. This allowed quantitative estimates of pressure and temperature of formation of minerals in disequilibrium to be made.

## 8.2 Calculated phase equilibria modelling

A limitation of the quantitative physical modelling of coronas outlined above is that solid solutions and the gradational shifts in phase composition within a band cannot practically be accounted for in the modelling (White and Powell, 2011; Baldwin et al. 2015). In the last decade, advances in phase equilibria modelling have allowed geologically realistic corona compositional systems to be modelled in  $P$ - $T$ - $X$  (Johnson et al., 2004) and chemical potential space (White et al., 2008; Štípská et al., 2010; White & Powell, 2011; Baldwin et al., 2015). It is possible to predictively model corona evolution with changing effective bulk composition through progressive metasomatic exchange of components with the external matrix in a rock and/or partitioning of the corona effective bulk composition with reduced length-scales of component diffusion on cooling (e.g., Johnson et al., 2004; White et al., 2008; Štípská et al., 2010; Baldwin et al., 2015). For completeness and clarity, all component chemical potentials referred to in this section apply to those within the phases in the local equilibria under consideration.

One of the most robust and elegant applications of chemical potentials in constraining corona textural and compositional evolution in  $P$ - $T$ - $X$  space is that undertaken by Štípská et al (2010). These workers modelled coronas developed after kyanite in a quartzofeldspathic gneiss from the Bohemian Massif (Figure 8h). Phase equilibria modelling entailed an initial estimate of overall  $P$  and  $T$  conditions prevailing using a conventional  $P$ - $T$  pseudosection in NCKFMASHTO (Štípská et al., 2010). For the purpose of phase equilibria modelling in chemical potential space, it is necessary to reduce the number of components treated, based on assumptions considering their inferred relative mobility. Štípská et al., (2010) ranked components in the corona according to a hierarchy of mobility or relative diffusivities, i.e., in which slowest diffusing components are considered effectively immobile (i.e., chemical potential gradients are static and cannot change during reaction); other components are considered mobile (their chemical potential gradients vary on the scale of the corona); and some components are treated as completely mobile (their chemical potentials do not vary across the corona and are superimposed by the matrix). Accordingly, Štípská et al. (2010) were able to reduce the model compositional system to NCKFMAS.

Prior to their consideration of the ferromagnesian minerals in the corona, Štípská et al. (2010) modelled the monomineralic plagioclase moat in NCKAS, with the further assumption that  $K_2O$  is completely mobile and  $Al_2O_3$  is immobile with static potentials, i.e., it is treated as an extensive variable, in terms of phase composition. The chemical potentials for the matrix edge of the corona correspond to those for the equilibrated peak assemblage and the corona plagioclase composition in local equilibrium with matrix (i.e.,  $An_{20}$ ) (Fig. 15a). The chemical potentials for the metastable kyanite corona contact were derived by modifying  $\mu(Na_2O)$  at the matrix contact until the kyanite-plagioclase boundary with  $An_{45}$  appears on the phase

Formatted: Line spacing: 1,5 lines

diagram (Fig. 15a). In Fig. 15a, the chemical potential relations at the kyanite-~~and~~-matrix boundary are overlain in  $\mu(\text{CaO})$ - $\mu(\text{SiO}_2)$  space and local equilibrium potentials indicated. Since the values of  $\mu(\text{Na}_2\text{O})$ ,  $\mu(\text{CaO})$  and  $\mu(\text{SiO}_2)$  differ between the two equilibria, a chemical potential gradient is established and is represented by the vector in Fig. 15a. For equilibrium to be attained throughout the corona, chemical potentials must be equalised everywhere by diffusion. If ~~diffusion is kinetically~~  
5 ~~element transport is~~ constrained, these chemical potential gradients persist as stranded gradients ~~in chemical potential~~ (Baldwin et al., 2015).

Stipska et al. (2010) modelled the presence or absence of a garnet layer in the corona by superimposing  $\mu(\text{FeO})$  and  $\mu(\text{MgO})$  variations on the vector in  $\mu(\text{Na}_2\text{O})$ - $\mu(\text{CaO})$ - $\mu(\text{SiO}_2)$  space obtained in Fig. 15b. The authors calculated  $\mu(\text{FeO})$ -  $\mu(\text{MgO})$   
10 diagrams for the matrix boundary, kyanite boundary and midway between ~~the~~-them with respective  $\mu(\text{Na}_2\text{O})$ - $\mu(\text{CaO})$ - $\mu(\text{SiO}_2)$  dictated by the vector constrained in NCKAS space (Figure 15a). The observed composition of garnet ( $X_{\text{Fe}} = 0.70$ ), defines a corresponding vector in  $\mu(\text{FeO})$  and  $\mu(\text{MgO})$  space (Figure 15b). Stipska et al. (2010) manually constructed a phase diagram by combining the phase relations along the  $X_{\text{Fe}} = 0.70$  vector in  $\mu(\text{FeO})$ -~~and~~- $\mu(\text{MgO})$  space with those corresponding in  $\mu(\text{Na}_2\text{O})$ - $\mu(\text{CaO})$ - $\mu(\text{SiO}_2)$  space (Fig. 15c). Two observed chemical potential paths were proposed to  
15 account for garnet-present and garnet-absent coronas that reproduced the known spatial array and composition of phases. They suggest that the chemical potential path required to produce garnet requires the  $\mu(\text{FeO})$  and  $\mu(\text{MgO})$  potentials to be boosted relative to those in local equilibrium with the matrix. This is consistent with the spatial association of original matrix garnet in the corona, such that the  $\mu(\text{FeO})$  and  $\mu(\text{MgO})$  potentials are locally augmented, thereby stabilising a garnet layer in the coronas in the local equilibrium with kyanite (Štípská et al., 2010).

Modelling of the development of the plagioclase-spinel symplectite required that  $\text{SiO}_2$  also be treated as immobile (Štípská et al., 2010). Constrained  $\text{SiO}_2$  diffusion from the matrix toward kyanite across the plagioclase moat induced a silica-deficient  
20 effective local bulk composition at the plagioclase-kyanite boundary, thus, lowering the local  $\text{SiO}_2$  chemical potential sufficiently to stabilise spinel (assuming corundum was unable to nucleate). As a consequence, both  $\text{SiO}_2$  and  $\text{Al}_2\text{O}_3$  chemical potentials are treated as quasi-stationary, i.e., they are modelled as the coupled extensive composition variables. As  
25 a consequence, phase fields in  ~~$\mu$ - $\mu$~~  space are labelled with  $\text{Al}_2\text{O}_3$ - $\text{SiO}_2$  bar compatibility diagrams. Štípská et al. (2010) proceeded to model the requisite chemical potentials for the symplectite stability initially in  $\mu(\text{Na}_2\text{O})$ - $\mu(\text{CaO})$ - $\mu(\text{SiO}_2)$  space. They derived a vector in chemical potential space between the symplectite contact with the plagioclase moat and the  
kyanite boundary (Figure 15d) that accounted for the plagioclase composition within the symplectite. However, the restricted stability limits of spinel in  ~~$\mu$ - $\mu$~~  space at the modelled conditions of post-peak conditions led Štípská et al. (2010) to infer the spinel-bearing symplectites must have formed during subsequent decompression after plagioclase moat  
30 formation, as the spinel stability field is far broader at lower pressures for the same potentials.

Similarly, Baldwin et al. (2015) modelled spinel-plagioclase, sapphirine-plagioclase and corundum-plagioclase symplectites after kyanite in a quartzofeldspathic granulite gneiss from the Athabasca granulite terrane, Snowbird tectonic zone, Canada.

These workers, like Štípská et al. (2010), deduced that the spinel-plagioclase symplectites must be metastable with respect to the corundum-bearing alternative. Assuming corundum was unable to nucleate, they were able to account for spatial relationships and compositions observed in the symplectites over a wide range of *P-T* conditions and plagioclase compositions. Crucially they were able to deduce that, without the application of chemical potential phase diagrams suggesting otherwise, such reaction textures may occur over a wide range of *P-T* conditions and extreme caution must be exercised in inferring *P-T* conditions of retrograde metamorphism from them.

Formatted: Font: Not Bold, Italic, Font color: Auto

Formatted: Font: Not Bold, Italic, Font color: Auto

Formatted: Font: Not Bold, Italic, Font color: Auto

Štípská et al. (2010) and Baldwin et al. (2015) conclusively demonstrate that the use of chemical potentials is imperative and unavoidable when investigating coronas. Previous workers (Johnson et al., 2004; Tajčmanová et al., 2007; Ogilvie, 2010) have attempted to model corona textures without the chemical potential phase diagrams. These authors invoked an equilibrium volume comprising the corona, with or without a matrix contribution, which they assumed to be effectively closed system during textural development. Accordingly, corona growth involved a redistribution of chemical components within the limits of the equilibrium volume. -This approach might account for some of the phases within the corona, but fails to account for the non-linear exchange of components both within local equilibria across the corona but also external metasomatic exchange with the enclosing matrix during corona evolution. Tajčmanová et al (2007) tried to circumvent this problem by constructing a *T-X* section to model the compositional partitioning, owing to variable diffusion of components, across the corona, and predicted phases. Similarly, Ogilvie (2010) attempted to model shifts in corona phase compositions and modes through the inferred exchange of components between the corona effective bulk compositions and the external matrix through a *T-X* section involving pure reactants on one axis and pure matrix as the other axis. The fundamental problem with both these approaches, as noted by White & Powell (2011), is that at best, it is only possible to account for observed assemblages in a qualitative generalised sense. This is because the high variance of the phase fields from the *T-X* section or *P-T* pseudosection predicts stable phases should be present in the coronas that are not actually observed. This can only be treated by considering some components as mobile, and removing them from the bulk composition utilised to model the corona. Crucially, the manner in which the chemical potentials evolve through *P-T* space involves non-linear changes in chemical potentials and local effective bulk compositions. Since *P-T* pseudosections are constrained at a static bulk composition and a *T-X* section can only model linear changes in bulk composition, by their nature they are not flexible enough to allow modelling of the intricacies of corona development either owing to variable external component flux into the corona (for example, by melt ingress or loss) or variable multi-component length-scales of diffusion.

## 9 Discussion/Concluding Remarks

Formatted: Line spacing: 1,5 lines

Evidence of partial equilibrium, preserved in coronas, allows us to examine fundamental processes governing reaction mechanism, rates and extents of equilibration in metamorphic (and, more rarely, igneous) rocks. Mechanisms of corona formation have been reviewed, i.e., *continuous*, single-stage, steady-state, diffusion-controlled vs. *non-continuous*, sequential development. Determining which model of corona formation is most applicable in the any corona study (and/or relative

contribution of each end-member model to the overall reaction mechanism) is critical, since both models have limitations in the information that may be gleaned from them in petrogenetic studies.

A comprehensive review of prograde and retrograde coronas for mafic and pelitic bulk rock compositions from both regional and contact aureole terranes reveals that major controls on corona mineralogy include  $P$ ,  $T$  and  $a_{\text{H}_2\text{O}}$  during formation, mechanism of formation, reactant bulk compositions and extent of metasomatic exchange with the surrounding rock, relative diffusion rates for major components, and associated deformation and strain. In general, corona formation occurs under granulite facies conditions, in low  $a_{\text{H}_2\text{O}}$  and/or anhydrous/restitite, melt-depleted, bulk rock compositions (Fig. 9). With respect to corona microstructure, prograde coronas in pelitic rocks developed in contact metamorphic aureoles exhibit greater maximum corona thickness than those in regional coronas (Figure 11a). Mafic and pelitic prograde coronas do not differ significantly with respect to maximum corona layer thickness and vermicule size/vermicule length, however, corona thickness and maximum vermicule size/vermicule length in retrograde mafic coronas are significantly smaller than both retrograde pelitic coronas and prograde mafic coronas, which likely attests to the role of melt in enhancing length-scales of diffusion during corona formation (retrograde mafic rocks are more likely to be melt-poor and anhydrous). Increased maximum layer thickness and vermicule size/vermicule length in prograde mafic coronas compared to retrograde mafic coronas (Fig. 11) may reflect greater length-scales of diffusion in potentially more melt-rich bulk compositions with protracted reaction along the prograde path. Prograde pelitic coronas do not differ significantly from retrograde pelitic coronas with respect to microstructure (Fig. 11), owing to the intrinsically more hydrous pelitic bulk compositions and capacity to generate diffusion-enhancing melt during decompression.

High-variance local equilibria in a corona and disequilibrium across the corona as a whole preclude the application of conventional thermobarometry when determining  $P$ - $T$  conditions of corona formation. Although tempting, the asymmetric zonation in phase composition across a corona, indicative of single-stage, steady-state, diffusion controlled formation, should not be interpreted as a record of discrete  $P$ - $T$  conditions during successive layer growth along the  $P$ - $T$  path. Rather, the local equilibria between mineral pairs in corona layers reflect compositional partitioning of the corona domain during steady-state growth at constant  $P$  and  $T$ . A non-equilibrium extension of conventional thermobarometry derived by Ashworth et al. (2001) should be used with phase equilibria modelling in THERMOCALC to constrain  $P$ - $T$  evolution of coronas (e.g., Ogilvie 2010).

Through the application of equilibrium thermodynamics at an appropriate scale (i.e., that of local equilibrium – Korzhinski, 1959; Thompson 1959), corona evolution can be modelled either through quantitative physico-chemical diffusion modelling (Johnson and Carlson, 1990; Carlson and Johnson, 1991; Ashworth and Birdi, 1990; Ashworth et al., 1992; Ashworth, 1993; Ashworth and Sheplev, 1997; Ashworth et al., 1998) or calculated phase equilibria involving chemical potentials (White et al., 2008; Štípská et al., 2010; White & Powell, 2011; Baldwin et al., 2015). While the former allows quantification of reaction affinity and chemical potential gradients across coronas bands, it is unable to practically accommodate variation in

phase composition within a band. Moreover, it assumes that corona layer configuration formed during one, continuous, single-stage, diffusion-controlled process, i.e., component flux between local equilibria across all bands in the corona was controlled by chemical potential gradients at that scale. In contrast, forward modelling utilising calculated chemical potential gradients to account for corona phase compositions and layer array- assumes nothing about the sequence in which the layers form and, since chemical potential gradients prevailing are constrained by observed phase compositional variation within a layer, it allows far more nuanced yet robust understanding of corona evolution and the implications for the path followed by a rock in *P-T-X* space. When combined with evolving physical diffusion models predicated on the experimental investigation of diffusion and nucleation in higher variance systems (e.g., Abart et al, 2014; Jonas et al., 2015; Mueller et al.,2015), temporal resolution will be afforded to phase equilibria models, seamlessly integrating corona evolution in P-T-X space with time.

## 10 Acknowledgments

Funding from the National Research Foundation Scarce Skills Scholarship and Rated Researcher Programmes is gratefully acknowledged. Tim Johnson and Thomas Mueller are thanked for insightful reviews.

## References

Abart, R., Schum, R., Harlov, D.E.: Metasomatic coronas around hornblendite xenoliths in granulite facies marble, Ivrea zone, N Italy, I: Constraints on component mobility, *Contributions to Mineralogy and Petrology*, 141, 473-493, 2001.

Abart, R., Kunze, K., Milke, R., Sperb, R., Heinrich, W.: Silicon and oxygen self-diffusion in enstatite polycrystals: the Milke et al. (2001) rim growth experiments revisited, *Contributions to Mineralogy and Petrology*, 147, 633–646,2004.

Abart, R., Petrishcheva, E.: Thermodynamic model for reaction rim growth: Interface reaction and diffusion control *American Journal of Science*, 311, 517–527, 2011.

Abart, R., and Petrishcheva, E., Joachim, B.: Thermodynamic model for growth of reaction rims with lamellar microstructure, 97, 231–240, 2012.

Abart R., Svoboda J., Jerabek P., Karadeniz E. P., Habler G.: Interlayer growth kinetics of a binary solid-solution based on the thermodynamic extremal principle: application to the formation of spinel at periclase-corundum contacts, *American Journal of Science*, 316, 309–328, 2016.

Ague J.J., Baxter, E.F.: Brief thermal pulses during mountain building recorded by Sr diffusion in apatite and multicomponent diffusion in garnet, *Earth and Planetary Science Letters*, 261, 500-516, 2007.

Formatted: Line spacing: 1,5 lines

Formatted: Line spacing: 1,5 lines

- Álvarez-Valero, A. M., Cesare, B., Kriegsman, L.M.: Formation of spinel-cordierite-feldspar-glass coronas after garnet in metapelitic xenoliths: reaction modelling and geodynamic implications, *Journal of Metamorphic Geology*, 25, 305-320, 2007.
- 5 Ashworth, J. R.: The role of magmatic reaction, diffusion, and annealing in the evolution of coronitic microstructure in troctolitic gabbro from Risør, Norway: a discussion, *Mineralogical Magazine*, 50, 469-473, 1986.
- Ashworth, J. R.: Fluid-absent diffusion kinetics of Al inferred from retrograde metamorphic coronas, *American Mineralogist*, 78, 331-337, 1993.
- Ashworth, J. R., Birdi, J. J.: Diffusion modelling of coronae around olivine in an open system, *Geochimica et Cosmochimica Acta*, 54, 2389-2401, 1990.
- 10 Ashworth, J. R., Birdi, J. J., Emmett T. F.: A complex corona between olivine and plagioclase from the Jotun Nappe, Norway, and the diffusion modelling of multimineralic layers, *Mineralogical Magazine*, 56, 511-525, 1992.
- Ashworth, J. R., Chambers, A. D.: Symplectic reaction in olivine and the controls of intergrowth spacing in symplectites, *Journal of Petrology*, 41, 285-304, 2000.
- 15 Ashworth, J. R., Sheplev, V. S.: Diffusion modelling of metamorphic layered coronas with stability criterion and consideration of affinity, *Geochimica et Cosmochimica Acta*, 61, 3671-3689, 1997.
- Ashworth, J. R., Sheplev, V. S., Bryxina, N. A., Kolobov, V. Y., Reverdetto, V. V.: Diffusion-controlled corona reaction and over-stepping of equilibrium in a garnet granulite, Yenisey Ridge, Siberia, *Journal of Metamorphic Geology*, 16, 231-246, 1998.
- 20 Ashworth, J. R., Sheplev, V. S., Khlestov, V. V., Ananyev, A. A.: Geothermometry using minerals at non-equilibrium: a corona example European, *Journal of Mineralogy*, 13, 1153-1161, 2001.
- Baker, J., Powell, R., Sandiford, M., Muhling, J.: Corona textures between kyanite, garnet and gedrite in gneisses from Errabiddy, Western Australia, *Journal of Metamorphic Geology*, 5, 357-370, 1987.
- Baldwin, J. A., Bowring, S. A., Williams, M. L., Williams, I. S.: Eclogites of the Snowbird tectonic zone: petrological and U-Pb geochronological evidence for Paleoproterozoic high-pressure metamorphism in the western Canadian Shield, *Contributions to Mineralogy and Petrology*, 147, 528-548, 2004.
- 25

- Baldwin, J. A., Powell, R., White, R. W., Štípská, P.: Using calculated chemical potential relationships to account for replacement of kyanite by symplectite in high pressure granulites, *Journal of Metamorphic Geology*, 33, 311-330, 2015.
- Barboza, S. A., Bergantz, G. W.: Metamorphism and Anatexis in the Mafic Complex Contact Aureole, Ivrea Zone, Northern Italy, *Journal of Petrology*, 41, 1307-1327, 2000.
- 5 Brady, J. B.: Metasomatic zones in metamorphic rocks, *Geochimica et Cosmochimica Acta*, 41, 113-125, 1977.
- Brady, J. B.: Intergranular diffusion in metamorphic rocks, *American Journal of Science*, 283A, 181-200, 1983.
- Brandt, S., Klemd, R., Okrusch, M.: Ultrahigh-Temperature Metamorphism and Multistage Evolution of Garnet-Orthopyroxene Granulites from the Proterozoic Epupa Complex, NW Namibia, *Journal of Petrology*, 44, 1121-1144, 2003.
- Bruno, M., Compagnoni, R., Rubbo, M.: The ultra-high pressure coronitic and pseudomorphous reactions in a metagranodiorite from the Brossasco-Isasca Unit, Dora-Maira Massif, western Italian Alps: a petrographic study and equilibrium thermodynamic modelling, *Journal of Metamorphic Geology*, 19, 33-43, 2001.
- 10 Carlson, W. D.: Scales of disequilibrium and rates of equilibration during metamorphism, *American Mineralogist*, 87, 185-204, 2002.
- Carlson, W. D., Johnson, C.D.: Coronal reaction textures in garnet amphibolites of the Llano Uplift, *American Mineralogist*,  
15 76, 756-772, 1991.
- Carmichael, D. M.: Induced stress and secondary mass transfer: thermodynamic basis for the tendency toward constant-volume constraint in diffusion metasomatism, in: *Chemical Transport in Metasomatic Processes*, C 218, NATO Adv. Study Inst., Ser., 239-264, 1987.
- 20 Clarke, G. L., Powell, R., Guiraud, M.: Low-pressure granulite facies metapelitic assemblages and corona textures from MacRobertson Land, east Antarctica: the importance of Fe<sub>2</sub>O<sub>3</sub> and TiO<sub>2</sub> in accounting for spinel-bearing assemblages. *Journal of Metamorphic Geology*, 7, 323-335, 1989.
- Daczko, N. R., Stevenson, J. A., Clarke, G. L., Klepeš, K. A.: Successive hydration and dehydration of high-P mafic granofels involving clinopyroxene-kyanite symplectites, Mt Daniel, Fiordland, New Zealand, *Journal of Metamorphic Geology*, 20, 669-682, 2002.
- 25 Dasgupta, S., Ehl, J., Raith, M. M., Sengupta, P., Sengupta, P.: Mid-crustal contact metamorphism around the Chimakurthy mafic-ultramafic complex, Eastern Ghats Belt, India, *Contributions to Mineralogy and Petrology*, 129, 182-197, 1997.

**Formatted:** Font: Not Bold, Font color: Auto, Subscript

**Formatted:** Font: Not Bold, Font color: Auto, Subscript

**Formatted:** Font: Not Bold, Font color: Auto, Subscript



- [Delle Piane, C., Burlini, L., Grobety, B.: Reaction-induced strain localization: torsion experiments on dolomite. \*Earth and Planetary Science Letters\*, 256, 36–46, 2007.](#)
- [Dohmen R, Chakraborty S.: Mechanism and kinetics of element and isotopic exchange mediated by a fluid phase. \*American Mineralogist\*, 88, 1251-1270, 2003](#)
- 5 Droop, G. T. R.: Reaction history of garnet-sapphirine granulites and conditions of Archaean high-pressure granulite-facies metamorphism in the Central Limpopo Mobile Belt, Zimbabwe, *Journal of Metamorphic Geology*, 7, 383-403, 1989.
- Ellis, D. J.: Osumilite-sapphirine-quartz granulites from Enderby Land, Antarctica: P-T conditions of metamorphism, implications for garnet-cordierite equilibria and the evolution of the deep crust, *Contributions to Mineralogy and Petrology*, 74, 201-210, 1980.
- 10 [Farver, J., Yund, R.: Volume and grain boundary diffusion of calcium in natural and hot-pressed calcite aggregates. \*Contributions to Mineralogy and Petrology\*, 123, 77–91, 1996.](#)
- Fisher, G. W.: Non-equilibrium thermodynamics as a model for diffusion-controlled metamorphic processes, *American Journal of Science*, 273, 897-924, 1973.
- Fisher, G. W.: The thermodynamics of diffusion-controlled metamorphic processes, in: *Mass Transport Phenomena in*
- 15 *Ceramics*, Plenum Press, New York, 111-122, 1975.
- Fisher, G. W.: Nonequilibrium thermodynamics in metamorphism, in: *Thermodynamics in Geology*, D. Reidel, 381-403 , 1977.
- [Fisher, G. W., Lasaga, A. C.: Kinetics of Geochemical Processes, \*Reviews in Mineralogy\* 8, \*Mineral. Soc. Am.\*, 171-85, 1981.](#)
- 20 [Fisher G. W.: The application of ionic equilibria to metamorphic differentiation: an example. \*Contributions to Mineralogy and Petrology\*, 29, 91-103, 1970.](#)
- [Fisler, D. K., Mackwell, S. J., Petsch, S.: Grain boundary diffusion in enstatite. \*Physics and Chemistry of Minerals\*, 24, 264–273, 1997.](#)
- 25 [Foster, C. T.: A thermodynamic model of mineral segregations in the lower sillimanite zone near Rangeley, Maine. \*American Mineralogist\*, 66, 260-277, 1981.](#)

Foster, C. T.: Thermodynamic models of reactions involving garnet in a sillimanite/staurolite schist, Mineralogical Magazine, 50, 427-439, 1986.

Gardés, E., Wunder, B., Wirth, R., Heinrich, W.: Growth of multilayered polycrystalline reaction rims in the MgO-SiO<sub>2</sub> system, part I: experiments. Contributions to Mineralogy and Petrology, 161, 1-12, 2011a.

**Formatted:** Font: Not Bold, Font color: Auto, Subscript

Gardés, E., Heinrich W.: Growth of multilayered polycrystalline reaction rims in the MgO-SiO<sub>2</sub> system, part II: modelling. Contributions to Mineralogy and Petrology, 162, 37-49, 2011.

**Formatted:** Font: Not Bold, Font color: Auto, Subscript

Gibson, R. L.: Impact-induced melting in Archaean granulites in the Vredefort Dome, South Africa I: Anatexis of metapelitic granulites, Journal of Metamorphic Geology, 20, 57-70, 2002.

Götze, L.C., Abart, R., Rybacki, E., Keller, L.M., Petrishcheva, E., Dresen, G.: Reaction rim growth in the system MgO-Al<sub>2</sub>O<sub>3</sub>-SiO<sub>2</sub> under uniaxial stress. Mineralogy and Petrology 99, 263-277, 2010.

**Formatted:** Font: Not Bold, Font color: Auto, Subscript

Grant, S. M.: Diffusion models for corona formation in metagabbros from the western Grenville Province, Canada, Contributions to Mineralogy and Petrology, 98, 49-63, 1988.

**Formatted:** Font: Not Bold, Font color: Auto, Subscript

**Formatted:** Font: Not Bold, Font color: Auto, Subscript

Grew, E. S.: Sapphirine+quartz association from Archaean rocks in Enderby Land, Antarctica, American Mineralogist, 65, 821-836, 1980.

Griffin, W. L.: Formation of eclogites and coronas in anorthosites, Bergen Arcs, Norway, Geological Society of America, Memoir, 135, 37-63, 1972.

Griffin, W. L., Heier, K. S.: Petrological implications of some corona structures, Lithos, 6, 315-335, 1973.

Harley, S. L.: The origins of granulites: a metamorphic perspective, Geological Magazine, 126, 215-247, 1989.

Heidelbach, F., Terry, M.P., Bystricky, M., Holzapfel, C., McCammon, C.: A simultaneous deformation and diffusion experiment: quantifying the role of deformation in enhancing metamorphic reactions. Earth and Planetary Science Letters, 278, 386-393, 2009.

Helpa, V., Rybacki, E., Abart, R., Morales, L.F.G., Rhede, D., Jeřábek, P., Dresen, G.: Reaction kinetics of dolomite rim growth. Contributions to Mineralogy and Petrology, 167, 1-14, 2014.

Helpa, V., Rybacki, E., Morales, L. F. G., Dresen, G.: Influence of stress and strain on dolomite rim growth: a comparative study. Contributions to Mineralogy and Petrology, 170, 1-21, 2015.

- Hisada, K., Miyano, T.: Petrology and microthermometry of aluminous rocks in the Botswanan Limpopo Central Zone: evidence for isothermal decompression and isobaric cooling, *Journal of Metamorphic Geology*, 14, 183-197, 1996.
- Holland, T. J. B., Powell, R.: An internally consistent thermodynamic data set for phases of petrological interest, *Journal of Metamorphic Geology*, 16, 309-343, 1998.
- 5 Holland, T. J. B., Powell, R.: Activity-composition relations for phases in petrological calculations: an asymmetric multicomponent formulation, *Contributions to Mineralogy and Petrology*, 145, 492-501, 2003.
- Holland, T. & Powell, R.: An improved and extended internally consistent thermodynamic dataset for phases of petrological interest, involving a new equation of state for solids, *Journal of Metamorphic Geology*, 29, 333-383, 2011.
- Hollis, J. A., Harley, S. L., White, R. W., Clarke, G. L.: Preservation of evidence for prograde metamorphism in ultrahigh-  
10 temperature, high-pressure kyanite-bearing granulites, South Harris, Scotland, *Journal of Metamorphic Geology*, 24, 263-279, 2006.
- Indares, A.: Eclogitized gabbros from the eastern Grenville Province: textures, metamorphic context, and implications, *Canadian Journal of Earth Science*, 30, 159-173, 1993.
- Ings, S. J., Owen, J. V.: 'Decompressional' reaction textures formed by isobaric heating: an example from the thermal aureole of the Taylor Brook Gabbro Complex, western Newfoundland, *Mineralogical Magazine*, 66, 941-951, 2002.
- 15 [Joachim, B., Gardés, E., Abart, R., Heinrich, W.: Experimental growth of ackermanite reaction rims between wollastonite and monticellite: evidence for volume diffusion control. \*Contributions to Mineralogy and Petrology\*, 161, 389-399, 2011a.](#)
- [Joachim, B., Gardés, E., Velickov, B., Abart, R., and Heinrich, W.: Experimental growth of diopside+merwinite reaction rims: the effect of water on microstructure development. \*American Mineralogist\*, 97, 220-230, 2011b.](#)
- 20 Joesten, R.: Evolution of mineral zoning in diffusion metasomatism, *Geochimica et Cosmochimica Acta*, 41, 649-670, 1977.
- Joesten, R.: The role of magmatic reaction, diffusion and annealing in the evolution of coronitic microstructure in troctolitic gabbro from Risør, Norway, *Mineralogical Magazine*, 50, 441-467, 1986.
- Joesten, R., Fisher, G. W.: Kinetics of diffusion-controlled mineral growth in the Christmas Mountains (Texas) contact aureole, *Geological Society of America Bulletin*, 100, 714-732, 1988.

- Johnson, C. D., Carlson, W. D.: The origin of olivine-plagioclase coronas in metagabbros from the Adirondack Mountains, New York, *Journal of Metamorphic Geology*, 8, 697-717, 1990.
- Johnson, T. E., Brown, M., Gibson, R. L., Wing, B.: Spinel-cordierite symplectites replacing andalusite: evidence for melt-assisted diapirism in the Bushveld Complex, South Africa, *Journal of Metamorphic Geology*, 22, 529-545, 2004.
- 5 [Jonas, L., Mueller, T., Dohmen, R., Baumgartner, L., Putlitz, B.: Transport-controlled hydrothermal replacement of calcite by Mg-carbonates, \*Geology\*, 43,779-783, 2015.](#)
- [Kelsey, D. E., White, R. W., Powell, R.: Orthopyroxene-sillimanite-quartz assemblages: distribution, petrology, quantitative P-T-X constraints and P-T paths, \*Journal of Metamorphic Geology\*, 21, 439-453, 2003a.](#)
- 10 [Keller, L.M., Götze, L.C., Rybacki, E., Dresen, G., Abart, R.: Enhancement of solid-state reaction rates by non-hydrostatic stress effects on polycrystalline diffusion kinetics, \*American Mineralogist\*, 95, 1399-1407, 2010.](#)
- Kelsey, D. E., White, R. W., Powell, R., Wilson, C. J. L., Quinn, C. D.: New constraints on metamorphism in the Rauer Group, Prydz Bay, east Antarctica, *Journal of Metamorphic Geology*, 21, 739-759, 2003b.
- Koons, P. O., Rubie, D. C., Fruch-Green, G.: The Effects of Disequilibrium and Deformation on the Mineralogical Evolution of Quartz Diorite During Metamorphism in the Eclogite Facies, *Journal of Petrology*, 28, 679-700, 1987.
- 15 Korzhinskii, D. S.: Physicochemical Basis of the Analysis of the Paragenesis of Minerals, Consultants Bureau, New York, 142, 1959.
- Korzhinskii, D. S.: The theory of systems with perfectly mobile components and processes of mineral formation, *American Journal of Science*, 263, 193-205, 1965.
- Kretz, R.: Symbols for rock-forming minerals, *American Mineralogist*, 68, 277-279, 1983.
- 20 Kriegsman, L. M., Schumacher, J. C.: Petrology of sapphirine-bearing and associated granulites from central Sri Lanka, *Journal of Petrology*, 40, 1211-1239, 1999.
- Lal, R. K., Ackermann, D., Upadhyay, H.: P-T-X relationships deduced from corona textures in sapphirine-spinel-quartz assemblages from Paderu, southern India, *Journal of Petrology*, 28, 1139-1168, 1987.
- 25 [Lasaga, A.C.: Geospeedometry: an extension of geothermometry in: Saxena SK \(ed\) Kinetics and equilibrium in mineral reactions, Springer, New York, 81-114, 1983.](#)

Markl, G., Foster, C. T., Bucher, K.: Diffusion-controlled olivine corona textures in granitic rocks from Lofoten, Norway: calculation of Onsager diffusion coefficients, thermodynamic modelling and petrological implications, *Journal of Metamorphic Geology*, 16, 607-623, 1998.

McFarlane, C. R. M., Carlson, W. D., Connelly, J. N.: Prograde, peak, and retrograde P-T paths from aluminium in orthopyroxene: High-temperature contact metamorphism in the aureole of the Makhavinekh Lake Pluton, Nain Plutonic Suite, Labrador, *Journal of Metamorphic Geology*, 21, 405-423, 2003.

[Milke, R., Heinrich, W.: Diffusion-controlled growth of wollastonite rims between quartz and calcite: comparison between nature and experiment, \*Journal of Metamorphic Geology\*, 20, 467-480, 2002.](#)

[Milke, R., Wiedenbeck, M., Heinrich, W.: Grain boundary diffusion of Si, Mg, and O in enstatite reaction rims: a SIMS study using isotopically doped reactants, \*Contributions to Mineralogy and Petrology\*, 142, 15-26, 2001.](#)

[Milke, R., Wirth, R.: The formation of columnar fiber texture in wollastonite rims by induced stress and implications for diffusion-controlled corona growth, \*Physics and Chemistry of Minerals\*, 30, 230-242, 2003.](#)

Mongkoltip, P., Ashworth, J. R.: Quantitative estimation of an open-system symplectite-forming reaction: restricted diffusion of Al and Si in coronas around olivine, *Journal of Petrology*, 24, 635-661, 1983.

Mork, M. B. E.: Coronite and eclogite formation in olivine gabbro (Western Norway): reaction paths and garnet zoning, *Mineralogical Magazine*, 50, 417-426, 1986.

[Mueller, T., Baumgartner, L.P., Foster, C.T. Jr., Roselle, G.T.: Forward modeling of the effects of mixed volatile reaction, volume diffusion, and formation of submicroscopic exsolution lamellae on calcite-dolomite thermometry, \*American Mineralogist\*, 93, 1245-1259, 2008.](#)

[Mueller, T., Cherniak, D., Watson, B.: Interdiffusion of divalent cations in carbonates: experimental measurements and implications for timescales of equilibration and retention of compositional signatures, \*Geochim Cosmochim Acta\*, 84, 90-103, 2012.](#)

[Mueller, T., Massonne, H.J., Willner, A.P.: Special Collection: Mechanisms, Rates, and Timescales of Geochemical Transport Processes in the Crust and Mantle. Timescales of exhumation and cooling inferred by kinetic modeling: An example using a lamellar garnet pyroxenite from the Variscan Granulite, \*American Mineralogist\*, 100, 747-759, 2015.](#)

- [Mueller, T., Watson, E.B., and Harrison, T.M., 2010.: Applications of diffusion data to high-temperature earth systems in Zhang, Y., and Cherniak, D., eds., Diffusion in Minerals and Melts: Reviews in Mineralogy and Geochemistry, v. 72, p. 997–1038., 2010.](#)
- [Niedermeier, D., Putnis, A., Geisler, T., Golla-Schindle, U., Putnis, C.: The mechanism of cation and oxygen isotope exchange in alkali feldspars under hydrothermal conditions, Contributions to Mineralogy and Petrology, 157, 65-75. 2009.](#)
- 5 Nishiyama, T.: Steady diffusion model for olivine-plagioclase corona growth, Geochimica et Cosmochimica Acta, 41, 649-670, 1983.
- Norlander, B. H., Whitney, D. L., Teyssier, C., Vanderhaeghe, O.: Partial melting and decompression of the Thor-Odin dome, Shuswap metamorphic core complex, Canadian Cordillera, Lithos, 61, 103-125, 2002.
- 10 Ogilvie, P.: Metamorphic Studies in the Vredefort Dome, Unpublished Ph.D. thesis, University of Witwatersrand, Johannesburg, 772pp, 2010.
- Osanai, Y., Nakano, N., Owada, M.: Permo-Triassic ultrahigh-temperature metamorphism in the Kontum Massif, central Vietnam, Journal of Mineralogical and Petrological Sciences, 99, 225-241, 2004.
- Perchuk, L. L., Tokarev, D. A., van Reenen, D. D., Varlamov, D. A., Gerya, T. V., Sazonova, L. V., Fel'dman, V. I., Smit, C. A., Brink, M. C., Bisschoff, A. A.: Dynamic and Thermal History of the Vredefort Explosion Structure in the Kaapvaal Craton, South Africa, Petrology, 10, 395-432, 2002.
- 15 [Putnis, A.: Mineral replacement reactions, Reviews in Mineralogy and Geochemistry, 70, 87–124, 2009.](#)
- Powell, R., Guiraud, M., White, R. W.: Truth and beauty in metamorphic mineral equilibria: conjugate variables and phase diagrams, Canadian Mineralogist, 43, 21-33, 2005.
- 20 Powell, R., Holland, T. J. B.: An internally consistent thermodynamic dataset with uncertainties and correlations: 3: application methods, worked examples and a computer program, Journal of Metamorphic Geology, 6, 173-204, 1988.
- Powell, R., Holland, T. J. B.: Calculated mineral equilibria in the pelite system KFMASH (K<sub>2</sub>O-FeO-MgO-Al<sub>2</sub>O<sub>3</sub>-SiO<sub>2</sub>-H<sub>2</sub>O), American Mineralogist, 75, 367-380, 1990.
- Powell, R., Holland, T. J. B., Worley, B.: Calculating phase diagrams involving solid solutions via non-linear equations, with 25 examples using THERMOCALC, Journal of Metamorphic Geology, 16, 577-588, 1998.

[Schmid, D. W., Abart, R., Podladtchikov, I., Milke, R.: Matrix rheology effects on reaction rim growth II: coupled diffusion and creep model, Journal of Metamorphic Geology, 27, 83-91, 2009.](#)

Sheplev, V. S., Kolobov, V. Yu., Kuznetsova, R. P., Reverdatto, V. V.: Analysis of growth of zoned mineral segregation and characteristics of mass transfer during metamorphism. 1. Theoretical model in a quasi-stationary approximation, Soviet Geol. Geophys., 32, 1-12, 1991.

Sheplev, V. S., Kuznetsova, R. P., Kolobov, V. Yu.: Analysis of growth of zoned mineral segregations and characteristics of mass transfer during metamorphism. 2. The system SiO<sub>2</sub>-Al<sub>2</sub>O<sub>3</sub>-MgO-NaCaO, Russian Geol. Geophys., 33, 73-80, 1992a.

Sheplev, V. S., Kuznetsova, R. P., Kolobov, V. Yu.: Analysis of growth of zoned mineral segregations and characteristics of mass transfer during metamorphism. 3. The model of steady diffusions, Russian Geol. Geophys., 33, 46-52, 1992b.

[Smit, C. A., Van Reenen, D. D., Gerya, T. V., Perchuk, L. L.: P-T conditions of decompression of the Limpopo high-grade terrain: record from shear zones, Journal of Metamorphic Geology, 19, 249-268, 2001.](#)

Štípská, P., Powell, R., White, R. & Baldwin, J.: Using calculated chemical potential relationships to account for coronas around kyanite: an example from the Bohemian Massif, Journal of Metamorphic Geology, 28, 97-116, 2010.

Stüwe, K.: Effective bulk composition changes due to cooling: a model predicting complexities in retrograde reaction textures, Contributions to Mineralogy and Petrology, 129, 43-52, 1997.

Tajčmanová, L., Konopásek, J. & Connolly, J.A.D.: Diffusion-controlled development of silica-undersaturated domains in felsic granulites of the Bohemian Massif (Variscan belt of Central Europe). Contributions to Mineralogy and Petrology, 153, 237-250, 2007

Thompson, J. B.: Local equilibrium in metasomatic processes, in: Researches in Geochemistry, Wiley, New York, 427-457, 1959.

Tracy, R. J., McLellan, E. L.: A natural example of the kinetic controls of compositional and textural equilibration, in: Advances in physical geochemistry 4, Springer-Verlag, 118-137, 1985.

Tsunogae, T., Van Reenen, D. D., : Corundum + quartz and Mg-staurolite bearing granulite from the Limpopo Belt, southern Africa: Implications for a P-T path, Lithos, 92, 576-587, 2006.

Van Lamoen, H.: Coronas in olivine gabbros and iron ores from Susimäki and Riuttamaa, Finland, Contributions to Mineralogy and Petrology, 68, 259-268, 1979.

Vidale, R.: Metasomatism in a chemical gradient and the formation of calc-silicate bands, American Journal of Science, 267, 857-874, 1969.

5 | [Watson E.B., Mueller, T.: Non-equilibrium isotopic and elemental fractionation during diffusion-controlled crystal growth under static and dynamic conditions, Chemical Geology, 267, 111-124, 2009.](#)

[Watson, E. B., Price, J. D.: Kinetics of the reaction  \$MgO + Al\_2O\_3 + 3MgAl\_2O\_4\$  and Al-Mg interdiffusion in spinel at 1200 to 2000 °C and 1.0 to 4.0 GPa, Geochimica et Cosmochimica Acta, 66, 2123–2138, 2002.](#)

10 | Wheeler, J., Mangan, L. S., Prior, D. J.: Disequilibrium in the Ross of Mull Contact Metamorphic Aureole, Scotland: a Consequence of Polymetamorphism, Journal of Petrology, 45, 835-853, 2004.

[White, R. W., Clarke, G. L.: The Role of Deformation in Aiding Recrystallization: an Example from a High-pressure Shear Zone, Central Australia, Journal of Petrology, 38, 1307-1329, 1997.](#)

White, R. W., Powell, R.: Melt loss and the preservation of granulite facies mineral assemblages, Journal of Metamorphic Geology, 20, 621-632, 2002.

15 | White, R. W., Powell, R.: On the interpretation of retrograde reaction textures in granulite facies rocks, Journal of Metamorphic Geology, 29, 131–149, 2011.

White, R. W., Powell, R., Baldwin, J. A.: Calculated phase equilibria involving chemical potentials to investigate the textural evolution of metamorphic rocks, Journal of Metamorphic Geology, 26, 181-198, 2008.

20 | White, R. W., Powell, R., Halpin, J. A.: Spatially-focussed melt formation in aluminous metapelites from Broken Hill, Australia, Journal of Metamorphic Geology, 22, 825-845, 2004.

Whitney, P. R., McLelland, J. M.: Origin of coronas in metagabbros of the Adirondack Mts., N.Y., Contributions to Mineralogy and Petrology, 39, 81-98, 1973.

[Yund, R. A.: Rates of grain boundary diffusion through enstatite and forsterite reaction rims, Contributions to Mineralogy and Petrology, 126, 224–236, 1997.](#)



Zhang, Y.: Diffusion in minerals and melts: theoretical background, Reviews in Mineralogy and Geochemistry, 72, 5-59, 2010.

Zulbati., F, Harley, S. L.: Late Archaean granulite facies metamorphism in the Vestfold Hills, East Antarctica, Lithos, 93, 39-67, 2007.

5 |

Formatted: Line spacing: 1,5 lines

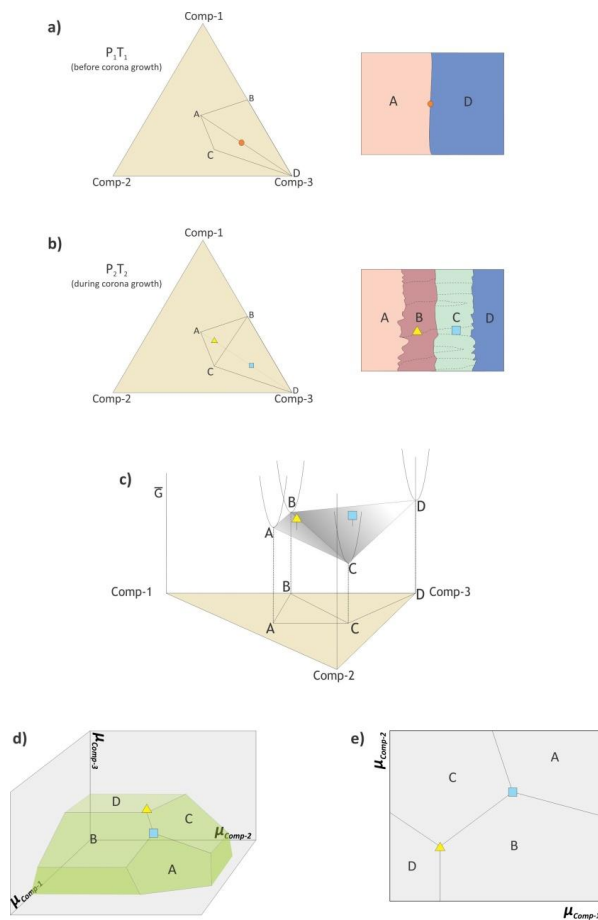

**Figure 1.** Chemographic relationships and chemical potential saturation surfaces for local transient equilibria at corona boundaries during incipient stages of single-stage, steady-state, diffusion-controlled corona growth (after Joesten, 1977). (a) Original phases (A and D) initially at equilibrium under  $P_1$  and  $T_1$  with bulk composition indicated by the circle. (b) ~~Under new~~  $P$  and  $T$  conditions ( $P_2$ ,  $T_2$ )-~~are kinetically inhibited and~~ reaction progress becomes diffusion-controlled. The corona domain is partitioned into a continuum of compositional subdomains, or incipient "effective bulk compositions" (triangle, square), each with unique chemical potentials, in which local equilibrium is attained. (c) Ternary G-X surface, in which local equilibria are separated by chemical potential differences. (d) The chemical potential saturation surface for each of the local phase assemblages. (e) Projection of the saturation surface on the  $\mu_{\text{Comp-1}}-\mu_{\text{Comp-2}}$  plane. Chemical potential gradients between local equilibria drive diffusion of components from one compositional domain to another until chemical potentials are equalised and equilibrium is attained.

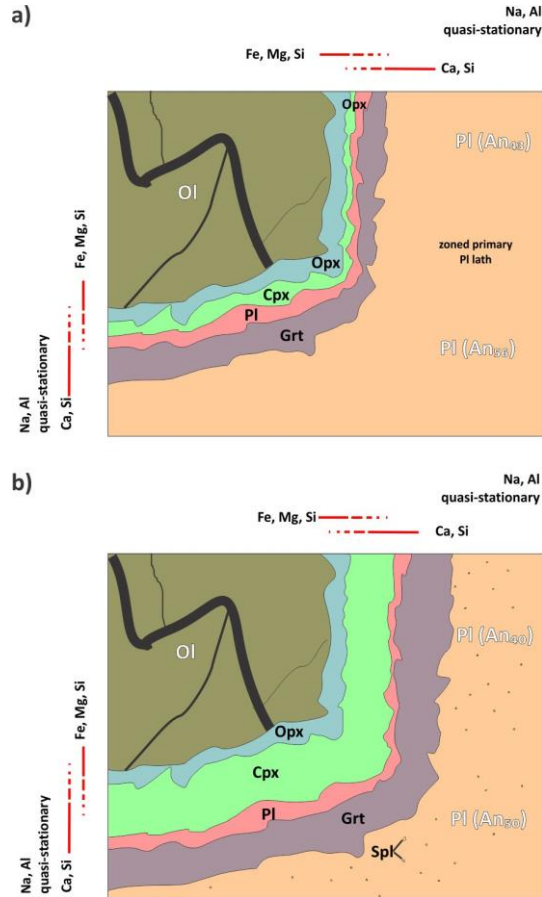

5 **Figure 2.** Open-system, continuous, single-stage, steady-state, diffusion-controlled growth of prograde corona layers between olivine and plagioclase (modified after Johnson and Carlson, 1990). (a) With incipient reaction, different rates of intergranular diffusion for major components manifest as spatially segregated layers. The corona domain is partitioned into a continuum of compositional subdomains or incipient effective bulk compositions in which local equilibrium is attained, each with unique chemical potentials. Fe, Mg and Si released from olivine diffuse down chemical potential gradients toward plagioclase, whereas Na, Ca, Al and Si released from plagioclase diffuse toward olivine. Layers comprising the slowest diffusing species (Al) adjoin the most aluminous reactant. (b) Reactions occur at layer boundaries and layers expand as diffusion progresses. The width and composition of each corona layer depend on the relative fluxes of the diffusing elements. Minor spinel clouding occurs in reactant plagioclase as Ca and Si diffuse preferentially into the reaction band, creating a Si deficiency in reactant plagioclase. Phases the diagrams are labelled using Kretz (1983) mineral abbreviations.

10

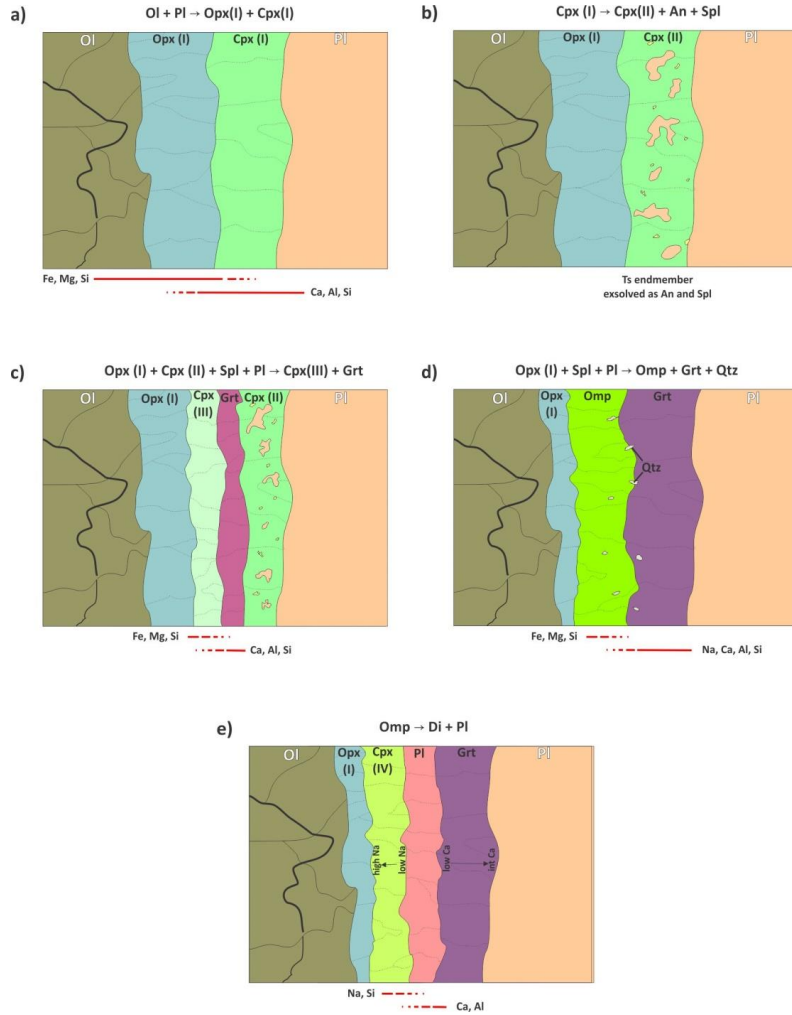

**Figure 3.** Non-continuous, multi-stage, sequential layer development in a corona between olivine and plagioclase formed in response to changing  $P$  and  $T$  along the  $P$ - $T$  path shown in Fig. 2 (after Griffin, 1972). (a) Original olivine and plagioclase react to form orthopyroxene and clinopyroxene. (b) Clinopyroxene breaks down to form a less Tschermakitic composition with plagioclase and spinel. (c) Clinopyroxene reacts with orthopyroxene, spinel and plagioclase to produce garnet. (d) Orthopyroxene reacts with spinel and plagioclase to produce omphacite, garnet and quartz. (e) Omphacite decomposes to clinopyroxene and plagioclase.

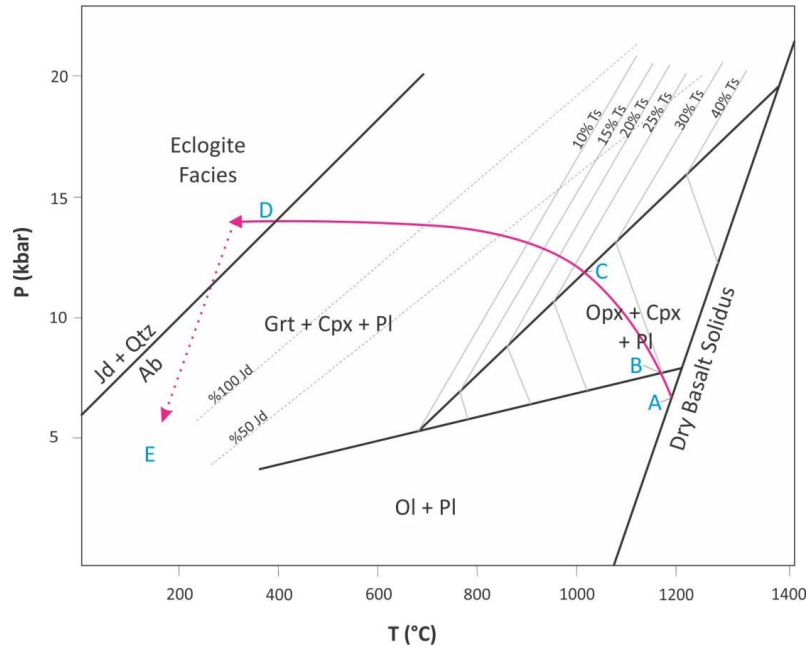

**Figure 4.** *P-T* grid indicating univariant equilibria crossed during cooling to produce the sequence of reactions in Fig. 1 (after Griffin, 1972).

5

10

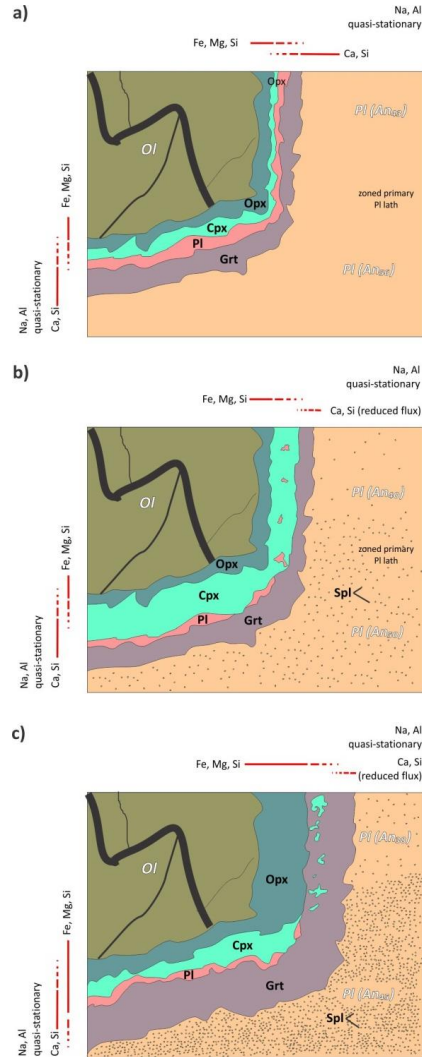

5 **Figure 5.** Non-continuous, multi-stage, sequential layer corona layer development at constant  $P$  and  $T$  in response to waning boundary fluxes of rapidly diffusing components from the reactants into the corona in an open system (after Johnson and Carlson, 1990). (a) Initial steady-state layer configuration for an olivine-plagioclase corona. (b) Depletion of Ca and Si in the reactants leads to the consumption of plagioclase, and then (c) clinopyroxene, in transient states. The system gradually evolves toward a new steady state. Cannibalisation of corona plagioclase and clinopyroxene is more enhanced where the original reactant is Ca-poor (top-right,  $An_{38}$ ).

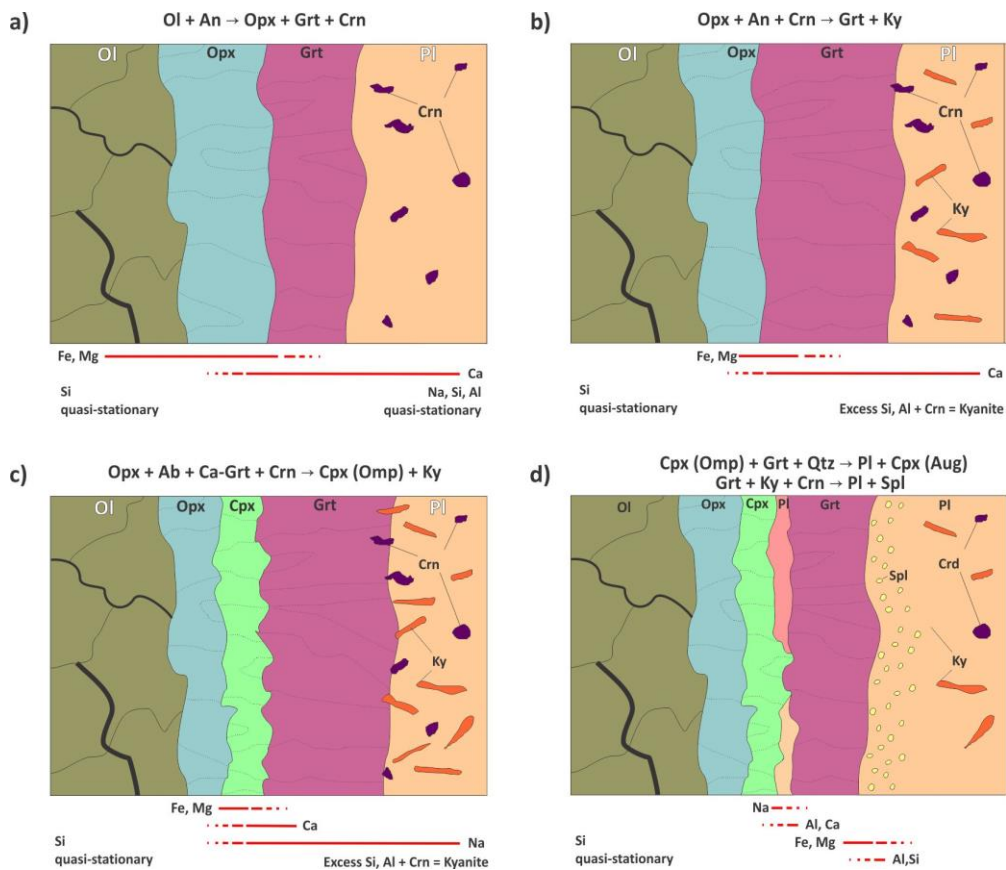

**Figure 6.** Non-continuous, multi-stage, sequential corona layer development between plagioclase and olivine owing to varying component fluxes across the corona bands and, later, owing to decompression (modified after Indares, 1993). Corona layer growth in (a)-(c) occurs under constant high  $P$  and  $T$ , initially from discrete reactions between reactants and then subsequently between individual corona layers as component fluxes vary across the corona. The formation of the plagioclase layer in (d) is ascribed to decompression. Detailed reaction mechanisms are discussed in the text.

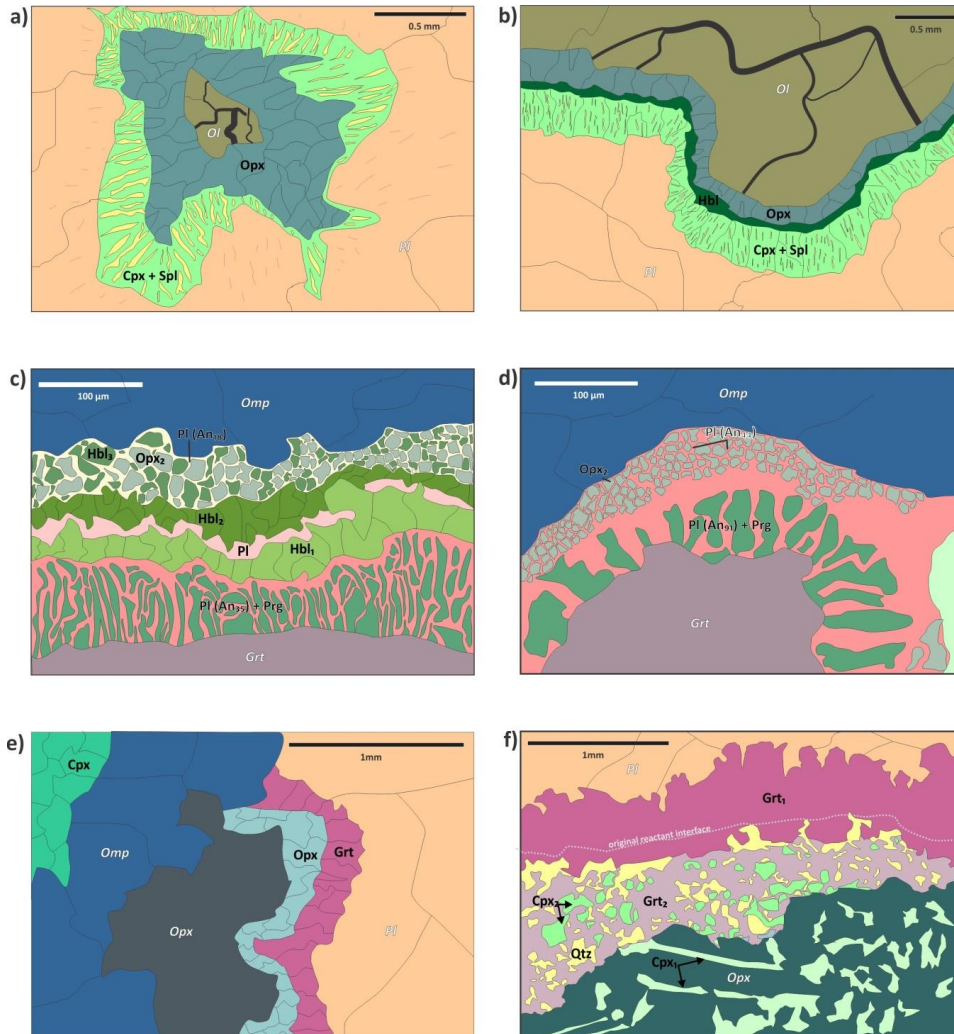

**Figure 7.** Common corona textures developed in mafic granulites. (a) Prograde corona developed between olivine and plagioclase during burial following shallow intrusion in the southwestern Adirondacks, New York (after Whitney and McLelland, 1973). Garnet is not present in this corona owing to low inferred pressures during corona reaction. There is no variation in  $X_{Mg}$  of pyroxenes. (b) A retrograde corona developed between olivine and plagioclase in an olivine metagabbro from northeast Scotland (after Mongkoltip and Ashworth,



1983). The presence of amphibole suggests higher  $a\text{H}_2\text{O}$  than in more anhydrous domainal compositions where only clinopyroxene is stable. Al content and  $X_{\text{Fe}}$  of Opx and Hbl increase toward Pl reactant. c) Retrograde corona developed between garnet and clinopyroxene during a static thermal event with the intrusion of numerous granite plutons in the Llano Uplift, Texas (after Carlson and Johnson, 1991). The presence of hornblende implies relatively high  $a\text{H}_2\text{O}$  during reaction. Both hornblende and plagioclase are asymmetrically zoned across the corona band. Plagioclase becomes less calcic ( $\text{An}_{35}$  to  $\text{An}_{18}$ ) and amphibole Fe/Mg and Al/Si ratios decrease toward omphacite. 5 (d) Retrograde corona developed between garnet and clinopyroxene from the Snowbird Tectonic Zone, Western Canadian Shield (after Baldwin et al., 2004). The restricted distribution of hornblende in this corona compared to that in (c), suggests a less hydrous bulk corona composition. Marked zonation in plagioclase occurs from  $\text{An}_{91}$  adjacent garnet to  $\text{An}_{44}$  at clinopyroxene margin. (e) Prograde corona developed between plagioclase and orthopyroxene during deformation-enhanced reaction in a dolerite towards a shear zone (after White 10 and Clarke, 1997). Garnet exhibits asymmetric zonation as  $X_{\text{Alm}}$ ,  $X_{\text{Prp}}$  and  $X_{\text{Grs}}$  increase toward Pl. Garnet zoning diminishes toward shear zone. (f) Prograde corona developed between plagioclase and orthopyroxene in a mafic granulite from Yenisey Ridge, Siberia (after Ashworth et al., 1998). Layer 1 garnet ( $\text{Grt}_1$ ) is zoned: Fe increases and Ca decreases ( $X_{\text{Grs}}$ : 0.24 - 0.21;  $X_{\text{Alm}}$ : 0.54 - 0.60) toward layer 2. A slight compositional perturbation across layer 1 is thought to mark the initial Pl/Opx boundary. In layers 3 and 4, Ca in garnet is almost constant, with higher Fe and lower Mg than in layer 1. No systematic zonation is observed in pyroxene. Non-equilibrium 15 thermobarometric estimates for corona formation are  $740 \pm 20$  °C and  $9.5 \pm 0.7$  kbar (Ashworth et al., 2001).

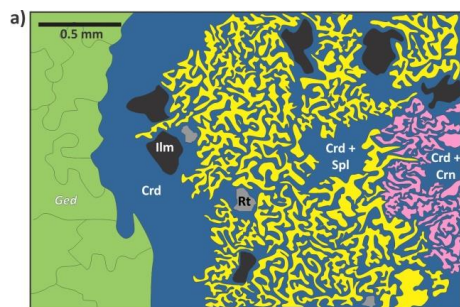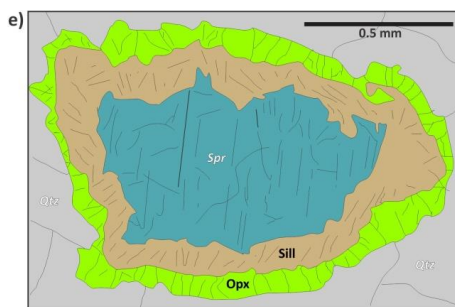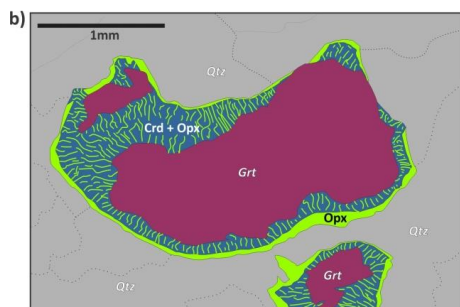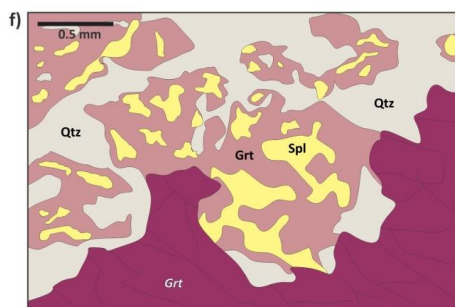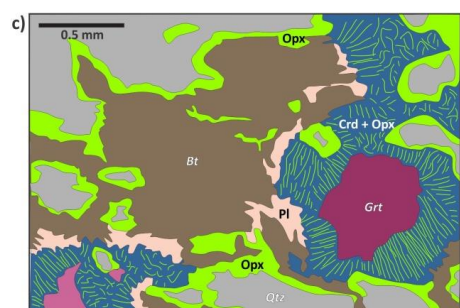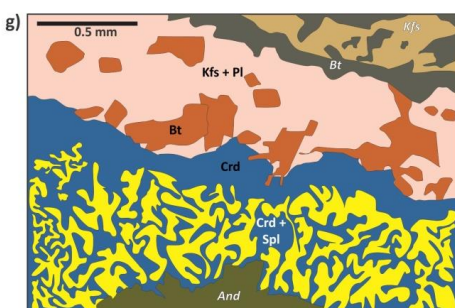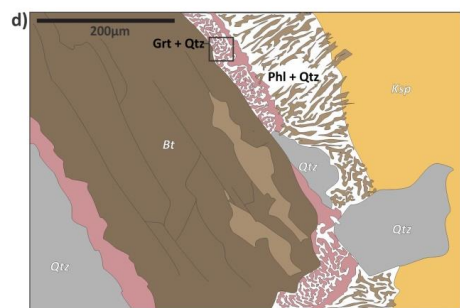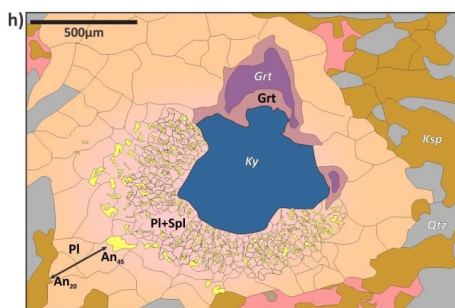

**Figure 8:** Sectoral complexity in corona textures developed in pelitic granulites. (a) Complex corona between kyanite and gedrite (after Norlander et al., 1996). No compositional variation in any corona phases was observed. Conditions of formation constrained at < 5 kbar and ~ 750 °C with TWQ and conventional thermobarometers. (b) Common complex corona developed after garnet and quartz (after Hollis et al., 2006). No systematic variation is described in corona products. (c) Complex sectoral corona between garnet, biotite and quartz. Monomineralic plagioclase is constrained to the corona immediately adjacent to biotite. Similarly, blocky orthopyroxene occurs only in the corona sectors where garnet reacts with quartz (after Kelsey et al., 2003b). Cordierite  $X_{Mg}$  varies across symplectite increasing toward orthopyroxene in general. No variation in orthopyroxene composition is observed. (d) Symplectite-dominated corona developed between biotite and K-feldspar (after Bruno et al., 2001). Where biotite reacts with quartz, monomineralic garnet comprises the corona. Elsewhere, a complex, symplectite-dominated corona comprising garnet, quartz and phlogopite occurs where biotite and feldspar react. Corona garnet is weakly zoned. (e) Monomineralic sillimanite and orthopyroxene developed after sapphirine and quartz (after Ellis et al., 1980 and Grew, 1980). (f) Retrograde spinel-garnet symplectite replacing peak garnet during post-peak decompression (after White et al., 2002). This corona develops in response to changing modes in a high variance equilibrium assemblage. No univariant reaction is crossed. (g) Prograde complex corona comprising spinel-cordierite symplectite and leucocratic biotite, K-feldspar and plagioclase after andalusite (after Johnson et al., 2004).  $X_{Mg}$  of cordierite decreases toward biotite (0.55 - 0.51) with no variation in spinel composition. Cordierite moat formation occurs during an andalusite melting reaction consuming quartz and biotite, followed by continued breakdown of andalusite to cordierite-spinel symplectite in  $SiO_2$  deficient domains. (h) Sectoral replacement of kyanite by plagioclase+spinel symplectite and zoned monomineralic plagioclase. Where primary garnet abuts kyanite, the symplectite is not developed, and kyanite is replaced by low-Ca garnet enclosed by unzoned plagioclase (After Štípská et al., 2009).

20

25

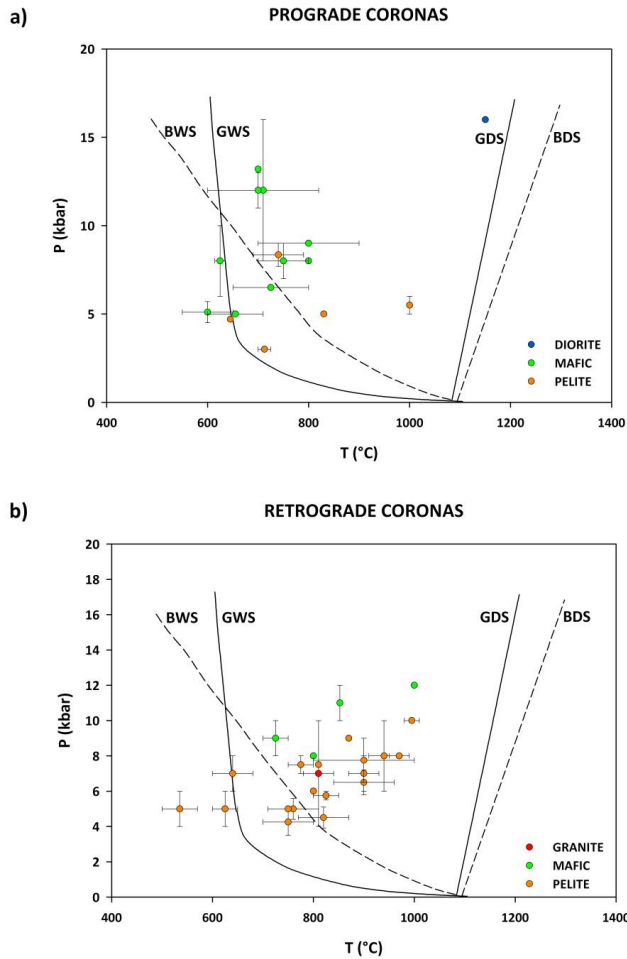

**Figure 9:** Summary of  $P$ - $T$  conditions of formation for coronas reviewed in this study. (a)  $P$ - $T$  conditions for prograde coronas. (b)  $P$ - $T$  conditions for retrograde coronas. In general, conditions of corona formation occur above the wet solidus for each respective bulk composition. The few coronas that plot at lower temperatures than the wet solidi may be subject to retrograde diffusional resetting of the thermometers and, in reality, may have formed at higher suprasolidus temperatures. Error bars are for the range of each estimate. BWS = wet basalt solidus; GWS = wet granite solidus; GDS = dry granite solidus and BDS = dry basalt solidus. Solidi were digitised in  $P$ - $T$  space from geosciences resource database available at <http://www.geosci.usyd.edu.au/users/prey/Granite/Granite.html>

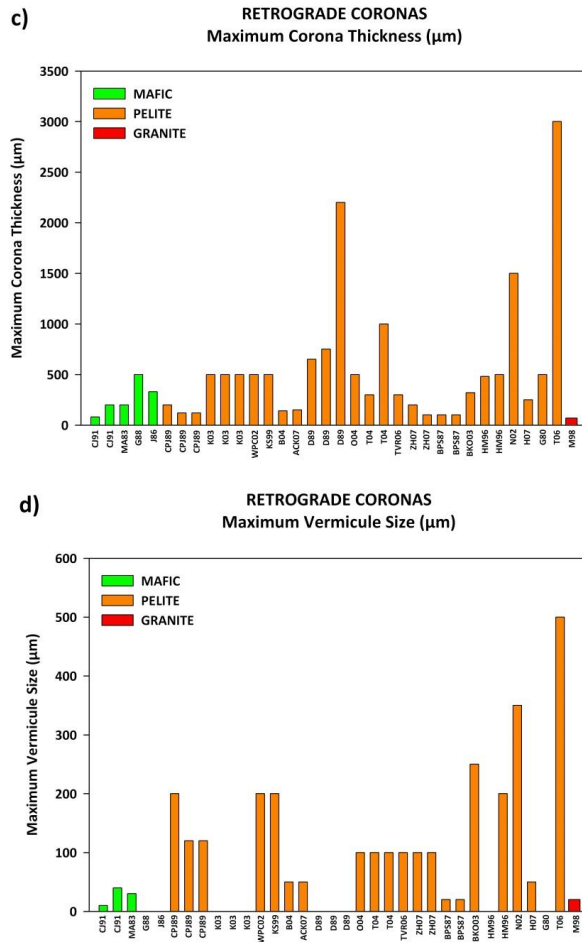

**Figure 10:** Variation in corona microstructure in mafic and pelitic bulk rock compositions. (a) Variation in maximum corona thickness in prograde coronas. (b) Variation in maximum vermicule size/vermicule length in prograde coronas. Hatched bars are prograde coronas from contact aureoles. Each corona reference is tagged by a code (e.g., WM73) which correlated with the detailed characteristics of each corona in the Tables included in Appendix 1.

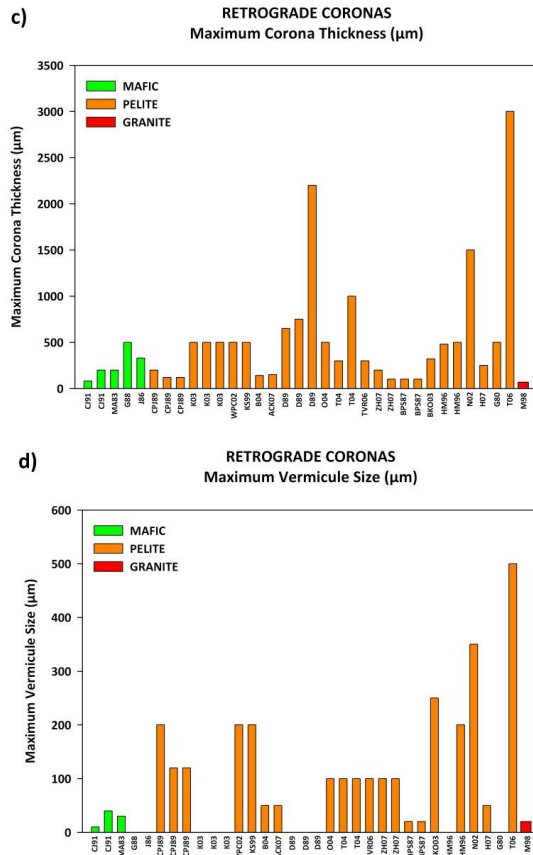

**Figure 11:** Variation in corona microstructure in mafic and pelitic bulk rock compositions. (c) Variation in maximum corona thickness in retrograde coronas. (d) Variation in maximum ~~vermicule size~~vermicule length in retrograde coronas.

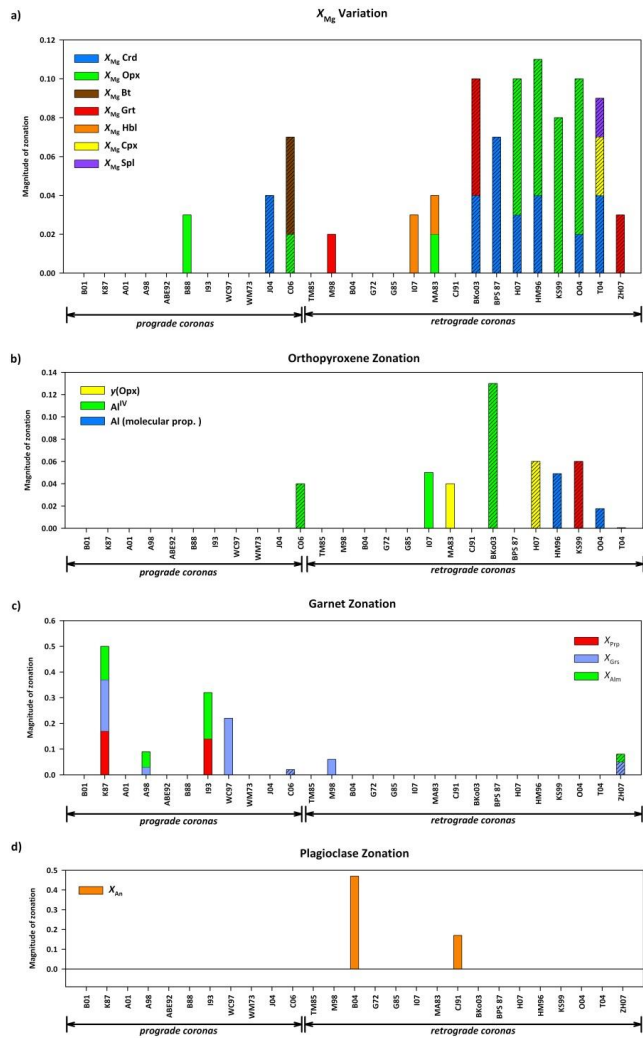

**Figure 12:** Magnitude of compositional zonation in product corona bands. Hatched fields indicate pelitic bulk rock compositions; unhatched are mafic. (a)  $X_{Me}$  variation in product phases. (b) Variation in Al content in orthopyroxene across each corona (c) Garnet zonation across each corona. (d) Plagioclase zonation across coronas where it is documented.

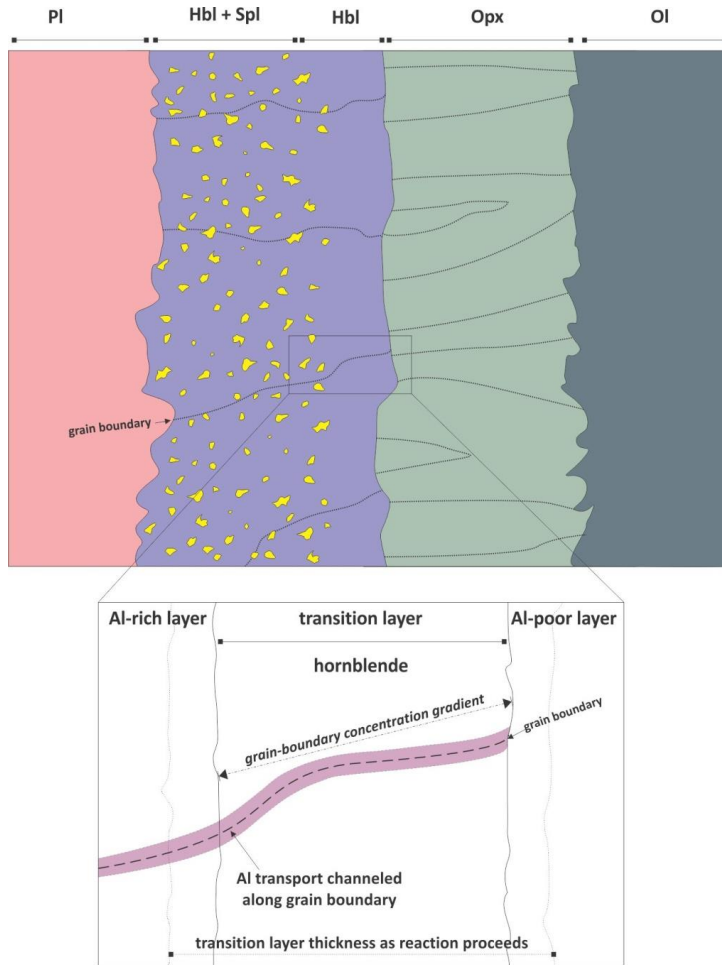

**Figure 13:** Sketch of a typical corona developed between plagioclase and olivine in metagabbros (after Ashworth, 1993). As reaction proceeds, layers grow by diffusion along grain boundaries of requisite components down concentration gradients to layer boundaries where they are consumed in the production of product phases. Al is considered to be the most immobile diffusing species, since Al concentration gradients are most marked. Al exerts the greatest control on segregation of corona products in bands, from the most Al-rich symplectite adjacent to plagioclase to Al-poor orthopyroxene adjacent to olivine.



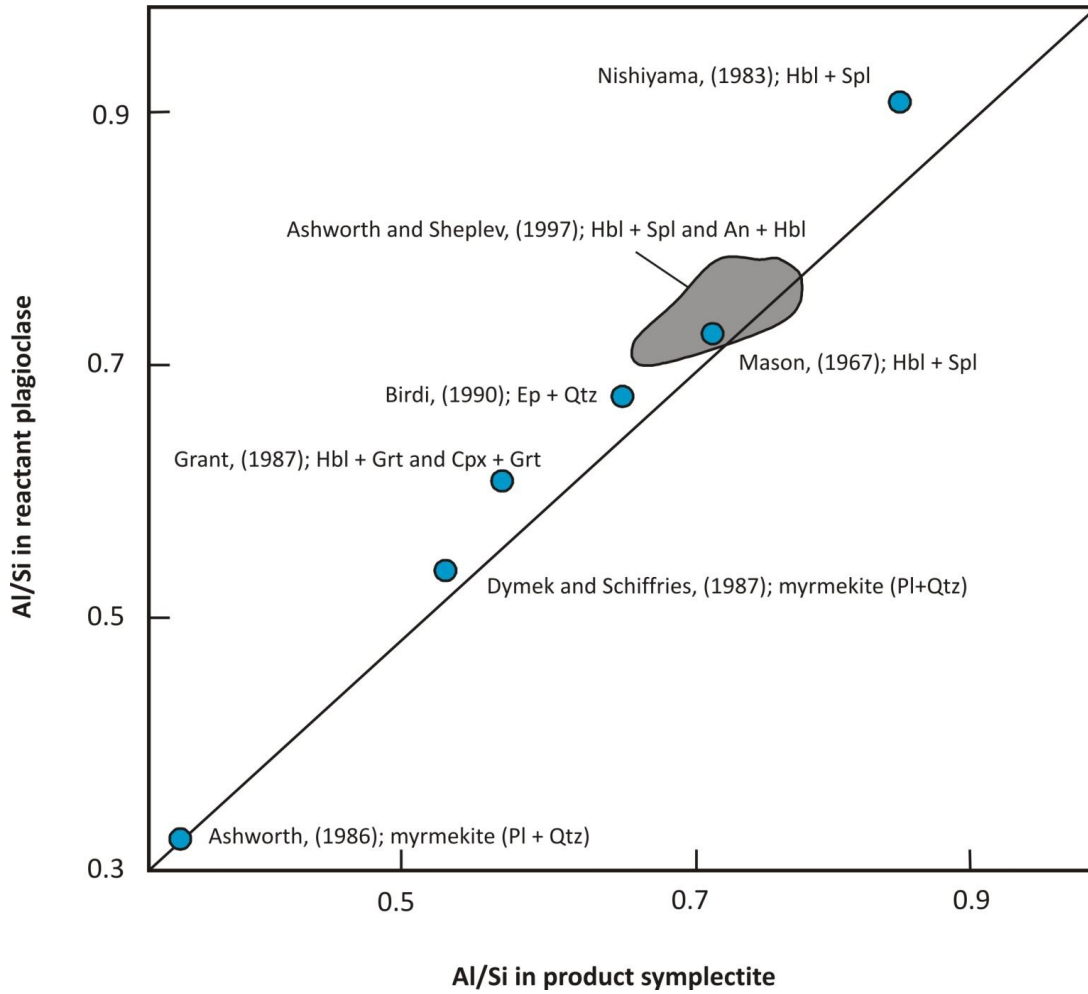

**Figure 14:** Isocon plot of Al/Si ratios in symplectites and the adjacent reactant plagioclase. The isocon line represents Al/Si ratios that are preserved exactly between reactant and products. Any deviation from this line indicates a degree of open-system behaviour. In general, analysed symplectites from the literature plot above the isocon line, suggesting that the Al/Si ratio is lower in the product symplectite than it is in the reactant plagioclase, i.e., the corona system is losing Al to the external system relative to Si with prolonged reaction.

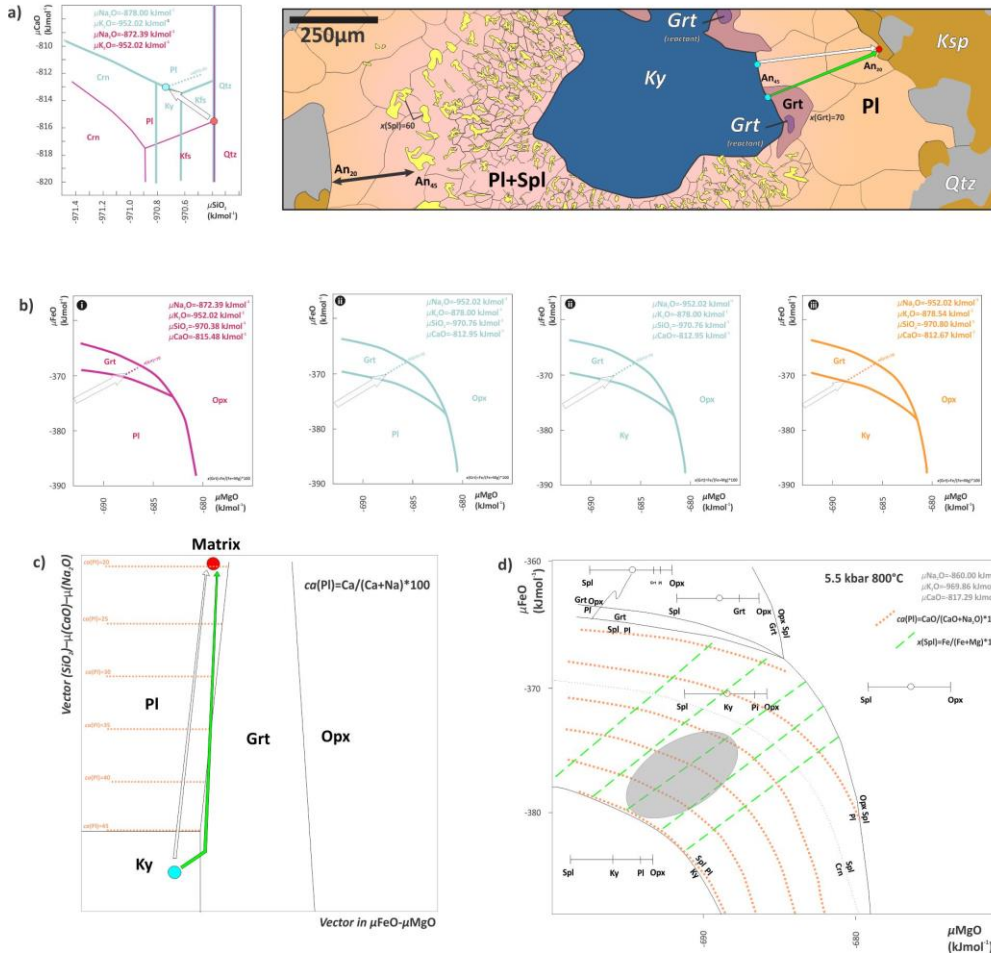

**Figure 15:** Chemical potential relationships governing the development of a corona after kyanite (after Štípská et al., 2009). All component chemical potentials referred to apply to those within the phases in the local equilibria under consideration (a) Calculated  $\mu(\text{SiO}_2)-\mu(\text{CaO})$  diagrams in the NCKAS system for the matrix (red lines) and the kyanite boundary (light blue lines). Gradients in the chemical potentials from the matrix to the kyanite–plagioclase boundary are represented by a vector in  $\mu(\text{SiO}_2)-\mu(\text{CaO})-\mu(\text{Na}_2\text{O})$  space. (b) Superimposed  $\mu(\text{MgO})$  and  $\mu(\text{FeO})$  variations on the  $\mu(\text{SiO}_2)-\mu(\text{CaO})-\mu(\text{Na}_2\text{O})$  vector from (a): (i) for the matrix, (ii) for the plagioclase–kyanite boundary and (iii) inside kyanite. The topology shows garnet and orthopyroxene fields while spinel is metastable. Garnet compositional isopleths  $x(\text{Grt})$  are plotted within the garnet stability field. The arrow is a vector coincident with the  $x(\text{Grt}) = 70$

isopleth, where  $x(\text{Grt}) = \text{Fe}/(\text{Fe} + \text{Mg}) * 100$ . (c) Phase topology obtained by manual combination of the calculated phase relations along a slice at approximately fixed  $\mu(\text{MgO})/\mu(\text{FeO})$  (along  $x(\text{g}) = 70$ ) from (b) with the calculated phase relations along the vector  $\mu(\text{SiO}_2) - \mu(\text{CaO}) - \mu(\text{Na}_2\text{O})$  from (a), contoured with compositional isopleths  $ca(\text{pl})$ . The dashed arrow shows a path from kyanite across garnet and plagioclase towards the matrix. (d)  $\mu(\text{FeO}) - \mu(\text{MgO})$  diagrams along the  $ca(\text{Pl})=45$  line calculated at 800°C and 5.5 kbar.  $\text{SiO}_2$  and  $\text{Al}_2\text{O}_3$  are immobile. Fields are labelled with  $\text{Al}_2\text{O}_3 - \text{SiO}_2$  bar diagrams and contoured for  $x(\text{Grt})$ ,  $x(\text{Spl})$  and  $ca(\text{Pl})$ . Grey ellipses show regions of plagioclase–spinel symplectite where mineral compositions correspond to observed values ( $ca(\text{Pl}) = 35\text{--}45$  mol.% and  $x(\text{Spl}) = 60\text{--}63$ ).

Formatted: Line spacing: 1,5 lines

## Appendix 1

**Table 1: Summary of prograde corona occurrences in the literature**

| Tag  | Bulk comp                             | Location                                                     | Reactants                                                                            | Corona product assemblage                                                                                                                                | Corona Thickness, <a href="#">Vermiculate-size Vermiculate length</a> ,<br><a href="#">Vermiculate spacing</a>                                                                                                                                                                                                                  | Equilibration                                                                                                                                                                                                                                                                   | P, T of corona formation                                                                                                                                         | Inferred P-T path        | Layer growth model                                                           | Diffusion model                                                     | Comments                                                                                                                                                                                                                                                                                                                                                                                       |
|------|---------------------------------------|--------------------------------------------------------------|--------------------------------------------------------------------------------------|----------------------------------------------------------------------------------------------------------------------------------------------------------|---------------------------------------------------------------------------------------------------------------------------------------------------------------------------------------------------------------------------------------------------------------------------------------------------------------------------------|---------------------------------------------------------------------------------------------------------------------------------------------------------------------------------------------------------------------------------------------------------------------------------|------------------------------------------------------------------------------------------------------------------------------------------------------------------|--------------------------|------------------------------------------------------------------------------|---------------------------------------------------------------------|------------------------------------------------------------------------------------------------------------------------------------------------------------------------------------------------------------------------------------------------------------------------------------------------------------------------------------------------------------------------------------------------|
| JC90 | Olivine metagabbro                    | Adirondack Mountains, New York                               | OI - Pl                                                                              | $OI   Opx   Cpx   Grt   Pl$<br>$OI   Opx + Cpx   Pl   Grt   Pl$                                                                                          | Corona thickness: 250 $\mu m$<br><a href="#">Vermiculate-size Vermiculate length</a> : 4 - 50 $\mu m$<br>Vermiculate spacing: 8 $\mu m$ (measured from BSE images)<br>Vermiculate Shape: Columnar Opx and Grt (cannibalised Pl and Cpx - vermicular)<br>Orientation: Columnar grains oriented perpendicular to grain boundaries | Complete - no variation in composition of corona product phases.                                                                                                                                                                                                                | Assuming pressure of 8 kbar, Grt-Cpx (Ellis and Green, 1979) thermometer:<br>Northern Adirondacks: 881 °C<br>Southern Adirondacks: 708 °C                        | IBC, anticlockwise       | <a href="#">SSDCSINGLE-STAGE</a><br>- gradual exhaustion of Pl as a reactant | Open: L ratios not constrained tightly                              | Formation at high pressure and low $a_{H_2O}$ . As Ca is depleted in reactant plagioclase, product plagioclase and clinopyroxene are 'cannibalised'. Geochronological evidence negates a magmatic origin and cooling from igneous temperatures at high pressures as a cause of reaction and, instead, invokes a much younger superimposed metamorphic event (cf. Whitney and McLelland, 1973). |
| N83  | Olivine metagabbro                    | Mt Ikoma, Osaka, Japan                                       | OI - Pl                                                                              | $OI   Opx   Hbl + Spl$ sympl   Pl                                                                                                                        | Corona thickness: 50 - 300 $\mu m$<br>Opx: < 30 $\mu m$<br>Hbl+Spl: < 60 $\mu m$<br><a href="#">Vermiculate-size Vermiculate length</a> : --<br>Vermiculate spacing: --<br>Vermiculate Shape: Hbl - fibrous rods and needles, Spl - vermicular<br>Orientation: Vermiculates and rods perpendicular to layer boundaries          | Dis-equilibrium - no systematic variation is observed.                                                                                                                                                                                                                          | Amphibolite facies - no quantitative thermobarometry                                                                                                             | Not specified            | <a href="#">SSDCSINGLE-STAGE</a>                                             | Closed: $L_{OI}/L_{Spl} > 1$ and $L_{OI}/L_{Spl} > L_{Hbl}/L_{Spl}$ |                                                                                                                                                                                                                                                                                                                                                                                                |
| J04  | Metapelite                            | Phepane Dome, Bushveld Complex Aureole                       | And - Bt+matrix                                                                      | $And   Crd + Spl$ sympl   $Crd   Kfs + Pl + Bt$ leucosome   35mol% fringe Bt + 15mol% matrix Crd, Kfs, Qtz, Bt                                           | Corona thickness: Crd+Spl sympl < 1 mm; Crd: < 0.5 mm<br><a href="#">Vermiculate-size Vermiculate length</a> : 0.01 - 0.25 mm<br>Vermiculate spacing: --<br>Vermiculate Shape: Crd - granoblastic-polygonal, Spl - vermicular; vermicules perpendicular to layer boundaries                                                     | Dis-equilibrium. $X_{Mg}$ of Crd decreases toward Bt (0.55 - 0.51); no variation in spinel composition.                                                                                                                                                                         | 700 - 725 °C, 3 kbar (P-T-X relationships from pseudosection)                                                                                                    | Clockwise                | <a href="#">SESEQUENTIAL</a>                                                 | None                                                                | Crd most formation during And + Bt melting reaction consuming quartz, followed by continued breakdown of And to Crd+Spl symplectite in SiO <sub>2</sub> deficient domains.                                                                                                                                                                                                                     |
| WC97 | Dolerite                              | Western Musgrave Block, Australia                            | Corona 1: Opx - Pl<br>Corona 2: Cpx - Pl<br>Corona 3: Cpx - Pl<br>Corona 4: Ilm - Pl | Corona 1: $Opx   Cpx   \pm Pl$ ; Grt   Pl<br>Corona 2: $Cpx$ ; Grt   Pl<br>Corona 3: $Cpx   Cpx$ ; Hbl   Pl<br>Corona 4: Ilm   Grt + Bt sympl   Grt   Pl | Corona thickness:<br>Corona 1: 0.25 mm<br>Corona 2: < 0.5 mm<br>Corona 3: < 0.2 mm<br><a href="#">Vermiculate-size Vermiculate length</a> : < 10 - 125 $\mu m$<br>Vermiculate spacing: --<br>Vermiculate Shape: Columnar Opx and subhedral, elongate Grt and Hbl oriented perpendicular to layer boundaries                     | No systematic variation in composition of Hbl, Pl (An <sub>20-25</sub> ) and Cpx. Garnet asymmetric zoning: $X_{Mg}$ , $X_{Fe}$ and $X_{Ca}$ increase toward Pl ( $X_{Ca} = 0.18 - 0.24$ to grossular peaks of up to $X_{Ca} = 0.4$ ). Grt zoning diminishes toward shear zone. | T ~ 750 °C and 12 - 14 kbar (core and rim compositions used in average P-T mode in THERMOCALC based on two assemblages: Grt, Pl, Cpx, Qtz and Grt, Pl, Hbl, Qtz) | -                        | Hybrid <a href="#">SSDCSINGLE-STAGE</a>                                      | None                                                                | Equilibration is enhanced in high strain domains via a reduction in grain size leading to an increase in intergranular area, enhanced intracrystalline diffusion and nucleation, increased permeability and fluid access (White and Clarke, 1997).                                                                                                                                             |
| B93  | Olivine gabbro                        | Shabogamo Intrusive Suite, Eastern Grenville Province        | Corona 1: OI - Pl<br>Corona 2: Opx - Pl                                              | Corona 1: $OI   Opx + Cpx   Pl   Grt   Pl$<br>Corona 2: $Opx   Cpx   Grt   Pl$                                                                           | Corona thickness:<br>Corona 1: < 1 mm<br>Corona 2: < 4 mm<br><a href="#">Vermiculate-size Vermiculate length</a> : --<br>Vermiculate spacing: --<br>Vermiculate Shape: Granoblastic-polygonal with no preferred orientation                                                                                                     | Asymmetrical zonation in Grt ( $X_{Mg}$ : 0.4 - 0.58 and $X_{Fe}$ : 0.17 - 0.24) from Pl toward Opx. Layers more calcic in cores. No systematic zoning in Cpx. Opx homogenous.                                                                                                  | T ~ 700 - 800 °C and 16 kbar (core and rim compositions used by Grt-Cpx-Pl-Qtz thermobarometry)                                                                  | Clockwise with steep ITD | <a href="#">SESEQUENTIAL</a>                                                 | -                                                                   | -                                                                                                                                                                                                                                                                                                                                                                                              |
| JF88 | Chert/calc-silicate nodules in marble | Christmas Mountains, Texas (aureole enclosing alkali gabbro) | Cal - Qtz                                                                            | $Cal   Wo   Qtz$ (102 - 125m from gabbro)<br>$Cal   Tilleite   Wo   Qtz$ (23 - 15m from gabbro)<br>$Cal   Spurrite   Wo   Qtz$ (13 - 0m from gabbro)     |                                                                                                                                                                                                                                                                                                                                 | No compositional variation in corona products possible.                                                                                                                                                                                                                         | No pressure estimate. Thermal gradient (from numerical models of cooling pluton) ranges from 600 °C (115m from contact) to 1030 °C (at contact)                  | -                        | <a href="#">SSDCSINGLE-STAGE</a>                                             | Closed: $L_{CaO}/L_{SiO_2} = 42$ and $L_{CaO}/L_{CO_2} > 1$         | Numerical modelling of diffusion controlled mineral growth in the aureole, yielded kinetic coefficients for non-isothermal processes.                                                                                                                                                                                                                                                          |

**Table 1 continued: Summary of prograde corona occurrences in the literature**

| Tag   | Bulk comp                  | Location                        | Reactants                                                     | Corona product assemblage                                                                                          | Corona Thickness, Vermicule size, Vermicule length, Vermicule spacing                                                                                                                                                                                                                                                                                                   | Equilibration                                                                                                                                                                                                                                                   | P, T of corona formation                                                                                                                                                                                                                                                                                       | Inferred P-T path     | Layer growth model | Diffusion model                                                         | Comments                                                                                                                                                                                       |
|-------|----------------------------|---------------------------------|---------------------------------------------------------------|--------------------------------------------------------------------------------------------------------------------|-------------------------------------------------------------------------------------------------------------------------------------------------------------------------------------------------------------------------------------------------------------------------------------------------------------------------------------------------------------------------|-----------------------------------------------------------------------------------------------------------------------------------------------------------------------------------------------------------------------------------------------------------------|----------------------------------------------------------------------------------------------------------------------------------------------------------------------------------------------------------------------------------------------------------------------------------------------------------------|-----------------------|--------------------|-------------------------------------------------------------------------|------------------------------------------------------------------------------------------------------------------------------------------------------------------------------------------------|
| ABE92 | Basic orthogneiss          | Jotun Nappe Complex, Norway     | OI - Pl                                                       | OI   Opx Tsk   Hbl   Hbl + Spl symp   Ep* Hbl + Spl symp   Ep* Ts + St + Spl symp   Ep* Ts + Ky symp   Pl          | Corona thickness: < 160 $\mu$ m<br>Vermicule size: Vermicule length: Not resolvable<br>Vermicule spacing:--<br>Vermicule Shape: Granoblastic-polygonal/interlobate epidote, spinel + hornblende needles/rods<br>Orientation: Needles weakly oriented perpendicular layer boundaries                                                                                     | Dis-equilibrium. Hbl AI/STI ratios decrease toward olivine. No systematic variation in Fe/Mg ratio of Spl and Hbl (AAI = 3.13 - 3.74 a.p.f.u.; AMg = 2.17 - 2.97 a.p.f.u).                                                                                      | Epidote-amphibolite facies. No quantitative thermobarometry                                                                                                                                                                                                                                                    | ITD                   | SSPCSINGLE-STAGE   | Open: $L_{C2} \approx L_{Mg} > L_{Fe} \geq L_{Ca} > L_{Al} \geq L_{Si}$ | St-Ky and Ky+Hbl stable in H <sub>2</sub> O-undersaturated conditions                                                                                                                          |
| K87   | Quartz Diorite             | Sesia Zone, Western Alps        | Bt - Matrix                                                   | Bt   Ms   Grt   Matrix (Jd + Qtz + Zo)                                                                             | Corona thickness: 100 $\mu$ m<br>Vermicule size: Vermicule length: < 50 $\mu$ m<br>Vermicule spacing:--<br>Vermicule Shape: Granoblastic-polygonal                                                                                                                                                                                                                      | Dis-equilibrium. $X_{Mg}$ and $X_{Fe}$ increase and $X_{Ca}$ decreases in garnet toward biotite ( $X_{Alm} = 0.6 - 0.73$ ; $X_{Mg} = 0.10 - 0.17$ ; $X_{Ca} = 0.30 - 0.10$ ).                                                                                   | Eclogite facies                                                                                                                                                                                                                                                                                                | Clockwise             | SSPCSINGLE-STAGE   | -                                                                       | Domainal equilibration (extent of which is determined by the amount of deformation) and wide variation in composition of peak phases precludes application of thermobarometry                  |
| WM83  | Metagabbro, metatroctolite | Adirondack Mountains, New York  | Ilm - Pl                                                      | Ilm   $\pm$ Bt   $\pm$ Hbl   $\pm$ Grt   Pl                                                                        | Corona thickness: < 100 $\mu$ m<br>Garnet vermicule size: Vermicule length: < 50 $\mu$ m<br>Vermicule spacing:--<br>Vermicule Shape: Columnar Opx and Bt oriented perpendicular layer boundaries                                                                                                                                                                        | No systematic zoning observed.                                                                                                                                                                                                                                  | 700 - 800°C and 8 $\pm$ 1 kbar from equilibrium assemblages in host rocks                                                                                                                                                                                                                                      | No P-T path suggested | SESEQUENT JAL      | -                                                                       | Open system invoked for mass balance. Polymetamorphic history, with a high pressure event following low pressure metamorphism.                                                                 |
| B01   | Granodiorite               | Dora-Maira Massif, Western Alps | Corona 1: Bt - Qtz<br>Corona 2: Bt - Kfs<br>Corona 3: Bt - Pl | Corona 1: Bt   Grt   Qtz<br>Corona 2: Bt   Grt   Grt + Qtz   Phg + Qtz   Kfs<br>Corona 3: Bt   Grt   Grt + Jd   Pl | Corona thickness:<br>Corona 1: 5 - 40 $\mu$ m<br>Corona 2: Layer 1: 10 - 120 $\mu$ m; Layer 2: 60 $\mu$ m; Layer 3: 100 $\mu$ m<br>Corona 3: Layer 1: -; Layer 2: < 100 $\mu$ m<br>Garnet vermicule size: Vermicule length: 2 - 50 $\mu$ m<br>Vermicule spacing:--<br>Vermicule Shape: Vermicular garnet to rod-like Phg<br>Orientation: Perpendicular layer boundaries | Dis-equilibrium. Corona 1: Garnet weakly zoned (no more detail provided). Corona 2: Garnet weakly zoned (no more detail provided). Corona 3: Garnet asymmetrically zoned with Ca increasing and Fe+Mg decreasing toward Pl.                                     | Eclogite facies. Minimum conditions of: 650 °C and 24 kbar, based on comparison between measured and modelled equilibrium compositions of garnet                                                                                                                                                               | Clockwise             | SSPCSINGLE-STAGE   | -                                                                       | Sectoral corona development around biotite depending on immediately adjacent phase. Each corona type represents different P-T conditions at which that corona-forming reaction is overstepped. |
| A98   | Metabasic granulite        | Yenisey Ridge, Siberia          | Pl - Pgt (now Opx + Cpx)                                      | Pl   Grt   Grt + Qtz   Cpx + Qtz + Grt   Pgt (Opx + Cpx exsolution)                                                | Corona thickness:<br>Layer 1: 440 $\mu$ m<br>Layer 2: 150 $\mu$ m<br>Layer 3: 300 $\mu$ m<br>Vermicule size: Vermicule length: 10 - 300 $\mu$ m<br>Vermicule spacing:--<br>Vermicule Shape: Granoblastic-polygonal/interlobate and locally needle/rod-like pyroxenes.<br>Orientation: None                                                                              | Dis-equilibrium. Layer 1 Grt is zoned: Fe increases and Ca decreases ( $X_{Alm} = 0.24 - 0.21$ ; $X_{Alm} = 0.54 - 0.60$ ). In layers 3 and 4, Grt $X_{Ca}$ is constant, while $X_{Fe}$ is higher than in layer 1. No systematic zonation in pyroxene observed. | Layer 4 Grt-Opx and Grt-Opx pairs yield 614 - 635 °C at 6 - 10 kbar (retrograde diffusional resetting). Al content in Opx, yields poorly constrained, slightly higher temperatures. Layer 4 Grt, Opx and Pl reactant yields a pressure estimate of 5.8 - 7.5 kbar (Grt-Opx-Pl-Qtz; Bhattacharya et al., 1991). | Clockwise             | SSPCSINGLE-STAGE   | Open: $L_{Si} \approx L_{Mg} \approx L_{Ca} > L_{Al} \approx L_{Fe}$    | The geobarometry is compromised by chemical potential gradients between phases in layer 4 and Pl reactant.                                                                                     |
| WM73  | Metagabbro                 | Adirondacks, New York           | OI - Pl                                                       | Southwestern Adirondacks: OI   Opx   Cpx + Spl symp   Pl                                                           | Corona thickness: < 0.25 mm<br>Vermicule size: Vermicule length: 0.01 - 0.25 mm<br>Vermicule spacing:--<br>Vermicule Shape: Vermicular symplectite and columnar Opx laths<br>Orientation: Strongly oriented perpendicular to layer boundaries                                                                                                                           | No variation in $X_{Mg}$ of pyroxenes.                                                                                                                                                                                                                          | Southwestern Adirondacks: marginally > 8 kbar and 800°C                                                                                                                                                                                                                                                        | Clockwise             | SSPCSINGLE-STAGE?  | -                                                                       | -                                                                                                                                                                                              |

Table 1 continued: Summary of prograde corona occurrences in the literature

| Tag  | Bulk comp                      | Location                                                    | Reactants                                                                                       | Corona product assemblage                                                                                                                                                           | Corona Thickness, Vermicule size, Vermicule length, Vermicule spacing                                                                                                                                                                                                                                                                                              | Equilibration                                                                                                                                                                                                                                                                                                                                                                                                           | P, T of corona formation                                                                                                                                                      | Inferred P-T path    | Layer growth model | Diffusion model                                                                                                                                                                                     | Comments                                                                                                                                                                                                                                                                                                                                                                                                                                  |
|------|--------------------------------|-------------------------------------------------------------|-------------------------------------------------------------------------------------------------|-------------------------------------------------------------------------------------------------------------------------------------------------------------------------------------|--------------------------------------------------------------------------------------------------------------------------------------------------------------------------------------------------------------------------------------------------------------------------------------------------------------------------------------------------------------------|-------------------------------------------------------------------------------------------------------------------------------------------------------------------------------------------------------------------------------------------------------------------------------------------------------------------------------------------------------------------------------------------------------------------------|-------------------------------------------------------------------------------------------------------------------------------------------------------------------------------|----------------------|--------------------|-----------------------------------------------------------------------------------------------------------------------------------------------------------------------------------------------------|-------------------------------------------------------------------------------------------------------------------------------------------------------------------------------------------------------------------------------------------------------------------------------------------------------------------------------------------------------------------------------------------------------------------------------------------|
| A01  | Hornblende xenoliths in marble | Ivrea zone, Northern Italy                                  | Hornblende - Marble                                                                             | Hbl + Grt + Cpx   Cpx   Grt + Cpx   Srp + Cpx   Cal                                                                                                                                 | Corona thickness:<br>Layer 1: 1 - 4 cm<br>Layer 2: 3 - 12 cm<br>Layer 3: < 2 cm<br>Vermicule size: ~ 1 mm<br>Vermicule spacing:--<br>Vermicule Shape: Granoblastic-interlobate except at layer boundaries where vermicular symplectite occurs<br>Preferred Orientation: Vermicular symplectite strongly oriented perpendicular to layer boundaries, otherwise none | Dis-equilibrium.<br>$X_{Mg}$ (0.8 - 0.55) and Tschermak's content in Cpx decreases toward Cal. No variation in Grt composition.                                                                                                                                                                                                                                                                                         | 700 - 900 °C and 7 - 10 kbar (independent estimates of peak conditions from pelites)                                                                                          | -                    | SSDCSINGLE-STAGE   | Open. A number of mass balance scenarios proposed based on qualitative evidence to constrain boundary fluxes.<br>$L_{SiO_2}/L_{CaO} > 2.5$ and $L_{SiO_2}/L_{CaO} < 10$ and $L_{SiO_2}/L_{CaO} > 1$ | Ahart et al. (2001) relaxed the constant volume or closure to certain components constraints to evaluate the overall reaction. Rather, they constrained a range of mass balance scenarios for which major element fluxes across boundaries were solved.                                                                                                                                                                                   |
| BB88 | Metapelite and Norite          | Hoggar-Iforas granulite unit, Mali                          | Corona 1: Grt - Sil<br>Corona 2: Grt - Qtz                                                      | Corona 1: Grt   Crd   Crd + Spl   Sil<br>St and younger euhedral Grt appear to replace Crd in a younger post-corona event.<br>Corona 2: Grt   Opx + Pl sym   Grt + Qtz   Qtz        | Corona thickness:<br>Corona 1: < 500 µm<br>Corona 2: < 700 µm<br>Vermicule size: 5 - 50 µm<br>Vermicule spacing:--<br>Vermicule Shape: Vermicular symplectite and granoblastic-polygonal/interlobate monomineralic layers<br>Preferred Orientation: Vermicular symplectite weakly oriented perpendicular to layer boundaries, otherwise none                       | Corona 1:<br>No zoning in Crd or Spl.<br>Garnet $X_{Mg}$ decreases rimward.<br>Corona 2:<br>No systematic zonation.<br>Opx: $X_{Fe} = 0.65 - 0.70$ , $X_{Mg} = 0.29 - 0.32$ and $X_{Ca} = 0.01 - 0.02$ .                                                                                                                                                                                                                | 550 - 650 °C and 4.5 - 5.7 kbar (thermobarometry using the assemblage Grt-Spl-Crd-Bt-Pl)                                                                                      | Clockwise isothermal | SEQUENTIAL         | -                                                                                                                                                                                                   | The first stage of corona growth involves breakdown of Grt to form Crd + Spl symplectites in the metapelites and Opx + Pl symplectites in the norites. Replacement of Crd + Spl by younger Grt and Sil, as well as the replacement of Opx and Pl symplectite by Grt + Qtz - suggests renewed burial. Thermobarometry yields P-T conditions of the latter event. P-T path reflects Eburnean decompression, followed by Pan African burial. |
| C06  | Metapelite                     | Huangtuling granulite, Northern Dabie Orogen, Eastern China | Corona 1: Bt - Pl<br>Corona 2: Opx - Pl<br>Corona 3: Grt - Qtz + liq<br>Corona 4: Bt - Pl + Qtz | Corona 1: Bt   Grt + Qtz   Pl<br>Corona 2: Opx   Grt + Qtz + Bt + Pl + Pl   Pl<br>Corona 3: Grt   Crd + Opx + Bt + Pl + Spl sym   Qtz + Melt<br>Corona 4: Bt   Crd + Opx + Qtz   Pl | Corona thickness:<br>100 - 200 µm<br>Vermicule size: 5 - 50 µm<br>Vermicule spacing:--<br>Vermicule Shape: Vermicular symplectite<br>Preferred Orientation: Vermicular symplectite weakly oriented perpendicular to layer boundaries                                                                                                                               | Coronas 1 and 2:<br>$X_{Ca}$ increases toward Pl (from 2 - 3 mol % to 3 - 4 mol %).<br>Opx: Al <sup>VI</sup> = 0.05 - 0.07 a.p.f.u. and $X_{Mg} = 0.59 - 0.63$<br>Garnet:<br>Ti = 0.24 - 0.28 a.p.f.u. and Al <sup>VI</sup> = 0.12 - 0.17 a.p.f.u.<br>Corona 3:<br>Opx: Al <sup>VI</sup> = 0.08 - 0.12 a.p.f.u. and $X_{Mg} = 0.63 - 0.65$<br>Biotite: $X_{Mg} = 0.71 - 0.76$<br>No indication of symmetry in zonation. | Coronas 1 and 2:<br>690 - 790 °C and 7.7 - 9.0 kbar<br>Coronas 3:<br>900 - 920 °C and 4.3 - 4.7 kbar<br>Corona 4:<br>860 - 880 °C and 4.0 - 4.4 kbar (Average PT, THERMOCALC) | Clockwise            | SSDCSINGLE-STAGE   | -                                                                                                                                                                                                   | Coronas formed at unique P-T conditions under steady-state conditions during multi-stage metamorphic history. Coronas 1 and 2: decompressive cooling on clockwise path (2000 Ma)<br>Coronas 3 and 4: renewed burial of granulites (220 Ma) on a second clockwise prograde path. Corona phase compositions broadly determined by composition of local reactants.                                                                           |
| I07  | Ultramafic                     | Sefuri Mountains, NW Kyushu, Japan                          | OI - Pl                                                                                         | Corona 1: OI   Opx   Pl<br>Corona 2: OI   Hbl + Opx   Hbl + Spl sym   Pl                                                                                                            | Corona thickness:<br>Corona 1: < 70 µm<br>Corona 2: < 400 µm<br>Vermicule size: --<br>Vermicule spacing:--<br>Vermicule Shape: Corona 1: Columnar Opx<br>Corona 2: Granoblastic-polygonal layer 1. Layer 2 comprises vermicular symplectite weakly oriented perpendicular to layer boundaries                                                                      | Al cation total decreases (1.21 - 0.48; 23 O's) and $X_{Mg}$ increases (0.88 - 0.91) in Hbl toward OI in layer 1. $X_{Al}$ in Opx increases toward Pl (0.06 - 0.11) in layer 1.                                                                                                                                                                                                                                         | 600 - 700 °C, 5 kbar (Hbl-Opx thermometry on mineral pairs from layer 2 - employing Gibbs method for Fe-Mg exchange between Hbl and Opx)                                      | Not described        | SSDCSINGLE-STAGE   | -                                                                                                                                                                                                   | Open system removal of MgO from the local corona volume, stabilises Opx in the corona                                                                                                                                                                                                                                                                                                                                                     |

**Table 1 continued: Summary of prograde corona occurrences in the literature**

| Tag   | Bulk comp                    | Location                                              | Reactants                                           | Corona product assemblage                                                                          | Corona Thickness, Vermicule-size, Vermicule length, Vermicule spacing                                                                                                                                                                                                                                                                                                               | Equilibration                                                                                                                                                                                                                                                                                                                                                       | P, T of corona formation                                                                                                                                                                       | Inferred P-T path | Layer growth model                    | Diffusion model                                                                                                                | Comments                                                                                                                                                                                                                                                                                                                                               |
|-------|------------------------------|-------------------------------------------------------|-----------------------------------------------------|----------------------------------------------------------------------------------------------------|-------------------------------------------------------------------------------------------------------------------------------------------------------------------------------------------------------------------------------------------------------------------------------------------------------------------------------------------------------------------------------------|---------------------------------------------------------------------------------------------------------------------------------------------------------------------------------------------------------------------------------------------------------------------------------------------------------------------------------------------------------------------|------------------------------------------------------------------------------------------------------------------------------------------------------------------------------------------------|-------------------|---------------------------------------|--------------------------------------------------------------------------------------------------------------------------------|--------------------------------------------------------------------------------------------------------------------------------------------------------------------------------------------------------------------------------------------------------------------------------------------------------------------------------------------------------|
| MCC03 | Metapelite                   | Makhavinekh Lake Pluton                               | Grt - Qtz + Fsp                                     | Grt   Crd + Opx   Pl   Opx   Qtz + Fsp                                                             | Corona thickness: < 50 µm (6 km from pluton) to > 1000 µm (adjacent to pluton)<br>Vermicule-size: Vermicule length: < 10 µm (6 km from pluton) to 250 µm (adjacent to pluton)<br>Vermicule spacing: --<br>Vermicule Shape: Elongate and vermicular furthest from contact becoming more equant toward pluton<br>Orientation: Rods strongly aligned perpendicular to garnet substrate | Al <sub>2</sub> O <sub>3</sub> wt% and X <sub>Mg</sub> of Opx increases toward reactant garnet. Magnitude of difference dependent on distance to pluton. Max ΔAl wt% = 0.8 wt%; Max ΔX <sub>Mg</sub> = 0.05. Overall Opx more Fe-rich and Al-rich toward pluton. Intracrystalline zonation toward lower Al wt% and X <sub>Mg</sub> values at margins of vermicules. | Grt-Opx<br>Al-solubility thermometry:<br>Contact: 785 - 875 °C at 5 kbar<br>At 6km: 650 - 750 °C                                                                                               | Contact aureole   | <del>S&amp;D&amp;C SINGLE STAGE</del> | -                                                                                                                              | Progressive replacement of garnet toward pluton contact                                                                                                                                                                                                                                                                                                |
| I002  | Pelitic and mafic granulites | Taylor Brook Gabbro Complex                           | Corona 1: Sil - Grt - Qtz<br>Corona 2: Grt - Qtz    | Corona 1: Grt   Spl + Crd   Qtz + Sil + Grt<br>Corona 2: Grt   Pl   Opx   Qtz                      | Corona thickness:<br>Corona 1: < 500 µm<br>Corona 2: < 100 µm<br>Vermicule-size: Vermicule length: < 300 µm<br>Corona 1: < 50 µm<br>Vermicule spacing: --<br>Vermicule Shape:<br>Corona 1: Tortuous, contorted lamellar symplectite<br>Corona 2: Granoblastic-polygonal<br>Orientation: Lamellae weakly aligned perpendicular to garnet substrate                                   | No zonation described.                                                                                                                                                                                                                                                                                                                                              | Grt-Opx-Pl-Qtz thermobarometry on corona phases in metabasite yields a P-T estimate of 4.4 kbar at 615°C.<br>Coronas in tonalitic gneiss yield a slightly higher P and T of 4.7 kbar at 645°C. | Contact aureole   | <del>S&amp;D&amp;C SINGLE STAGE</del> | -                                                                                                                              | -                                                                                                                                                                                                                                                                                                                                                      |
| BBOO  | Metapelite                   | Mafic Complex Contact Aureole                         | Crd - Kfs                                           | Crd   Bt + Sil + Qtz   Kfs                                                                         | Corona thickness: < 200 µm<br>Vermicule-size: Vermicule length: < 30 µm<br>Vermicule spacing: > 5 µm<br>Vermicule Shape: Vermicular symplectite                                                                                                                                                                                                                                     | No zonation described.                                                                                                                                                                                                                                                                                                                                              | -                                                                                                                                                                                              | Contact aureole   | -                                     | -                                                                                                                              | -                                                                                                                                                                                                                                                                                                                                                      |
| WMP04 | Metapelite                   | Ross of Mull Contact Metamorphic Aureole, Scotland    | Corona 1: Ky - Bt - Qtz<br>Corona 2: Grt - Qtz - Ms | Corona 1: Ky   Crd + Ms   Qtz + Bt<br>Corona 2: Grt   Crd + Bt   Qtz + Ms                          | Corona thickness:<br>Corona 1: < 350 µm<br>Corona 2: < 100 µm<br>Vermicule-size: Vermicule length: < 200 µm<br>Corona 1: -<br>Corona 2: < 20 µm<br>Vermicule spacing: --<br>Vermicule Shape:<br>Corona 1: Fibrous intergrowth<br>Corona 2: Elongate, anhedral biotite laths in cordierite<br>Orientation: Vermicules weakly aligned perpendicular to reactant substrate             | Zonation not described. Apparently in equilibrium.                                                                                                                                                                                                                                                                                                                  | P-T estimates based on relative stability of phases on P,T grids                                                                                                                               | Contact aureole   | -                                     | -                                                                                                                              | =                                                                                                                                                                                                                                                                                                                                                      |
| L04   | Metatroctolite               | Buck Creek Ultramafic body, North Carolina Blue Ridge | Oi - Pl                                             | Oi   Opx   Cpx + Spl symp   Pl<br>Oi   Opx   Cpx + Hbl symp   Pl<br>Oi   Opx   Cpx + Spr symp   Pl | Corona thickness: 0.5 - 0.75 mm<br>Vermicule-size: Vermicule length: --<br>Vermicule spacing: --<br>Vermicule Shape: Vermicular symplectite and elongate or columnar Opx laths<br>Orientation: Strongly oriented perpendicular to layer boundaries                                                                                                                                  | Equilibrium. No variation in composition.                                                                                                                                                                                                                                                                                                                           | 700 - 900 °C and > 9 kbar                                                                                                                                                                      | -                 | <del>S&amp;D&amp;C SINGLE STAGE</del> | Closed. No diffusion modelling performed. SVD analysis concludes Hbl of primary metamorphic origin - not retrograde after Cpx. | Overall corona reaction modelled by SVD (Singular Value Decomposition) matrix technique. Possible mass balance reactions are generated by SVD technique. A successful model is one that reproduces a sensible overall reaction with residuals that match expected analytical errors (Lang et al., 2004). Closed system approximation possibly invalid. |

Table 1 continued: Summary of prograde corona occurrences in the literature

| Tag | Bulk comp       | Location                                                                 | Reactants | Corona product assemblage                                                | Corona Thickness, Vermicule-size, Vermicule length, Vermicule spacing                                                                                                                                                                                                                                                                                                                                                                                         | Equilibration              | P, T of corona formation                                                                                                                                                                           | Inferred P-T path | Layer growth model | Diffusion model | Comments |
|-----|-----------------|--------------------------------------------------------------------------|-----------|--------------------------------------------------------------------------|---------------------------------------------------------------------------------------------------------------------------------------------------------------------------------------------------------------------------------------------------------------------------------------------------------------------------------------------------------------------------------------------------------------------------------------------------------------|----------------------------|----------------------------------------------------------------------------------------------------------------------------------------------------------------------------------------------------|-------------------|--------------------|-----------------|----------|
| DO2 | Mafic granofels | Arthur River Complex at Mt Daniel, Fiordland, New Zealand                | Hbl - Czo | Hbl   Cpx + Ky + Qtz + Pl   Czo                                          | Corona thickness: < 500 $\mu\text{m}$<br>Vermicule-size: Vermicule length: < 60 $\mu\text{m}$<br>Vermicule spacing:--<br>Vermicule Shape: Irregular, elongate, euhedral laths of Ky embedded in Cpx and Qtz.<br>Orientation: No preferred orientation                                                                                                                                                                                                         | No zonation - equilibrium. | The assemblage garnet, kyanite, plagioclase and quartz yielded pressure estimates of 13.2 kbar and temperature estimates of 700 °C using conventional thermobarometer of Newton and Perkins, 1982. | Contact aureole   | -                  | -               | -        |
| D97 | Metapelite      | Chimakurthy mafic-ultramafic complex aureoles, Eastern Ghats Belt, India | Spl - Crd | Corona 1: Spl   Grt + Sil + Crd   Crd<br>Corona 2: Grt   Opx + Sil + Spl | Corona thickness: Corona 1: < 75 $\mu\text{m}$ ; Corona 2: < 230 $\mu\text{m}$<br>Vermicule-size: Vermicule length: < 15 $\mu\text{m}$ ; Corona 2: < 10 $\mu\text{m}$<br>Vermicule spacing:--<br>Vermicule Shape: Corona 1: Irregular, lenticular sillimanite needles in cordierite intergrown with 'spongy' garnet.<br>Corona 2: Rod-like intergrowth of Opx, Sil and Spl<br>Orientation: Orthopyroxene vermicules aligned perpendicular to layer boundaries | No zonation described.     | P-T grid constraints on pressure: 5 - 6 kbar with cooling from 1000 °C.                                                                                                                            | Contact aureole   | -                  | -               | -        |

Formatted: Line spacing: single

JC90: Johnson and Carlson, (1990); N83: Nishiyama, (1983); J04: Johnson et al., (2004); WC97: White and Clarke, (1997); I93: Indares, (1993); JF88: Joesten and Fisher, (1988); ABE92: Ashworth et al., (1992); K87: Koons et al., (1987); WM83: Whitney and McLelland, (1983); A98: Ashworth et al., (1998); B01: Bruno et al., (2001); WM73: Whitney and McLelland, (1973); A01: Abart et al., (2001); BB88: Boullier and Barbey, (1988); C06: Chen et al., (2006); I07: Ikeda et al., (2007); MCC03: Mcfarlane et al., (2003); IO02: Ings and Owen, (2002); BB00: Barboza and Bergantz, (2000); WMP04: Wheeler et al., (2004); L04: Lang et al., 2004; D02: Daczko et al., (2002); D97: Dasgupta et al., (1997).



## Appendix 2.

**Table 2: Summary of retrograde corona occurrences in the literature**

| Tag   | Bulk comp           | Location                                   | Reactants                                                                                                                    | Corona product assemblage                                                                                                                                                    | Corona Thickness, Vermicule size, Vermicule length, Vermicule spacing                                                                                                                                                                                                                                                                                                                                                                                                                                                                  | Equilibration                                                                                                                                                                          | P, T of corona formation                                                                                                   | Inferred P-T path                                            | Layer growth model | Diffusion model                                                                                                                                          | Comments                                                                                                                                                                                                                                                              |
|-------|---------------------|--------------------------------------------|------------------------------------------------------------------------------------------------------------------------------|------------------------------------------------------------------------------------------------------------------------------------------------------------------------------|----------------------------------------------------------------------------------------------------------------------------------------------------------------------------------------------------------------------------------------------------------------------------------------------------------------------------------------------------------------------------------------------------------------------------------------------------------------------------------------------------------------------------------------|----------------------------------------------------------------------------------------------------------------------------------------------------------------------------------------|----------------------------------------------------------------------------------------------------------------------------|--------------------------------------------------------------|--------------------|----------------------------------------------------------------------------------------------------------------------------------------------------------|-----------------------------------------------------------------------------------------------------------------------------------------------------------------------------------------------------------------------------------------------------------------------|
| CJ91  | Metagabbro          | Llano Uplift, Central Texas                | Corona 1: Grt - Qtz<br>Corona 2: Grt - Omp                                                                                   | Corona 1: Grt   Pl+Mgt   Opx+Aug   Qtz<br>Corona 2: Grt   Pl+Prg sym   Mg-Hbl   Pl+Mg-Hbl+Opx sym   Omp                                                                      | Corona 1: Corona thickness: $PI = 60 \mu m$ ; $Opx+Hbl = 20 \mu m$<br>Vermicule size/Vermicule length: $< 5 - 10 \mu m$<br>Vermicule spacing: --<br>Vermicule Shape: Pl+Mgt - granoblastic-polygonal; Opx+Aug - columnar<br>Orientation: Columnar Opx+Aug perpendicular layer boundaries<br>Corona 2: Corona thickness: $200 \mu m$<br>Vermicule size/Vermicule length: $< 2 \mu m - 40 \mu m$<br>Vermicule Shape: Granoblastic-polygonal Pl; vermicular/rod-like Hbl and Opx<br>Orientation: Weakly perpendicular to layer boundaries | Dis-equilibrium.<br>Pl less calcic and amphibole Fe/Mg and Al/Si ratios decrease toward quartz/omphacite (An <sub>15</sub> - An <sub>10</sub> ).                                       | -                                                                                                                          | ITD                                                          | SSDC-SINGLE-STAGE  | Open<br>Grt-Qtz: $L_{Grt} > L_{Qtz} \geq L_{Omp}$<br>$\geq L_{Hbl} \geq L_{Pl}$<br>Grt-Omp: $L_{Omp} \approx L_{Grt} > L_{Hbl} \geq L_{Pl} \geq L_{Qtz}$ |                                                                                                                                                                                                                                                                       |
| CPG89 | Metapelite          | MacRobertson Land, Antarctica              | Corona 1: Crd - Spl<br>Corona 2: Spl - Matrix (Grt+Sil+Qtz+Kfs)<br>Corona 3: Ilm - Grt                                       | Corona 1: Spl   Mgt   Sil   Crd<br>Corona 2: Spl   Grt+Sil+Crd   Grt+Sil+Qtz+Kfs<br>Corona 3: Ilm   Sil   Grt                                                                | Corona thickness:<br>Corona 1: $200 \mu m$<br>Corona 2: $< 120 \mu m$<br>Grain size: - layer thickness<br>Grain shape: Granoblastic-polygonal<br>Orientation: None                                                                                                                                                                                                                                                                                                                                                                     | -                                                                                                                                                                                      | -                                                                                                                          | IBC following ITD                                            | SSDC-SINGLE-STAGE  | -                                                                                                                                                        | -                                                                                                                                                                                                                                                                     |
| K03   | Metapelite          | Mather Paragneiss, Rauer Group, Antarctica | Corona 1: Grt - Qtz<br>Corona 2: Grt - Bt<br>Corona 3: Sil - Opx                                                             | Corona 1: Grt   Crd+Opx sym   Opx   Qtz<br>Corona 2: Grt   Crd+Opx sym   Pl   Bt<br>Corona 3: Sil   Crd   Opx                                                                | Corona thickness: $< 0.5mm$<br>Grain size: --<br>Grain shape: --<br>Orientation: Symplectite phases perpendicular to layer boundaries                                                                                                                                                                                                                                                                                                                                                                                                  | Dis-equilibrium.<br>Crd $X_{Mg}$ varies across symplectite - generally not systematically, but $X_{Mg}$ may increase toward Opx.<br>No variation in Opx composition.                   | 750 - 800 °C and 7 - 8 kbar, (modal P-T-X relationships from pseudosections)                                               | Decompressive cooling on clockwise path                      | SSDC-SINGLE-STAGE  | -                                                                                                                                                        | -                                                                                                                                                                                                                                                                     |
| WPC02 | Fe-rich metapelites | Musgrave Block, Central Australia          | Grt - Matrix (Sil, Qtz, Kfs, Bt)                                                                                             | Grt   Spl+Qtz+Grt   Matrix<br>Grt encloses Spl in corona                                                                                                                     | Corona thickness: $< 0.5mm$<br>Grain size: $0.05 - 0.2 mm$<br>Grain shape: Granoblastic-polygonal/interlobate<br>Orientation: None                                                                                                                                                                                                                                                                                                                                                                                                     | Equilibrium.                                                                                                                                                                           | 800 - 850 °C and 5.5 - 6.0 kbar (P-T-X relationships from pseudosections)                                                  | Clockwise path with minor decompression dominated by cooling | SSDC-SEQUENTIAL    | -                                                                                                                                                        | Coronas develop in response to changing modes in a high variance equilibrium assemblage. No univariant reaction is crossed. Garnet is still stable. Implies that decompression implied by this texture may have been over-estimated in other terranes (Harley, 1989). |
| KS99  | Mg-rich metapelites | Highland Complex, Hakurutale, Sri Lanka    | Corona 1: Grt - Qtz<br>Corona 2: Grt - Qtz<br>Corona 3: Grt - Bt<br>Corona 4: Sil - Opx/Grt (SiO <sub>2</sub> Deficient EBC) | Corona 1: Grt   Opx+Sil sym   Opx   Qtz<br>Corona 2: Grt   Opx+Crd+Spr sym   Opx   Qtz<br>Corona 3: Grt   Opx+Pl+Crd sym   Bt<br>Corona 4: Sil   Crd+Spr sym   Crd   Opx/Grt | Corona Thickness:<br>Corona 1: $< 0.5mm$<br>Grain Size:<br>Corona 1: Coarse granoblastic-polygonal grains $< 0.2mm$ ; symplectite vermicules: $10 - 50 \mu m$<br>Grain shape: Symplectite: vermicular<br>Monomineralic layers: granoblastic-polygonal<br>Orientation: Symplectite vermicules weakly aligned perpendicular to layer boundaries                                                                                                                                                                                          | Dis-equilibrium.<br>Corona 1: Opx: $X_{Mg} = 0.76 - 0.84$ ; $X_{Al} = 0.09 - 0.15$<br>Corona 2: Opx: $X_{Mg} = 0.76 - 0.83$ ; $X_{Al} = 0.12 - 0.17$<br>No systematic variation noted. | 810 °C and 7.5 kbar.<br>TWO P-T estimate on Grt, Qtz, Opx, Crd assemblage. Assumed Grt + Qtz in equilibrium with products. | Clockwise path with ITD                                      | SSDC-SINGLE-STAGE  | -                                                                                                                                                        |                                                                                                                                                                                                                                                                       |

Table 2 continued.: Summary of retrograde corona occurrences in the literature

| Tag   | Bulk comp                | Location                                                           | Reactants                                                                   | Corona product assemblage                                                                                                                                                   | Corona Thickness, Vermicule size, Vermicule length, Vermicule spacing                                                                                                                                                                                                                                                                                                                                                     | Equilibration                                                                                                                                                                                     | P, T of corona formation                                                                                                                           | Inferred P-T path                                                                                     | Layer growth model                         | Diffusion model | Comments                                                                                                                                                            |
|-------|--------------------------|--------------------------------------------------------------------|-----------------------------------------------------------------------------|-----------------------------------------------------------------------------------------------------------------------------------------------------------------------------|---------------------------------------------------------------------------------------------------------------------------------------------------------------------------------------------------------------------------------------------------------------------------------------------------------------------------------------------------------------------------------------------------------------------------|---------------------------------------------------------------------------------------------------------------------------------------------------------------------------------------------------|----------------------------------------------------------------------------------------------------------------------------------------------------|-------------------------------------------------------------------------------------------------------|--------------------------------------------|-----------------|---------------------------------------------------------------------------------------------------------------------------------------------------------------------|
| N02   | Mafic, aluminous pelites | Thor-Odin Dome, Shuswap metamorphic core complex, British Columbia | Ged - Ky                                                                    | Ged   Crd   Crd+Spl sympl   Crd+Crn sympl   Ky                                                                                                                              | Corona thickness:<br>Layer 1: < 350 $\mu\text{m}$<br>Layer 2: < 900 $\mu\text{m}$<br>Layer 3: pseudomorphs kyanite<br>Vermicule size: Vermicule length: 25 - 350 $\mu\text{m}$<br>Vermicule spacing: 20 $\mu\text{m}$<br>Vermicule Shape: Vermicular symplectite; granoblastic-polygonal/interlobate in Crd moat<br>Orientation: Vermicular symplectite weakly oriented perpendicular to layer boundaries, otherwise none | Equilibrium. No variation in any phases noted.                                                                                                                                                    | P < 5 kbar and T ~ 750 °C. Equilibria constrained with TWQ and conventional thermobarometers.                                                      | Rapid isothermal decompression on a clockwise path                                                    | SSDCSINGLE-STAGE                           | -               |                                                                                                                                                                     |
| H06   | Metapelite               | Leverburgh Belt, South Harris, Scotland                            | Grt - Qtz                                                                   | Grt   Crd+Opx sympl   Opx   Qtz                                                                                                                                             | Corona thickness:<br>Layer 1: < 200 $\mu\text{m}$<br>Layer 3: < 50 $\mu\text{m}$<br>Vermicule size: Vermicule length: 10 - 50 $\mu\text{m}$<br>Vermicule spacing: 25 $\mu\text{m}$<br>Vermicule Shape: Rod-like symplectite; columnar Opx in layer 2.<br>Orientation: Vermicular symplectite weakly oriented perpendicular to layer boundaries                                                                            | Disequilibrium. No systematic variation described. Opx: y(Opx) = 0.02 - 0.08 X <sub>Mg</sub> = 0.71 - 0.78 Cordierite: X <sub>Mg</sub> = 0.89 - 0.92                                              | P ~ 9 kbar and T ~ 870 °C.                                                                                                                         | Isothermal decompression on anti-clockwise path                                                       | SSDCSINGLE-STAGE                           | -               |                                                                                                                                                                     |
| G80   | Metapelite               | Enderbyland, Antarctica                                            | Spr - Qtz                                                                   | Spr   Sil   Opx   Qtz                                                                                                                                                       | Corona Thickness: < 0.5mm                                                                                                                                                                                                                                                                                                                                                                                                 | -                                                                                                                                                                                                 | 7 ± 1 kbar; 900 ± 30 °C                                                                                                                            | Isobaric cooling on anticlockwise path                                                                | SSDCSINGLE-STAGE                           | -               |                                                                                                                                                                     |
| B04   | Troctolitic gabbro       | Snowbird Tectonic Zone, Western Canadian Shield                    | Grt - Cpx                                                                   | Grt   Opx+Pl sympl   Spl+Cpx+Opx sympl   Omp<br>Grt   Prg+Pl   Pl   Opx+Pl   Omp                                                                                            | Corona thickness:<br>Layer 1: < 70 $\mu\text{m}$<br>Layer 2: 20 $\mu\text{m}$<br>Layer 3: 50 $\mu\text{m}$<br>Vermicule size: Vermicule length: < 50 $\mu\text{m}$<br>Vermicule spacing:--<br>Vermicule Shape:<br>Elongate Prg laths: euhedral Opx rhombs<br>Orientation: Oriented perpendicular to layer boundaries                                                                                                      | Disequilibrium. Marked zonation in Pl (An <sub>10</sub> adjacent Grt to An <sub>4</sub> at corona margin). No variation in amphibole, orthopyroxene or clinopyroxene compositions documented.     | 850 - 855 °C at 10 - 12 kbar (two pyroxene thermometry) 810 °C and 12 kbar (Grt-Opx-Pl-Qtz equilibria - TWQ; Grt rim and symplectite compositions) | Isothermal decompression on clockwise path                                                            | SSDCSINGLE-STAGE?                          | -               | Corona mineralogy depends on availability of H <sub>2</sub> O to form amphibole. The use of corona plagioclase composition in TWQ thermobarometry may not be valid. |
| ACK07 | Metapelite               | NVP (Neocene Volcanic Province), El Hoyazo, Spain                  | Grt - Matrix (Bt+Sil+Pl)                                                    | Grt   Spl+Crd+Kfs+Melt (glass)   Matrix<br>Pl rinds separate Spl from Crd.                                                                                                  | Corona thickness:<br>< 150 $\mu\text{m}$<br>Vermicule size: Vermicule length: < 50 $\mu\text{m}$<br>Vermicule spacing:--<br>Vermicule Shape: Euhedral Spl and granoblastic-interlobate<br>Crd<br>Orientation: No preferred orientation                                                                                                                                                                                    | Equilibrium. No systematic variation in spinel or cordierite composition.                                                                                                                         | 820 ± 50 °C, 4.5 ± 0.6 kbar (ternary feldspar thermometry, Grt-Crd thermobarometry, GASP barometry)                                                | Rapid decompression during eruption followed by isobaric cooling                                      | SSDCSINGLE-STAGE/SEQS EQUEENTIAL           | -               | Plagioclase rind between cordierite and spinel is attributed to isobaric cooling post-eruption.                                                                     |
| T06   | Metapelite               | Mather Paragneiss, Rauer Group.                                    | 1) Grt<br>2) Grt - Melt<br>3) Sil - Opx<br>4) Grt - Qtz<br>5) Grt - Cpx+Hbl | 1) Grt   Spr+Opx+Crd sympl<br>2) Grt   Bt+Crd sympl   Melt<br>3) Sil   Spr+Crd sympl   Opx<br>4) Grt   Crd+Opx sympl   Opx   Qtz<br>5) Grt   Opx+Pl   Opx+Cpx+Mgt   Cpx+Hbl | Corona 5:<br>Corona thickness:<br>Layer 1: < 2 mm<br>Layer 2: 1 mm<br>Grain size: < 0.5 mm<br>Grain shape: Opx <sub>1</sub> is vermicular, Opx <sub>2</sub> is euhedral and columnar<br>Orientation:<br>Symplectite vermicules strongly aligned perpendicular to layer boundaries                                                                                                                                         | No variation in corona cordierite observed. Symplectitic Orthopyroxene: X <sub>Mg</sub> = 0.71 - 0.72; 4.1 - 4.2 Al <sub>2</sub> O <sub>3</sub> wt.%. Symplectitic Spr: Si = 1.36 - 1.39 a.p.f.u. | Two groups of post-peak P-T estimates: 980 - 1010 °C (Grt-Opx thermobarometry) and ~10 kbar; ~ 800 °C and ~ 7 kbar (Grt-Bt thermometry).           | Clockwise path with near isothermal decompression under ultrahigh T followed by decompression cooling | 1-4) SSDCSINGLE-STAGE<br>5) SEQSEQUEENTIAL | -               |                                                                                                                                                                     |

Formatted: Tab stops: Not at 0,63 cm

**Table 2 continued: Summary of retrograde corona occurrences in the literature**

| Tag  | Bulk comp                  | Location                                                  | Reactants | Corona product assemblage                                                                                                                                                     | Corona Thickness, Vermicule size, Vermicule length, Vermicule spacing                                                                                                                                                                                                                      | Equilibration                                                                                                                                                                                                                                                                                                                                                                                                                                                        | P, T of corona formation                                                   | Inferred P-T path                                                               | Layer growth model                                      | Diffusion model                                                                                                                                                                                                                                                                                                                                                                                                                                                                                                 | Comments                                                                                                                                                                                                                                                                                                                                                          |
|------|----------------------------|-----------------------------------------------------------|-----------|-------------------------------------------------------------------------------------------------------------------------------------------------------------------------------|--------------------------------------------------------------------------------------------------------------------------------------------------------------------------------------------------------------------------------------------------------------------------------------------|----------------------------------------------------------------------------------------------------------------------------------------------------------------------------------------------------------------------------------------------------------------------------------------------------------------------------------------------------------------------------------------------------------------------------------------------------------------------|----------------------------------------------------------------------------|---------------------------------------------------------------------------------|---------------------------------------------------------|-----------------------------------------------------------------------------------------------------------------------------------------------------------------------------------------------------------------------------------------------------------------------------------------------------------------------------------------------------------------------------------------------------------------------------------------------------------------------------------------------------------------|-------------------------------------------------------------------------------------------------------------------------------------------------------------------------------------------------------------------------------------------------------------------------------------------------------------------------------------------------------------------|
| G72  | Olivine pod in anorthosite | Sognefjord and Bergen, Norway                             | OI - Pl   | Type 1: Ol   Opx   Cpx   Grt   Cpx + Spl   Pl<br>Type 2: Ol   Opx   Cpx   Grt + Cpx + Spl   Pl<br>Type 3: Ol   Cpx   Grt + Cpx + Spl   Pl<br>Type 4: Ol   Cpx   Pl   Grt   Pl | Corona Thickness:<br>Type 2: Opx: 6 - 15 mm; Cpx: 4 - 6 mm; Grt: 7 - 15 mm;<br>Type 3: Opx: 1 cm; Cpx: 5 mm; Grt: 5 - 8 mm;<br>Type 4: Opx: 3 mm; Cpx: 1 mm; Grt: 2 mm;<br>Grain size: --<br>Grain shape: --<br>Orientation: --                                                            | Dis-equilibrium.<br>Type 2 corona: Bergen: Opx strongly zoned - Al content and X <sub>Fe</sub> increase from olivine toward Pl. Garnet strongly zoned - Ca decreases and Mg+Fe increases towards Cpx.<br>Sognefjord: All phases homogeneous.<br>Type 3 corona: All phases homogeneous, except garnet where Ca decreases toward Cpx.<br>Type 4 corona: Mg and Ca increase in Cpx toward plagioclase layer. Ca decreases in the garnet layer toward plagioclase layer. | 1000 °C and 12 kbar (Grt-Cpx thermometry)<br>Cooling to 500 °C             | Cooling from peak igneous T at high pressure                                    | SEQUENCENTIAL                                           | -                                                                                                                                                                                                                                                                                                                                                                                                                                                                                                               | Coronas 1 - 4 are considered to represent transient, increasingly more evolved stages of corona development on the P-T path.                                                                                                                                                                                                                                      |
| MA83 | Olivine metagabbro         | NE, Scotland                                              | OI - Pl   | Ol   Opx   Hbl   Hbl + Spl / An symp   Pl                                                                                                                                     | Corona thickness:<br>Opx: 70 µm; Hbl: 30 µm; Hbl + Spl: 100 µm<br>Spinel vermicule size: vermicule length: 0.5 - 5 µm (max. 30 µm)<br>Vermicule spacing: --<br>Vermicule Shape: Subhedral, columnar Hbl + Opx; vermicular spinel<br>Preferred Orientation: Perpendicular layer boundaries  | Dis-equilibrium.<br>Al content and X <sub>Fe</sub> of Opx and Hbl increase toward Pl reactant.<br>Opx: Al <sub>wt</sub> = 0.03 - 0.07; X <sub>Fe</sub> = 0.26 - 0.28<br>Hbl: Al <sub>wt</sub> = 2.72 - 2.77; X <sub>Fe</sub> = 0.28 - 0.26                                                                                                                                                                                                                           | Amphibolite facies. No quantitative thermobarometry                        | Cooling from peak igneous T                                                     | SINGLE-STAGE                                            | Open: L <sub>45</sub> ≥ L <sub>50</sub> ≥ L <sub>65</sub> > L <sub>60</sub> > L <sub>55</sub>                                                                                                                                                                                                                                                                                                                                                                                                                   |                                                                                                                                                                                                                                                                                                                                                                   |
| G88  | Metagabbro                 | Central Gneiss Belt, Western Grenville Province, Ontario. | OI - Pl   | Ol   Opx   Cpx   ±Amph   Grt   Pl                                                                                                                                             | Corona thickness:<br>Overall 250 - 500 µm<br>Vermicule/Grain size: Not resolvable<br>Vermicule spacing: Not resolvable<br>Vermicule Shape: Granoblastic-polygonal Grt, columnar Cpx and Opx<br>Preferred Orientation: Opx and Cpx oriented perpendicular to layer boundaries               | Dis-equilibrium.<br>Opx and Cpx zoned w.r.t. Al - increases from 1.4 - 1.8 wt% toward Pl.<br>Variable Si and Al in amphibole (± 2 wt%). Al/Si ratio decreases in the symplectite toward olivine. Garnet compositions are homogeneous.                                                                                                                                                                                                                                | 8 - 10 kbar and 700 - 750 °C from equilibrium assemblages in host gneisses | Cooling from peak igneous T at high pressure                                    | SINGLE-STAGE - with back reaction and re-equilibration. | Closed: Cross coefficient terms L <sub>C<sub>2</sub>O<sub>2</sub></sub> and L <sub>C<sub>2</sub>O<sub>2</sub></sub> introduced to stabilise garnet in symplectite. Semi-quantitative results only with L <sub>A<sub>2</sub>O<sub>2</sub></sub> ≈ L <sub>A<sub>2</sub>O<sub>2</sub></sub> > L <sub>A<sub>2</sub>O<sub>2</sub></sub> > L <sub>5</sub> and L <sub>50</sub> /L <sub>55</sub> < 6 - 8. L <sub>C<sub>2</sub>O<sub>2</sub></sub> /L <sub>5</sub> < 1.5 - 2.0. L <sub>50</sub> /L <sub>55</sub> < 4 - 6 | The closed system assumption forced Grant to assume a 'fictive' non-stoichiometric plagioclase composition to accommodate excess Ca required to stabilise Cpx-bearing coronas. The garnet layer was not included in the SINGLE-STAGE model since it was believed to post-date the main corona.                                                                    |
| J86  | Troctolitic gabbro         | Risor, Norway                                             | OI - Pl   | Ol   Opx   Opx + Spl symp   Hbl + Spl symp   Pl<br>Ol   Opx   Hbl   Hbl + Spl symp   Pl                                                                                       | Corona thickness:<br>Opx layer: 72 - 105 µm; Opx + Spl: 10 - 20 µm;<br>Hbl + Spl: 110 - 205 µm<br>Vermicule size: vermicule length: 1 - 2 µm<br>Vermicule spacing: --<br>Vermicule Shape: Opx and Hbl: columnar; Spl: needles/rods<br>Orientation: Spl rods perpendicular layer boundaries | Equilibrium - no variation described.                                                                                                                                                                                                                                                                                                                                                                                                                                | -                                                                          | Primary coronas magmatic in origin, followed by secondary solid-state annealing | SEQUENCENTIAL                                           | Closed: none stable                                                                                                                                                                                                                                                                                                                                                                                                                                                                                             | Diffusional instability of primary coronas drives secondary annealing to produce stable secondary solid-state coronas. Remodelled successfully by Ashworth (1986), consistent with emplacement into regional metamorphic terranes and cooling from igneous temperatures.                                                                                          |
| WM73 | Metagabbro                 | Adirondacks, New York                                     | OI - Pl   | Adirondack Highlands:<br>Ol   Opx   Cpx   Pl   Grt (± Cpx ± Hbl)   Pl                                                                                                         | Corona thickness:<br>Overall 500 - 700 µm<br>Vermicule/Grain size: not resolvable<br>Vermicule spacing: not resolvable<br>Vermicule Shape: Granoblastic-polygonal Grt; columnar Cpx and Opx<br>Preferred Orientation: Opx and Cpx oriented perpendicular to layer boundaries               | Al/Ts in Cpx decreases from Ol toward Pl (ascribed to formation under different P-T conditions in sequential model).<br>No variation in X <sub>Fe</sub> of pyroxenes.                                                                                                                                                                                                                                                                                                | Adirondack Highlands: ~8 kbar and 800 °C                                   | Cooling from peak igneous temperatures                                          | SEQUENCENTIAL                                           | -                                                                                                                                                                                                                                                                                                                                                                                                                                                                                                               | Close association of metagabbros with anorthosite argues against depression of relatively buoyant crust to depths sufficient to explain prograde formation of coronas. Garnet-bearing coronas in the Northern Adirondacks reflect higher pressures during corona formation. Absence of garnet locally in coronas is attributed to kinetic nucleation constraints. |

**Table 2 continued: Summary of retrograde corona occurrences in the literature**

| Tag   | Bulk comp  | Location                             | Reactants                                                                                                    | Corona product assemblage                                                                                                                                                                                                                                               | Corona Thickness, Vermicule size, Vermicule length, Vermicule spacing                                                                                                                                                                                                                                                                                                                                                                                                                           | Equilibration                                                                                                                                                                                                                                                                                                                                                                                                                 | P, T of corona formation                                                                                                                                                               | Inferred P-T path                             | Layer growth model | Diffusion model | Comments                                                                                                                                                            |
|-------|------------|--------------------------------------|--------------------------------------------------------------------------------------------------------------|-------------------------------------------------------------------------------------------------------------------------------------------------------------------------------------------------------------------------------------------------------------------------|-------------------------------------------------------------------------------------------------------------------------------------------------------------------------------------------------------------------------------------------------------------------------------------------------------------------------------------------------------------------------------------------------------------------------------------------------------------------------------------------------|-------------------------------------------------------------------------------------------------------------------------------------------------------------------------------------------------------------------------------------------------------------------------------------------------------------------------------------------------------------------------------------------------------------------------------|----------------------------------------------------------------------------------------------------------------------------------------------------------------------------------------|-----------------------------------------------|--------------------|-----------------|---------------------------------------------------------------------------------------------------------------------------------------------------------------------|
| D89   | Metapelite | Central Zone, Limpopo Belt, Zimbabwe | <p>Corona 1: Grt - Krn</p> <p>Corona 2: Crn - Krn</p> <p>Corona 3: Crn - Ged</p>                             | <p>Corona 1: Grt   Ged+Spr   Ged+Spr   Spr+Crd   Krn</p> <p>Corona 2: Crn   Spl   Spr+Crd   Krn</p> <p>Corona 3: Crn   Spl   Spr+Crd   Crd   Ged</p>                                                                                                                    | <p>Corona thickness:</p> <p>Corona 1: Layer 1: &lt; 200 μm; Layer 2: ~ 250 μm; Layer 3: &lt; 200 μm</p> <p>Corona 2: &lt; 750 μm</p> <p>Corona 3: Layer 1: &lt; 1000 μm; Layer 2: 500 μm; Layer 3: &lt; 700 μm</p> <p>Grain size: &lt; maximum layer thickness</p> <p>Grain shape:</p> <p>Symplectite: vermicular</p> <p>Monomineralic layers: granoblastic-polygonal</p> <p>Orientation: Symplectite vermicules radially aligned in sectors (not always perpendicular to layer boundaries)</p> | Equilibrium: No variation described in any phases.                                                                                                                                                                                                                                                                                                                                                                            | 700 - 800 °C; 3.5 - 5 kbar (MASH equilibria: Grt-Spr-Spl-Crd thermobarometry)                                                                                                          | Isothermal decompression                      | SESEQUENTIAL       | -               | -                                                                                                                                                                   |
| LAL87 | Metapelite | Paderu, Southern India               | <p>Corona 1: Spr - Qtz</p> <p>Corona 2: Spl - Qtz</p> <p>Corona 3: Spr - Sil</p> <p>Corona 4: Opx - Melt</p> | <p>Corona 1: Spr   Sil   Opx/Crd   Qtz</p> <p>Corona 2: Spl   Spr   Sil   Qtz</p> <p>Spl   Spr   Opx   Qtz</p> <p>Corona 3: Spl   Sil   Opx   Qtz</p> <p>Spl   Spr   Sil   Grt/Opx   Qtz</p> <p>Corona 4: Spr   Opx   Sil</p> <p>Corona 4: Opx   Bt+Qtz symp   Melt</p> | -                                                                                                                                                                                                                                                                                                                                                                                                                                                                                               | No systematic variation recorded for any corona phases.                                                                                                                                                                                                                                                                                                                                                                       | 900 ± 60 °C and 6.5 ± 0.7 kbar to 760 ± 50°C and 5.0 ± 0.6 kbar (Grt-Opx thermobarometry) and relationships on the FMASH petrogenetic grid                                             | Decompressive cooling on clockwise path.      | SSDCSINGL E-STAGE  | -               | Variation in corona mineralogy dependent on topology of petrogenetic grid and local variation in bulk composition ( $\mu_{FeO}$ , $\mu_{SiO_2}$ and $\mu_{H_2O}$ ). |
| O04   | Metapelite | Kontum Massif, Central Vietnam       | Grt - Qtz                                                                                                    | <p>Grt   ±Prp±Spl symp   Crd+Opx symp   Opx   ±Pl±Kfs   Qtz</p>                                                                                                                                                                                                         | <p>Corona thickness: Symp layer: &lt; 400 μm; Mono Opx: &lt; 100 μm; Vermicule size: Vermicule length: 20 - 100 μm</p> <p>Vermicule spacing: 10 - 30 μm</p> <p>Vermicule Shape: Symplectite: vermicular</p> <p>Monomineralic Opx: Columnar/blocky; Spl: needles/rods</p> <p>Orientation: Weakly oriented perpendicular to layer boundaries</p>                                                                                                                                                  | <p>Disequilibrium. Zonation noted but not described.</p> <p>Symplectite Opx: <math>X_{Mg} = 0.62 - 0.70</math>; 5.8 - 7.6 Al<sub>2</sub>O<sub>3</sub> wt%</p> <p>Crd: <math>X_{Mg} = 0.82 - 0.84</math></p> <p>Spl: <math>X_{Mg} = 0.67 - 0.71</math></p> <p>Mono Opx: <math>X_{Mg} = 0.67 - 0.71</math>; 4.7 - 5.3 Al<sub>2</sub>O<sub>3</sub> wt%</p>                                                                       | Cooling from 9 kbar, 1000 °C to 6.5 kbar, 800 °C from FMASH petrogenetic grid, $X_{Al}$ and $X_{Mg}$ contours.                                                                         | ITD on clockwise path                         | SESEQUENTIAL       | -               | Assumed preserved metastable equilibria in corona represent discrete P-T conditions.                                                                                |
| T04   | Metapelite | Ganguvarpatti, Southern India        | <p>Corona 1: Grt - Matrix</p> <p>Corona 2: Grt - Qtz</p>                                                     | <p>Corona 1: Grt   Opx±Spr±Spl   Matrix (composite symplectite)</p> <p>Corona 2: Grt   Opx+Crd   Qtz</p>                                                                                                                                                                | <p>Corona Thickness: Corona 1: &lt; 300 μm</p> <p>Corona 2: Layer 1: &lt; 1000 μm</p> <p>Grain size: 50 - 100 μm</p> <p>Grain shape: Symplectite: needle-like Spr rods</p> <p>Monomineralic layers: granoblastic-polygonal</p> <p>Orientation: Symplectite Spr vermicules strongly aligned radially w.r.t layer boundaries Opx vermicules perpendicular to layer boundaries</p>                                                                                                                 | <p>Near equilibrium. Minor asymmetrical zonation in cordierite described with highest <math>X_{Mg}</math> values adjacent to garnet (<math>X_{Mg}</math>: 0.85 - 0.89).</p> <p>Spr <math>X_{Mg}</math>: 0.73 - 0.75</p> <p>Spl <math>X_{Mg}</math>: 0.41 - 0.44</p> <p>Opx in corona 1: Al<sub>2</sub>O<sub>3</sub> contents 7.6 - 8.2 wt %.</p> <p>Opx in corona 2: Al<sub>2</sub>O<sub>3</sub> contents 6.9 - 7.5 wt %.</p> | <p>Crd+Opx symp: 950 - 990 °C, &gt; 8kbar</p> <p>Crd±Spr±Spl symp: 850 - 900 °C, 8 kbar (<math>X_{Mg}</math> and <math>X_{Al}</math> Opx thermobarometry, Hensen and Harley, 1990)</p> | Steep decompressive cooling on clockwise path | SSDCSINGL E-STAGE  | -               | -                                                                                                                                                                   |

**Table 2 continued: Summary of retrograde corona occurrences in the literature**

| Tag   | Bulk comp         | Location                        | Reactants                                       | Corona product assemblage                                                                                                                                                                                      | Corona Thickness, Vermicule-size, Vermicule length, Vermicule spacing                                                                                                                                                                                                                                                                     | Equilibration                                                                                                                                                                                                                                                               | P, T of corona formation                                                                                                                                                                                                                               | Inferred P-T path                                                                      | Layer growth model | Diffusion model                                                                                             | Comments                                                                                                                                                                                                                                                                                                          |
|-------|-------------------|---------------------------------|-------------------------------------------------|----------------------------------------------------------------------------------------------------------------------------------------------------------------------------------------------------------------|-------------------------------------------------------------------------------------------------------------------------------------------------------------------------------------------------------------------------------------------------------------------------------------------------------------------------------------------|-----------------------------------------------------------------------------------------------------------------------------------------------------------------------------------------------------------------------------------------------------------------------------|--------------------------------------------------------------------------------------------------------------------------------------------------------------------------------------------------------------------------------------------------------|----------------------------------------------------------------------------------------|--------------------|-------------------------------------------------------------------------------------------------------------|-------------------------------------------------------------------------------------------------------------------------------------------------------------------------------------------------------------------------------------------------------------------------------------------------------------------|
| ZH07  | Metapelite        | Vestfold Hills, East Antarctica | Corona 1: Pl - Opx<br>Corona 2: Grt - Pl        | Corona 1: Pl   Pl <sub>1</sub>   ±Kfs   Grt <sub>1</sub> +Qtz   Opx<br>Corona 2: Grt   Grt <sub>2</sub> +Qtz   Pl <sub>2</sub>                                                                                 | Corona Thickness:<br>Corona 1:<br>Layer 1: ?<br>Layer 2: < 30 µm<br>Layer 3: < 170 µm<br>Corona 2:<br>Layer 1: < 100 µm<br>Grain size: 5 - 100 µm<br>Grain shape:<br>Symplectite: granoblastic<br>Monomineralic layers: granoblastic-polygonal<br>Orientation:<br>Symplectite vermicules weakly aligned perpendicular to layer boundaries | Grt <sub>2</sub> zoned radially w.r.t. Ca, Fe and Mg. Alm <sub>45-60</sub> Gr <sub>30-35</sub> Pip <sub>10-15</sub> Sps <sub>1-3</sub> , with X <sub>Ca</sub> of 0.21 - 0.24.                                                                                               | 600 - 680 °C, 6 - 8 kbar (Garnet-Opx thermometry, GAFS barometry)                                                                                                                                                                                      | Isobaric cooling                                                                       | SSDCSINGL E-STAGE  | -                                                                                                           | -                                                                                                                                                                                                                                                                                                                 |
| M98   | Fayalite granites | Lofoten Islands, Norway         | Corona 1: Fa/Mgt - Pl<br>Corona 2: Fa/Mgt - Kfs | Corona 1: Fa   Opx   Grt+Opx   Pl/Kfs<br>Corona 2: Fa   Opx   Amph   Pl/Kfs (Opx+Grt layers thinner and Opx:Grt in Opx+Grt layer is higher adjacent to Kfs than Pl)<br>Mgt   Grt+Opx   Fsp<br>Mgt   Amph   Fsp | Corona Thickness:<br>Corona 1:<br>Layer 1: < 50 µm<br>Layer 2: < 20 µm<br>Grain size: 2 - 20 µm<br>Grain shape:<br>Symplectite: granoblastic<br>Monomineralic layers: polygonal granoblastic<br>Orientation:<br>Symplectite vermicules aligned perpendicular to layer boundaries                                                          | Disequilibrium. Garnet only exhibits zonation, becoming more calcic (X <sub>Ca</sub> : 0.09 - 0.15) and magnesian (X <sub>Mg</sub> : 0.95 - 0.97) toward feldspar.                                                                                                          | 780 - 840 °C and 4 - 10 kbar (Grt-Cpx-Opx-Pl thermobarometry). Large variation in pressure is due to variation in garnet composition across the corona.                                                                                                | Cooling from peak igneous temperatures                                                 | SSDCSINGL E-STAGE  | Open system model with constant volume constraint:<br>$L_{Ca} > L_{Mg} > L_{Al} > L_{Si} > L_{Fe} > L_{Ti}$ | Markl et al. (1998) is first study to constrain relative diffusion coefficients of major components in granulite facies granitic rocks.                                                                                                                                                                           |
| BPS87 | Metapelite        | Errabiddy, Western Australia    | Corona 1: Grt - Ged<br>Corona 2: Ky - Ged       | Corona 1: Grt   Crd+Ged   Ged<br>Corona 2: Ky   St   Crd   Ged                                                                                                                                                 | Corona thickness: < 100 µm<br>Grain size: 20 µm<br>Grain shape:<br>Symplectite: granoblastic<br>Monomineralic layers: granoblastic-polygonal<br>Orientation: Symplectite vermicules aligned perpendicular to layer boundaries                                                                                                             | Corona 1: X <sub>Ca</sub> in Crd decreases from 0.17 near Grt to 0.1 - 0.13 adjacent to Ged. Ged X <sub>Ca</sub> : 0.37 - 0.47; Al <sup>IV</sup> : 1.3 - 2.2.<br>Corona 2: X <sub>Ca</sub> in Crd increases toward Ged from 0.10 to 0.16. Ged X <sub>Ca</sub> : 0.26 - 0.36 | 600 - 650 °C, 4 - 6 kbar (P-T-X phase equilibria)                                                                                                                                                                                                      | Clockwise reheating of originally high-grade rocks, followed by isothermal uplift      | SSDCSINGL E-STAGE  | -                                                                                                           | Variations in the proportions of cordierite and staurolite are directly related to the X <sub>Ca</sub> and Ca composition of gedrite reactant.                                                                                                                                                                    |
| BK003 | Metapelite        | Egupa Complex, NW Namibia       | Grt - Qtz                                       | Grt   Crd+Opx   Pl   Opx   Qtz                                                                                                                                                                                 | Corona thickness:<br>Layer 1: < 250 µm<br>Layer 2: < 70 µm<br>Grain size: 20 - 250 µm<br>Grain shape: Symplectite - lamellar<br>Orientation: Symplectite vermicules aligned perpendicular to layer boundaries                                                                                                                             | Opx X <sub>Al</sub> increases toward Grt (Al <sub>100</sub> : 0.12 - 0.25). X <sub>Ca</sub> of Opx and Crd decrease toward Qtz (0.66 - 0.52 in Opx; X <sub>Ca</sub> : 0.87 - 0.81 in Crd) No zonation in Pl.                                                                | Stage 1 corona formation: 940 ± 30 °C and 8 ± 2 kbar (Grt-Opx thermometry and Grt-Opx-Pl-Qtz barometry on Grt rim, layer 2 Pl and layer 3 Opx)<br>Stage 2 corona growth: 800 ± 60 °C and 6 ± 2 kbar (Grt-Opx thermometry and Grt-Opx-Pl-Qtz barometry) | Post peak decompression, followed by near isobaric cooling - clockwise retrograde path | SSDCSINGL E-STAGE  | -                                                                                                           | Increase in Al content in Opx toward Qtz inconsistent with diffusion controlled growth, i.e., Al diffusion is rate-limiting. Either Al diffused anomalously quickly in this instance or the Crd+Opx symplectites formed at lower temperature. Thermobarometry potentially applied to disequilibrium compositions. |
| TM85  | Emetites          | Cortland Complex, New York      | Spr - Qtz                                       | Spr   Opx   Sil   Qtz                                                                                                                                                                                          | Corona thickness: < 60 µm<br>Grain size: < 60 µm<br>Grain shape: Granoblastic-polygonal<br>No preferred orientation                                                                                                                                                                                                                       | Disequilibrium. Homogeneous Fe+Mg in Opx. Al content in Opx increases toward Spr.                                                                                                                                                                                           | -                                                                                                                                                                                                                                                      | -                                                                                      | SSDCSINGL E-STAGE  | -                                                                                                           | Partial equilibrium attained by Fe+Mg, i.e., inferred to be the most rapidly diffusing components such that chemical potential gradients were eliminated                                                                                                                                                          |

Formatted: None, Space Before: 0 pt, After: 0 pt, Don't keep with next

**Table 2 continued: Summary of retrograde corona occurrences in the literature**

| Tag   | Bulk comp  | Location                             | Reactants                                            | Corona product assemblage                                                                | Corona Thickness, Vermicule size, Vermicule length, Vermicule spacing                                                                                                                                                                                                                                                                                                                                                                                        | Equilibration                                                                                                                                                                                        | P, T of corona formation                                                   | Inferred P-T path                              | Layer growth model   | Diffusion model | Comments |
|-------|------------|--------------------------------------|------------------------------------------------------|------------------------------------------------------------------------------------------|--------------------------------------------------------------------------------------------------------------------------------------------------------------------------------------------------------------------------------------------------------------------------------------------------------------------------------------------------------------------------------------------------------------------------------------------------------------|------------------------------------------------------------------------------------------------------------------------------------------------------------------------------------------------------|----------------------------------------------------------------------------|------------------------------------------------|----------------------|-----------------|----------|
| TVR06 | Metapelite | Central Zone, Limpopo Belt, Zimbabwe | Sil - Ged                                            | Sil   Spr±Spl±Crd   Crd   Ged                                                            | Corona Thickness:<br>Corona 1:<br>Layer 1: < 100 µm<br>Layer 2: < 200 µm<br>Grain size: < 100 µm<br>Grain shape:<br>Symplectite: needle-like Spr rods<br>Monomineralic layers: granoblastic-polygonal/interlobate<br>Orientation:<br>Symplectite Spr vermicules strongly aligned radially w.r.t. layer boundaries                                                                                                                                            | Equilibrium. Negligible compositional variation described.                                                                                                                                           | 500 - 570 °C, 4 - 6 kbar (X <sub>Al</sub> in Opx; Grt-Crd thermobarometry) | Clockwise decompressive cooling                | SSPCSINGL<br>E-STAGE | -               | -        |
| HM96  | Metapelite | Central Zone, Limpopo Belt, Botswana | Corona 1:<br>Sil - Opx<br><br>Corona 2:<br>Grt - Qtz | Corona 1:<br>Sil   Spr±Crd symp   Crd   Opx<br><br>Corona 2:<br>Grt   Opx±Crd symp   Qtz | Corona thickness:<br>Corona 1: Layer 1: < 80 µm; Layer 2: < 400 µm<br>Corona 2: < 500 µm<br>Vermicule size/Vermicule length:<br>Corona 1: not resolvable<br>Corona 2: 50 - 200 µm<br>Vermicule spacing:<br>Corona2: ~ 20 µm.<br>Vermicule Shape:<br>Symplectite phases: vermicular<br>Monomineralic layers: granoblastic-polygonal<br>Orientation:<br>Spr rods radially oriented w.r.t. layer boundaries<br>Opx vermicules perpendicular to layer boundaries | No systematic variation recorded for any phases.<br>Corona 2:<br>Symplectite Opx: X <sub>Al</sub> = 0.68 - 0.75;<br>4 - 9.0 Al <sub>2</sub> O <sub>3</sub> wt%<br>Crd: X <sub>Al</sub> = 0.85 - 0.89 | ~ 800 °C and ~ 6 kbar (Grt-Opx thermometry, FMASH P,T grid)                | Isothermal uplift followed by isobaric cooling | SSPCSINGL<br>E-STAGE | -               | -        |

CJ91: Carlson and Johnson, (1991); CPG89: Clarke et al., (1989); K03: Kelsey et al., (2003b); WPC02: White et al., (2002); KS99: Kriegsman et al., (1999); N02: Norlander et al., (2002); H06: Hollis et al., (2006); G80: Grew, (1980); B04: Baldwin et al., (2004); ACK07: Alvarez-Valero et al., (2007); T06: Tong and Wilson, (2006); G72: Griffin, (1972); MA83: Mongkoltip and Ashworth, (1983); G(88): Grant, (1988); J86: Joesten, (1986); WM73: Whitney and McLelland, (1973); D89: Droop, (1989); LAL87: Lal et al., (1987); O04: Osanai et al., (2004); T04: Tamashiro et al., (2004); ZH07: Zulbati and Harley, (2007); M98: Markl et al., (1998); BPS97: Baker et al., (1987); BKO03: Brandt et al., (2003); TM85: Tracey and McLellan, (1985); TVR06: Tsunogae and Van Reenen, (2006); HM96: Hisada and Miyano, (1996).

Formatted: Line spacing: 1,5 lines
